# Supplementary material for: HIF-1α regulates IL-1β and IL-17 in sarcoidosis
Source: eLife. 2019 May 1;8:e44519. doi: 10.7554/eLife.44519 (PMC6506207; doi:10.7554/eLife.44519)
Supplement: Figure 1—source data 1. [file elife-44519-fig1-data1.xlsx]

## Sheet: DE genes
Gene	Status	Mean Count	log2(Fold Change)	Std. err. log2(Fold Change)	q value
EIF3M	OK	79.8	-0.984	0.125	3.59e-11
NCL	OK	608	-1.02	0.132	4.22e-11
GABARAPL1	OK	63.9	1.18	0.159	2.36e-10
NPM1	OK	362	-1.17	0.157	2.36e-10
CDK4	OK	36.4	-1.47	0.199	2.74e-10
APEX1	OK	91.5	-1.16	0.159	3.24e-10
UTP20	OK	50.7	-1.33	0.183	4.74e-10
HSPD1	OK	226	-1.62	0.227	9.98e-10
PTMA	OK	702	-0.721	0.101	9.98e-10
EBNA1BP2	OK	37.5	-1.52	0.214	1.04e-09
RAN	OK	168	-1.11	0.158	1.04e-09
RPS6	OK	889	-0.849	0.12	1.04e-09
C1QBP	OK	58.9	-1.41	0.201	1.19e-09
NOLC1	OK	120	-1.29	0.185	1.36e-09
SLC25A5	OK	120	-0.928	0.132	1.36e-09
NCBP2	OK	71.5	-0.849	0.125	5.47e-09
GPR107	OK	111	0.625	0.0923	6.32e-09
PRPF19	OK	54	-1.12	0.167	6.68e-09
CCT2	OK	103	-1.17	0.174	6.68e-09
MRTO4	OK	32.3	-1.52	0.226	6.92e-09
COL6A3	OK	25.3	-2.04	0.303	6.92e-09
NEAT1	OK	2560	0.788	0.118	9.52e-09
TOMM40	OK	32	-1.38	0.208	9.52e-09
GNB2L1	OK	446	-0.678	0.102	1.07e-08
SLA2	OK	62.7	1.16	0.176	1.23e-08
FKBP4	OK	72.3	-1.27	0.193	1.49e-08
PA2G4	OK	134	-1.05	0.16	1.49e-08
SSRP1	OK	100	-1.08	0.165	1.73e-08
CCT3	OK	145	-1.16	0.177	1.78e-08
PRMT1	OK	128	-1.33	0.204	1.78e-08
RCC1	OK	38.9	-1.2	0.185	2.25e-08
RPS5	OK	271	-0.899	0.139	2.3e-08
RPL5	OK	518	-0.888	0.137	2.38e-08
TCP1	OK	148	-1.02	0.158	2.93e-08
ATP5G3	OK	63.3	-0.913	0.142	3.19e-08
HSPA8	OK	633	-0.992	0.156	4.04e-08
PLXND1	OK	166	1.48	0.232	4.16e-08
SSB	OK	94.2	-0.815	0.128	4.54e-08
GNL3	OK	74.1	-1.04	0.164	5.01e-08
HSP90AB1	OK	1110	-1.34	0.212	5.23e-08
MYC	OK	58.8	-1.26	0.2	5.7e-08
PHB2	OK	82.5	-0.874	0.139	6.36e-08
HSPE1	OK	57.3	-1.75	0.279	6.83e-08
CCT6A	OK	160	-0.954	0.153	7.38e-08
RPL22L1	OK	28.8	-1.3	0.208	7.72e-08
VARS	OK	47.4	-1.33	0.213	8.49e-08
SFXN1	OK	66.7	-0.846	0.136	9.13e-08
NME1	OK	23	-1.72	0.278	1.04e-07
ATP5A1	OK	172	-0.712	0.115	1.04e-07
LRPPRC	OK	105	-0.955	0.155	1.04e-07
ATIC	OK	38.7	-1.38	0.223	1.04e-07
NOP16	OK	20.3	-1.59	0.257	1.04e-07
ANP32B	OK	188	-0.624	0.101	1.04e-07
TRAP1	OK	40.6	-1.36	0.221	1.3e-07
RPL24	OK	261	-0.737	0.121	1.61e-07
ERN1	OK	91.7	1.22	0.201	1.62e-07
TNFAIP3	OK	616	0.752	0.124	1.63e-07
ANP32A	OK	126	-0.73	0.12	1.81e-07
ILF2	OK	121	-0.837	0.138	1.83e-07
SGSH	OK	32.2	0.998	0.165	1.85e-07
RPL18	OK	365	-0.676	0.112	1.97e-07
SNRPD1	OK	41.9	-1.24	0.207	2.21e-07
RUVBL1	OK	23.4	-1.55	0.257	2.41e-07
RPS7	OK	148	-0.686	0.115	2.8e-07
RPIA	OK	30.8	-1.16	0.194	2.8e-07
HSPA4	OK	122	-0.786	0.132	2.8e-07
CMSS1	OK	13.7	-1.59	0.266	2.84e-07
LDHB	OK	243	-1.3	0.219	2.88e-07
IPO5	OK	108	-0.891	0.149	2.88e-07
XRCC6	OK	212	-0.663	0.112	3.15e-07
RPL7A	OK	406	-0.721	0.121	3.27e-07
CCDC86	OK	17.2	-1.65	0.279	3.87e-07
RANBP1	OK	44.9	-1.34	0.229	4.97e-07
PHB	OK	82.9	-1.33	0.228	5.48e-07
FBL	OK	173	-1.01	0.172	5.59e-07
HNRNPAB	OK	113	-0.986	0.169	5.93e-07
SSBP1	OK	52.8	-1.01	0.173	6.15e-07
FOXO3	OK	54.7	1.13	0.194	6.22e-07
RPLP0	OK	435	-0.788	0.136	6.38e-07
ADSL	OK	39.7	-0.959	0.165	6.38e-07
EIF3I	OK	84	-0.847	0.146	7.07e-07
RPSA	OK	266	-1.01	0.174	7.18e-07
NAA10	OK	23	-1.12	0.194	7.35e-07
GPATCH4	OK	45.5	-1.39	0.241	7.55e-07
EIF4A3	OK	47.2	-0.817	0.142	7.55e-07
NACA	OK	300	-0.619	0.107	7.74e-07
DCTPP1	OK	31.5	-1.44	0.25	8.26e-07
PTK2B	OK	180	0.768	0.134	8.42e-07
SERBP1	OK	255	-0.744	0.13	8.57e-07
RPL19	OK	420	-0.638	0.111	8.57e-07
RPS24	OK	322	-0.747	0.131	9.71e-07
MRPL12	OK	23.3	-1.26	0.222	9.89e-07
METAP2	OK	78	-0.789	0.138	1.01e-06
RPL14	OK	320	-0.716	0.126	1.01e-06
CCT5	OK	161	-0.858	0.151	1.09e-06
ZSWIM8	OK	122	0.736	0.13	1.19e-06
RPL35	OK	225	-0.732	0.129	1.19e-06
NPM3	OK	15.4	-1.7	0.3	1.23e-06
ILF3	OK	359	-0.541	0.0958	1.28e-06
CEBPD	OK	15.1	1.65	0.291	1.28e-06
PSAP	OK	1120	1.06	0.187	1.39e-06
TRMT1	OK	53.2	-1.07	0.189	1.39e-06
AHCY	OK	30.9	-1.12	0.199	1.39e-06
SLC1A3	OK	57.3	1.55	0.275	1.39e-06
FARSB	OK	27.2	-1.35	0.239	1.41e-06
RPL4	OK	638	-0.748	0.133	1.43e-06
RPL7	OK	381	-0.826	0.147	1.43e-06
NPC1	OK	87.4	0.918	0.164	1.5e-06
RPS3	OK	823	-0.607	0.109	1.62e-06
RPL6	OK	232	-0.736	0.132	1.62e-06
SUPT16H	OK	140	-0.683	0.122	1.62e-06
TMA16	OK	17.8	-1.29	0.231	1.62e-06
EPG5	OK	98.9	0.661	0.118	1.72e-06
NOP56	OK	108	-1.04	0.187	1.72e-06
AKAP13	OK	549	0.546	0.0981	1.82e-06
GOT2	OK	32.2	-1.12	0.202	2.04e-06
RPL18A	OK	164	-0.702	0.127	2.04e-06
DKC1	OK	67.4	-0.979	0.177	2.04e-06
MYO9B	OK	362	0.628	0.113	2.07e-06
MADD	OK	99.8	0.661	0.12	2.19e-06
SRM	OK	51.4	-1.41	0.255	2.22e-06
CHD2	OK	382	0.517	0.0937	2.22e-06
EEF1B2	OK	187	-0.784	0.142	2.22e-06
PFDN6	OK	30.8	-1.12	0.203	2.22e-06
TRPC4AP	OK	103	0.489	0.0888	2.34e-06
RSL1D1	OK	129	-0.721	0.131	2.37e-06
MCM2	OK	33.9	-1.58	0.287	2.38e-06
SET	OK	272	-0.618	0.112	2.38e-06
CCT7	OK	200	-0.989	0.18	2.48e-06
SOD1	OK	75.2	-1	0.183	2.54e-06
AHSA1	OK	56.7	-1.15	0.211	2.79e-06
KARS	OK	122	-0.827	0.151	2.84e-06
STARD7	OK	148	-0.591	0.108	2.84e-06
PARP1	OK	148	-0.877	0.161	2.92e-06
PRMT5	OK	35.1	-1.17	0.214	2.92e-06
INPP4B	OK	35.5	-1.26	0.231	2.95e-06
HNRNPA2B1	OK	1050	-0.378	0.0693	2.99e-06
TRAPPC10	OK	156	0.525	0.0964	3.02e-06
TSR1	OK	59.5	-1.05	0.192	3.15e-06
ODC1	OK	102	-1.21	0.222	3.15e-06
WDR36	OK	49.6	-0.922	0.17	3.17e-06
AEBP1	OK	14.2	-1.51	0.279	3.49e-06
RPL3	OK	959	-0.726	0.134	3.64e-06
WDR43	OK	60.9	-0.926	0.171	3.7e-06
MTHFD1	OK	36.7	-1.36	0.253	3.74e-06
RPL29	OK	167	-0.724	0.135	4.14e-06
HSPA9	OK	204	-0.781	0.145	4.33e-06
FTSJ3	OK	77.8	-0.797	0.149	4.48e-06
PARK7	OK	125	-0.733	0.137	4.63e-06
N4BP1	OK	144	0.768	0.143	4.63e-06
BTF3	OK	221	-0.649	0.121	4.63e-06
GNA12	OK	82.2	0.989	0.185	4.63e-06
IARS	OK	123	-1.07	0.199	4.63e-06
EIF5A	OK	265	-0.937	0.175	4.87e-06
IL27RA	OK	67.2	-0.972	0.182	4.87e-06
MRPL3	OK	45.4	-1.1	0.206	4.87e-06
PRDX2	OK	25	-1.16	0.217	5.1e-06
SLC43A2	OK	192	1.19	0.224	5.11e-06
SEH1L	OK	40.9	-0.885	0.166	5.3e-06
USP10	OK	59.8	-0.665	0.125	5.36e-06
IMPDH2	OK	104	-1.08	0.204	5.36e-06
CXCR5	OK	26	-1.32	0.249	5.52e-06
SLC29A1	OK	10.2	-1.76	0.333	5.81e-06
CHIC2	OK	25.9	0.86	0.163	6.08e-06
FNIP1	OK	77.2	0.822	0.155	6.08e-06
VDAC3	OK	65.9	-0.722	0.137	6.12e-06
ATP5B	OK	247	-0.571	0.108	6.2e-06
DDX1	OK	70.3	-0.736	0.139	6.2e-06
PSME3	OK	97.9	-0.715	0.135	6.26e-06
NUDCD1	OK	20.3	-1.03	0.195	6.26e-06
NUTF2	OK	38.3	-1.08	0.206	6.8e-06
CHST2	OK	69.2	1.04	0.198	6.83e-06
EZR	OK	243	-0.416	0.0792	6.99e-06
PAICS	OK	69.8	-1.34	0.256	7.71e-06
EEF1G	OK	369	-0.635	0.121	7.76e-06
ADCY7	OK	164	0.66	0.126	8.3e-06
NABP2	OK	14	-1.29	0.246	8.37e-06
MINA	OK	19.4	-1.13	0.216	8.64e-06
IPO4	OK	34.5	-1.26	0.242	8.9e-06
SRSF3	OK	288	-0.623	0.12	8.96e-06
CHEK1	OK	12.7	-1.61	0.31	9.05e-06
CLEC4E	OK	79.8	1.37	0.263	9.05e-06
TRA2B	OK	110	-0.585	0.113	9.08e-06
SNRPD2	OK	91.2	-0.955	0.184	9.11e-06
APOBR	OK	128	1.25	0.241	9.89e-06
DDX60L	OK	153	1.21	0.234	9.89e-06
CACYBP	OK	59.5	-0.977	0.189	1e-05
PFAS	OK	36.6	-1.32	0.254	1e-05
ATP5C1	OK	45.6	-0.722	0.14	1.01e-05
FMNL1	OK	427	0.609	0.118	1.01e-05
XRCC5	OK	243	-0.575	0.111	1.01e-05
CCT8	OK	139	-0.701	0.136	1.02e-05
RPL10A	OK	290	-0.747	0.145	1.02e-05
PTPRJ	OK	452	0.84	0.163	1.03e-05
SLC25A3	OK	190	-0.576	0.112	1.03e-05
ABCE1	OK	84	-0.917	0.178	1.03e-05
LINC00674	OK	90.2	0.825	0.161	1.22e-05
CISH	OK	56.6	-1.14	0.223	1.32e-05
FASN	OK	127	-1.19	0.233	1.38e-05
RPS8	OK	525	-0.74	0.145	1.44e-05
CCT4	OK	111	-0.924	0.182	1.44e-05
NOP2	OK	56.2	-0.943	0.185	1.45e-05
YBX1	OK	354	-0.596	0.117	1.48e-05
HEATR1	OK	86.7	-0.887	0.175	1.69e-05
MRPL11	OK	15.8	-1.22	0.242	1.71e-05
WDR46	OK	45.4	-0.93	0.184	1.72e-05
WDR3	OK	32.4	-1.06	0.211	1.78e-05
TOMM70A	OK	61.2	-0.824	0.164	1.86e-05
SRSF1	OK	334	-0.482	0.0958	1.92e-05
LINC00085	OK	20	1.42	0.283	1.93e-05
SKI	OK	87.3	0.683	0.136	2e-05
PSAT1	OK	17.2	-1.54	0.308	2e-05
MINOS1	OK	48.1	-0.947	0.189	2.03e-05
TUFM	OK	108	-0.687	0.137	2.04e-05
ARHGAP35	OK	73.7	0.601	0.12	2.07e-05
LTB	OK	95	-1.26	0.253	2.07e-05
POLR1B	OK	32.1	-1.13	0.225	2.11e-05
EXOSC5	OK	13.5	-1.25	0.249	2.13e-05
NHP2L1	OK	48.7	-0.823	0.165	2.13e-05
RPL32	OK	311	-0.676	0.135	2.13e-05
ZBTB16	OK	12.9	1.6	0.32	2.15e-05
TOMM22	OK	45.5	-1	0.201	2.17e-05
PTPN12	OK	178	0.944	0.189	2.21e-05
MAP3K8	OK	122	1.08	0.217	2.35e-05
JHDM1D	OK	193	0.911	0.183	2.35e-05
STRAP	OK	79.2	-0.596	0.12	2.47e-05
FAM193A	OK	53.8	0.584	0.118	2.48e-05
ABHD15	OK	14.6	0.948	0.191	2.51e-05
SEMA7A	OK	73.9	-1.23	0.247	2.52e-05
MRPS27	OK	28	-0.959	0.194	2.56e-05
PDCD11	OK	73.7	-0.879	0.178	2.63e-05
MED13L	OK	192	0.577	0.117	2.63e-05
SLC2A6	OK	84.5	1.13	0.229	2.7e-05
GAB2	OK	88.6	1.15	0.232	2.71e-05
CLUH	OK	66.6	-0.94	0.19	2.73e-05
DHX15	OK	131	-0.571	0.116	2.73e-05
RPS18	OK	645	-0.78	0.158	2.73e-05
WDR77	OK	26.3	-0.94	0.191	2.79e-05
RPS2	OK	498	-0.748	0.152	2.8e-05
SRI	OK	40.3	-0.73	0.148	2.82e-05
UTP14A	OK	28.4	-0.93	0.189	2.84e-05
HNRNPF	OK	220	-0.508	0.103	2.85e-05
BTG1	OK	505	0.914	0.186	2.85e-05
MSH6	OK	53.6	-0.797	0.162	2.85e-05
MCM6	OK	79.6	-1.09	0.221	2.85e-05
C20orf112	OK	52.4	0.756	0.154	2.94e-05
CLASP1	OK	95.5	0.628	0.128	3.01e-05
TBC1D2B	OK	89.3	0.593	0.121	3.2e-05
ZBTB10	OK	43	0.92	0.188	3.36e-05
POLD2	OK	31.3	-1.23	0.252	3.45e-05
PRKDC	OK	273	-0.709	0.145	3.45e-05
ZNF655	OK	118	0.471	0.0966	3.5e-05
APRT	OK	30.6	-1.21	0.248	3.54e-05
RPS21	OK	205	-0.709	0.146	3.54e-05
HSPA6	OK	13	1.68	0.345	3.63e-05
SRP68	OK	80.7	-0.598	0.123	3.65e-05
SKIL	OK	220	0.801	0.165	3.65e-05
NUDC	OK	56	-0.92	0.19	3.82e-05
RPL15	OK	308	-0.553	0.114	3.86e-05
HSPH1	OK	105	-0.918	0.189	3.88e-05
ALDH18A1	OK	30.4	-1.09	0.225	3.89e-05
PCNA	OK	39	-1.07	0.222	3.9e-05
ARHGEF10L	OK	37.6	1.18	0.243	3.98e-05
SORL1	OK	393	0.912	0.189	3.98e-05
SLC26A11	OK	36.4	0.81	0.168	4.2e-05
DMXL2	OK	427	1.38	0.286	4.27e-05
HIPK2	OK	298	0.835	0.173	4.29e-05
ITPR2	OK	197	0.721	0.15	4.33e-05
KIAA0247	OK	308	0.744	0.154	4.33e-05
PPIA	OK	185	-0.692	0.144	4.37e-05
LGALS3	OK	149	0.781	0.162	4.48e-05
MRPL19	OK	32.6	-0.866	0.18	4.5e-05
POLR1A	OK	46.4	-0.992	0.206	4.51e-05
TARS	OK	85	-0.655	0.136	4.59e-05
NDUFB7	OK	19	-1.01	0.211	4.73e-05
ASH1L	OK	246	0.305	0.0638	4.92e-05
MRPL24	OK	20	-1.43	0.298	4.92e-05
WDR75	OK	44.8	-0.92	0.192	4.92e-05
LSM7	OK	29.5	-0.861	0.18	4.96e-05
ZEB2	OK	294	0.938	0.196	4.99e-05
CBX3	OK	111	-0.558	0.117	4.99e-05
ABTB1	OK	32.7	0.959	0.201	5.07e-05
PAN3	OK	79.1	0.586	0.123	5.08e-05
MTHFD1L	OK	31.9	-1.2	0.252	5.08e-05
STIP1	OK	165	-0.998	0.209	5.13e-05
CSE1L	OK	62.5	-0.672	0.141	5.13e-05
GARS	OK	85.1	-0.73	0.153	5.25e-05
FAM193B	OK	99.5	0.625	0.131	5.42e-05
C15orf48	OK	275	1.24	0.26	5.44e-05
FBXO41	OK	24.3	-0.953	0.2	5.44e-05
HNRNPA3	OK	375	-0.435	0.0917	5.77e-05
MRPL51	OK	30.8	-1.08	0.227	5.89e-05
FAM49A	OK	73.6	0.788	0.166	6.08e-05
N4BP2L2-IT2	OK	30	0.855	0.181	6.22e-05
CCND2	OK	436	-1.12	0.238	6.33e-05
ATG7	OK	45.5	0.945	0.2	6.34e-05
IDH3A	OK	37.9	-0.851	0.18	6.35e-05
NHP2	OK	37.7	-1.21	0.255	6.35e-05
PLCG2	OK	64.4	0.716	0.152	6.56e-05
TRPS1	OK	48.9	1.12	0.238	6.56e-05
YPEL1	OK	38	1.31	0.278	6.62e-05
TUBA1B	OK	268	-1	0.213	6.63e-05
CREBBP	OK	198	0.633	0.134	6.63e-05
QKI	OK	189	0.804	0.171	6.63e-05
TMEM164	OK	49.3	0.72	0.153	6.64e-05
SLC38A5	OK	25.3	-1.18	0.25	6.67e-05
ZFAND3	OK	80.7	0.691	0.147	6.68e-05
BYSL	OK	18.2	-1.36	0.288	6.68e-05
FAM160A2	OK	37.8	0.786	0.167	6.72e-05
AKAP1	OK	21.6	-0.963	0.205	6.72e-05
SUB1	OK	115	-0.639	0.136	6.72e-05
GART	OK	69.8	-0.863	0.184	7.11e-05
SMYD5	OK	17.3	-1.01	0.216	7.12e-05
CIRH1A	OK	35.9	-0.929	0.198	7.21e-05
EIF3E	OK	183	-0.658	0.141	7.35e-05
ATP6AP1	OK	94.3	0.88	0.188	7.4e-05
IFRD2	OK	29	-1.04	0.223	7.56e-05
SPON2	OK	11.7	1.72	0.368	7.6e-05
RLTPR	OK	73	-0.802	0.172	7.85e-05
SMCR8	OK	124	0.564	0.121	7.85e-05
BMS1	OK	58.8	-0.877	0.188	7.87e-05
GTF3A	OK	56.1	-0.703	0.151	8.19e-05
ARHGAP26	OK	102	0.817	0.176	8.19e-05
TCIRG1	OK	268	0.849	0.183	8.58e-05
NASP	OK	98	-0.642	0.138	8.78e-05
RPS9	OK	481	-0.449	0.0969	8.86e-05
LRRC8B	OK	28	-0.81	0.175	9.25e-05
HNRNPR	OK	176	-0.551	0.119	9.33e-05
NDFIP2	OK	30.1	-1.43	0.31	9.41e-05
SNRPA1	OK	26	-0.939	0.203	9.41e-05
RPS11	OK	856	-0.599	0.13	9.6e-05
EEF2	OK	1160	-0.306	0.0664	9.73e-05
AKAP17A	OK	126	0.435	0.0944	9.75e-05
TUBB	OK	386	-0.819	0.178	9.79e-05
PSEN1	OK	123	0.675	0.147	9.92e-05
PLEKHA2	OK	186	0.65	0.141	9.92e-05
PIK3R1	OK	259	0.818	0.178	9.94e-05
RXRA	OK	86.5	1.05	0.227	9.94e-05
SIK3	OK	79.6	0.706	0.153	0.0001
CREG1	OK	69	1.02	0.223	0.000102
SLC11A2	OK	112	0.914	0.199	0.000107
EED	OK	41.2	-0.839	0.183	0.000109
HSD17B10	OK	27.6	-1.05	0.229	0.000111
GTPBP4	OK	65.1	-0.808	0.177	0.000113
PIK3R5	OK	313	0.975	0.213	0.000113
RPF2	OK	17.6	-1.09	0.239	0.000114
TFB2M	OK	10.8	-1.19	0.261	0.000129
DPP3	OK	39.5	-0.974	0.214	0.000129
BATF	OK	43.7	-0.961	0.212	0.000134
HNRPDL	OK	293	-0.494	0.109	0.000134
FOXP3	OK	22.4	-1.23	0.272	0.000134
RRP15	OK	27.8	-0.985	0.217	0.000135
TANC2	OK	19.9	1.22	0.269	0.000135
SLC5A6	OK	31.5	-0.932	0.206	0.000135
MCTP1	OK	35	1.1	0.244	0.000135
HARS	OK	58.8	-0.716	0.158	0.000135
PRKAR1B	OK	11.8	-1.23	0.271	0.000136
NDUFB3	OK	17.7	-1	0.221	0.000138
GAR1	OK	24.5	-1.13	0.249	0.000138
RARS	OK	56.9	-0.751	0.166	0.00014
TTC1	OK	43.2	-0.663	0.147	0.000141
SH2D1B	OK	37.5	1.46	0.324	0.000143
HNRNPC	OK	265	-0.476	0.106	0.000143
YWHAB	OK	308	-0.361	0.08	0.000146
LYAR	OK	35.2	-0.963	0.214	0.000146
LOC374443	OK	84.7	0.823	0.183	0.000147
CTSD	OK	244	1.05	0.234	0.000151
CORO1A	OK	283	-0.716	0.159	0.000152
NR3C1	OK	288	0.646	0.144	0.000155
WDR12	OK	20.8	-1.13	0.253	0.000156
RRP1B	OK	60.1	-0.753	0.168	0.000156
MXD4	OK	32.1	0.994	0.221	0.000156
UTRN	OK	207	0.859	0.191	0.000156
MDM2	OK	150	0.7	0.156	0.000159
RPL28	OK	484	-0.551	0.123	0.00016
ERBB2IP	OK	156	0.493	0.11	0.00016
ENC1	OK	21	1.19	0.267	0.00016
AUTS2	OK	59	1.31	0.292	0.00016
ECHDC1	OK	40.3	-0.639	0.143	0.000162
TOMM6	OK	42.7	-0.886	0.198	0.000164
EXOSC8	OK	21.8	-0.923	0.206	0.000166
RPL22	OK	157	-0.68	0.152	0.000167
TET3	OK	99.9	0.563	0.126	0.000168
EPRS	OK	116	-0.825	0.185	0.000169
RPS27A	OK	350	-0.63	0.141	0.000169
MRPS26	OK	11.4	-1.12	0.251	0.000169
RPS12	OK	487	-0.669	0.15	0.00017
TOMM5	OK	23.9	-0.904	0.203	0.00017
C1orf21	OK	61.7	1.2	0.268	0.000172
PFKM	OK	10.8	-1.2	0.269	0.000176
HIPK1	OK	161	0.473	0.106	0.000177
CD2	OK	139	-0.939	0.211	0.000177
DDX21	OK	264	-0.838	0.188	0.000177
DLAT	OK	26.7	-0.874	0.196	0.000177
MRPL15	OK	14.8	-1	0.225	0.000177
SMAD7	OK	51.2	0.895	0.201	0.000178
CARM1	OK	23.7	-0.797	0.179	0.000178
MTMR3	OK	123	0.834	0.188	0.000181
TFEC	OK	82.9	0.871	0.196	0.000181
PIK3AP1	OK	346	1.06	0.24	0.000183
DPYD	OK	103	1.22	0.276	0.000186
TIMM21	OK	11	-1.09	0.246	0.00019
EEF1A1	OK	2510	-0.412	0.0932	0.000192
MGAT1	OK	200	0.8	0.181	0.000193
SRSF7	OK	127	-0.522	0.118	0.000201
N4BP2	OK	55.3	0.763	0.173	0.000202
SERPINA1	OK	302	1.15	0.26	0.000204
TOMM7	OK	55	-0.76	0.172	0.000205
DPH2	OK	23.9	-1.2	0.273	0.000209
ACAT1	OK	13.2	-1.13	0.257	0.000209
GNS	OK	225	0.736	0.167	0.000209
CAD	OK	58	-1.08	0.246	0.000209
TSN	OK	57.3	-0.574	0.131	0.000212
RPS23	OK	613	-0.663	0.151	0.000212
EIF3B	OK	140	-0.628	0.143	0.000215
RPL26	OK	277	-0.595	0.135	0.000216
ADAM10	OK	171	0.631	0.144	0.00022
DENND4B	OK	161	0.512	0.117	0.000221
HSP90AA1	OK	981	-0.88	0.201	0.000221
C17orf76-AS1	OK	137	-0.727	0.166	0.000221
GRWD1	OK	31.7	-0.908	0.207	0.000221
PNO1	OK	22.3	-0.957	0.218	0.000221
SESTD1	OK	37.3	0.93	0.212	0.000221
UBN2	OK	61.4	0.687	0.157	0.000221
PWP1	OK	32.7	-0.782	0.179	0.000231
CFLAR	OK	535	0.447	0.102	0.000233
MDH2	OK	50.9	-0.687	0.157	0.000234
HNRNPA1	OK	39.6	-0.722	0.165	0.000235
TOR4A	OK	32.3	0.831	0.19	0.000235
PPP1CC	OK	114	-0.615	0.141	0.00024
ATP5F1	OK	56.5	-0.685	0.157	0.000242
SNRPD3	OK	50.8	-0.739	0.169	0.000244
MNF1	OK	13.3	-1.13	0.259	0.000247
RPL10	OK	424	-0.457	0.105	0.000247
RPL23	OK	543	-0.636	0.146	0.00025
UBA5	OK	30.8	-0.73	0.168	0.00025
NOC2L	OK	58.6	-0.884	0.203	0.000254
HS3ST3B1	OK	37.1	1.15	0.266	0.000255
RPL23A	OK	208	-0.586	0.135	0.000261
EIF5B	OK	135	-0.722	0.166	0.000263
MARCKS	OK	522	1.17	0.269	0.000263
AGXT2L2	OK	27.2	0.689	0.159	0.000265
WDFY3	OK	57.9	1.26	0.29	0.000266
ITPRIP	OK	67.9	0.748	0.173	0.000268
SLC25A6	OK	224	-0.493	0.114	0.000268
CLCN7	OK	127	0.866	0.2	0.00027
SACS	OK	92.8	-0.628	0.145	0.000273
COL4A3BP	OK	83.6	0.588	0.136	0.000273
DDX39A	OK	104	-0.668	0.154	0.000274
FLCN	OK	56.2	0.603	0.14	0.000278
WBP2	OK	88	0.588	0.136	0.000278
MCM5	OK	51.5	-0.974	0.225	0.000278
PSMD11	OK	103	-0.53	0.123	0.000281
EP300	OK	209	0.43	0.0997	0.000281
PRPS1	OK	54.1	-0.702	0.163	0.000281
GRINA	OK	172	0.944	0.219	0.000284
DENND5A	OK	199	1.11	0.258	0.000285
SLC35E3	OK	10.6	1.1	0.254	0.000289
C10orf2	OK	21.1	-1.02	0.237	0.000295
LEO1	OK	26.1	-0.877	0.204	0.000298
PILRA	OK	64.7	0.968	0.225	0.0003
DNAJC5	OK	150	0.625	0.145	0.000301
PPIH	OK	18.4	-1.01	0.235	0.000302
MRPS23	OK	21.9	-0.936	0.218	0.000303
SLC1A5	OK	50.5	-0.885	0.206	0.000305
SUN2	OK	256	0.704	0.164	0.000312
PPIL1	OK	17	-1.13	0.264	0.000313
PRPF8	OK	363	-0.465	0.108	0.000316
RPS16	OK	496	-0.569	0.133	0.000316
MGAT5	OK	80.8	0.63	0.147	0.000316
KIF13A	OK	28.8	1.04	0.242	0.000316
LARS	OK	104	-0.692	0.162	0.000321
TET2	OK	144	0.782	0.183	0.000328
AGPAT4-IT1	OK	13.7	1.28	0.3	0.000331
IRAK2	OK	114	1.11	0.26	0.000336
ANAPC1	OK	44.1	-0.927	0.217	0.000339
SNRPE	OK	26.7	-0.953	0.224	0.000343
TUBA4A	OK	31.3	-0.768	0.18	0.000345
ZNF292	OK	174	0.787	0.185	0.000346
LAMTOR5	OK	47.9	-0.728	0.171	0.000348
CUL2	OK	38.2	-0.681	0.16	0.000354
MCM3	OK	51.1	-0.885	0.208	0.000357
GGCT	OK	16	-1.08	0.255	0.000361
SNRPF	OK	30.4	-0.956	0.225	0.000365
MYBBP1A	OK	69.3	-0.88	0.207	0.000365
BCAT2	OK	10.7	-1.23	0.29	0.000365
PNPT1	OK	33.9	-0.961	0.226	0.000365
ALCAM	OK	106	0.859	0.203	0.000365
MDN1	OK	178	-0.576	0.136	0.000365
LOC100216546	OK	26	0.848	0.2	0.000365
VPS37C	OK	41.4	0.857	0.202	0.000367
KANSL1	OK	86.1	0.444	0.105	0.000367
HEMK1	OK	16.8	-0.941	0.222	0.000367
NUDT21	OK	90.6	-0.549	0.13	0.000368
SNHG3	OK	76.2	-0.865	0.204	0.00037
KDM5A	OK	181	0.306	0.0723	0.00037
DUSP3	OK	55.5	0.891	0.21	0.00037
PWP2	OK	43.8	-0.722	0.171	0.000374
SRRM2	OK	1290	0.376	0.0889	0.000376
CRLS1	OK	16.8	-0.876	0.207	0.000379
HOOK3	OK	135	0.539	0.127	0.000379
NOP58	OK	112	-0.582	0.138	0.000383
WDR4	OK	21.4	-0.986	0.233	0.000383
PSMB6	OK	56.3	-0.762	0.181	0.000392
PGAM5	OK	29.5	-0.859	0.204	0.000393
HMGA1	OK	86.4	-0.829	0.197	0.0004
SRPK1	OK	56.8	-0.556	0.132	0.000406
RANGAP1	OK	91.3	-0.716	0.17	0.000411
NDUFS6	OK	26.7	-0.939	0.223	0.000416
CD68	OK	287	0.991	0.236	0.000418
SNX5	OK	41.1	-0.664	0.158	0.000418
E2F3	OK	55.2	0.531	0.127	0.000424
CSGALNACT2	OK	172	0.861	0.205	0.000426
IFNGR2	OK	114	1.13	0.27	0.000426
ADTRP	OK	10.5	-1.24	0.296	0.000426
SARS	OK	96.9	-0.447	0.106	0.000429
CD320	OK	13	-1.17	0.279	0.000429
MLL3	OK	310	0.471	0.112	0.000436
AP1S2	OK	44.1	0.925	0.221	0.00044
ATP5J	OK	27	-0.68	0.163	0.000452
LYN	OK	455	0.841	0.201	0.000457
PELP1	OK	57	-0.64	0.153	0.000458
FAM53B	OK	84.9	0.687	0.165	0.00046
WEE1	OK	11.3	-1.25	0.301	0.00046
LMNB2	OK	79.2	-0.813	0.195	0.00046
ACTL6A	OK	29.7	-1	0.24	0.00046
POLR2H	OK	17.8	-1.02	0.245	0.00046
EIF1AX	OK	45.5	-0.888	0.213	0.00046
ATP8B4	OK	36.4	0.885	0.212	0.000469
METRNL	OK	89.4	0.847	0.203	0.000472
NAA15	OK	79.3	-0.836	0.201	0.000473
EIF2B3	OK	11.4	-1.15	0.275	0.000474
AGO4	OK	65.4	0.691	0.166	0.000482
FDFT1	OK	83.1	-0.751	0.181	0.00049
SAMD8	OK	69.9	0.519	0.125	0.000493
SBF2	OK	32.3	0.856	0.206	0.000493
SHMT2	OK	58.3	-0.895	0.215	0.000493
RPL31	OK	376	-0.543	0.131	0.000493
FASTKD2	OK	35.4	-0.701	0.169	0.000493
SAAL1	OK	11.6	-0.98	0.236	0.000497
IFNAR1	OK	138	0.841	0.203	0.000499
MRPS35	OK	25.9	-0.751	0.181	0.000501
TFAM	OK	45.9	-0.659	0.159	0.000503
EIF2S2	OK	66.5	-0.645	0.156	0.000503
SLC39A14	OK	24.6	-1.01	0.243	0.000503
PINK1	OK	14.2	0.974	0.235	0.000511
UBA2	OK	79.4	-0.501	0.121	0.000511
SPIB	OK	16.7	-1.13	0.272	0.000512
SF3B3	OK	106	-0.608	0.147	0.000513
ETFA	OK	34	-0.746	0.18	0.000515
WTAP	OK	237	0.806	0.195	0.000515
TARBP1	OK	26.4	-0.875	0.212	0.000517
WDHD1	OK	12.9	-1.11	0.269	0.000518
MB21D2	OK	23.5	1.09	0.263	0.000518
GFOD1	OK	14.8	1.26	0.305	0.000528
MAK16	OK	31.8	-0.708	0.172	0.000534
TRIM36	OK	13	1.14	0.277	0.000537
UBE2H	OK	70.4	0.544	0.132	0.000539
HDAC2	OK	64.1	-0.589	0.143	0.00054
ZFYVE28	OK	18.4	1.03	0.249	0.000543
CSNK2A1	OK	43.4	-0.634	0.154	0.000545
PDAP1	OK	90.5	-0.563	0.137	0.000546
C11orf48	OK	27.7	-0.797	0.194	0.000547
TCF7L2	OK	17.3	1.21	0.293	0.000549
DNM2	OK	211	0.492	0.119	0.000551
STK10	OK	211	0.54	0.131	0.00056
NME2	OK	31.2	-0.941	0.229	0.000566
MRPS34	OK	22.2	-0.939	0.229	0.000575
NOL11	OK	44.7	-0.677	0.165	0.000581
MCM4	OK	34	-1.31	0.319	0.000583
TCERG1	OK	84.1	-0.53	0.129	0.000588
MAML1	OK	84.4	0.522	0.127	0.000588
NSA2	OK	93.2	-0.592	0.144	0.000589
N4BP2L2	OK	131	0.419	0.102	0.000596
BRIX1	OK	24.8	-0.979	0.239	0.000596
PSMC2	OK	75.6	-0.55	0.134	0.000596
G3BP1	OK	150	-0.574	0.14	0.000599
ASAP1	OK	185	0.89	0.218	0.0006
ERGIC1	OK	116	0.797	0.195	0.00061
CSK	OK	187	-0.418	0.102	0.000611
MRPL4	OK	22.4	-0.908	0.222	0.000619
ERH	OK	95.5	-0.687	0.168	0.000625
RPL27A	OK	301	-0.537	0.132	0.00063
SLC7A7	OK	119	1.08	0.265	0.000636
FLT3LG	OK	20.1	-1.06	0.261	0.000636
ZSWIM6	OK	37	0.878	0.215	0.000636
BTN2A1	OK	77.7	0.612	0.15	0.000636
RASA3	OK	121	0.83	0.204	0.000641
PSMD1	OK	117	-0.641	0.157	0.000641
ATXN1	OK	178	0.716	0.176	0.000641
TMEM120A	OK	34.4	1.04	0.256	0.000641
PTTG1IP	OK	123	0.73	0.179	0.000642
KNTC1	OK	32.6	-0.765	0.188	0.000646
RHOU	OK	91.5	0.986	0.243	0.000648
ACP2	OK	34.4	0.925	0.228	0.000648
PUS1	OK	23.2	-0.99	0.244	0.000648
NUP93	OK	34.7	-0.762	0.187	0.000648
KIAA0513	OK	24.6	0.957	0.236	0.000648
PDXK	OK	182	0.883	0.217	0.000648
PPRC1	OK	62.3	-0.683	0.168	0.00065
VHL	OK	118	0.47	0.116	0.00065
FUBP1	OK	165	-0.551	0.136	0.000657
MRPL17	OK	13.3	-1.06	0.262	0.000657
DNMT3A	OK	45.8	-0.761	0.188	0.000665
DAZAP1	OK	107	-0.485	0.12	0.000674
INSIG2	OK	40.8	0.919	0.227	0.000678
RAPGEF1	OK	567	0.458	0.113	0.000678
PSMA2	OK	103	-0.683	0.169	0.000689
LAMP2	OK	113	0.538	0.133	0.000691
TTC27	OK	22.5	-0.861	0.213	0.000698
HNRNPM	OK	252	-0.58	0.144	0.000703
COX7C	OK	91.2	-0.634	0.157	0.000703
PCNX	OK	264	0.527	0.13	0.000708
SGPL1	OK	98.3	0.691	0.171	0.00071
ADA	OK	60.3	0.953	0.236	0.000717
PTGES3	OK	173	-0.525	0.13	0.000722
HDAC1	OK	132	-0.429	0.106	0.000724
ATP5H	OK	44.7	-0.66	0.164	0.000742
KBTBD2	OK	68.8	0.499	0.124	0.000742
BMPR2	OK	71.1	0.547	0.136	0.000743
HNRNPK	OK	478	-0.3	0.0746	0.000743
BZW2	OK	16	-1.08	0.269	0.000745
RPL8	OK	676	-0.504	0.125	0.000747
GM2A	OK	98.9	1.08	0.27	0.00075
MAP2K1	OK	110	0.854	0.213	0.000756
DAPK1	OK	84.9	1.07	0.267	0.000763
PES1	OK	64.1	-0.755	0.188	0.000767
RSL24D1	OK	80.8	-0.506	0.126	0.000777
NBEAL2	OK	205	0.676	0.169	0.00078
LAPTM4A	OK	102	0.691	0.172	0.000783
TTLL12	OK	20.4	-1.02	0.255	0.000796
RPS4X	OK	599	-0.659	0.164	0.000796
ZCCHC6	OK	109	0.527	0.132	0.000803
RNF144B	OK	220	1.16	0.29	0.000805
CHST11	OK	154	0.775	0.194	0.000822
UBA52	OK	257	-0.348	0.087	0.000823
CHST12	OK	15.3	1.01	0.254	0.000832
ATP5G1	OK	18.9	-1.03	0.259	0.000836
MED13	OK	231	0.444	0.111	0.000836
PDK1	OK	44.7	1.12	0.281	0.000836
LRCH4	OK	95.3	0.55	0.138	0.000836
TSTA3	OK	22.3	-0.772	0.194	0.000837
RASSF4	OK	62.6	0.92	0.231	0.000838
EIF2S1	OK	86.1	-0.641	0.161	0.000843
HAVCR2	OK	92.8	0.959	0.241	0.000852
RPL13	OK	484	-0.527	0.132	0.000853
DDX24	OK	136	-0.409	0.103	0.000865
GPR84	OK	35.2	1.26	0.316	0.000866
PPARA	OK	38.9	0.644	0.162	0.000869
UQCRH	OK	49.9	-0.656	0.165	0.000875
DHX9	OK	233	-0.559	0.141	0.000875
DDX51	OK	27.5	-0.678	0.171	0.000875
SIPA1L3	OK	57.8	0.664	0.167	0.000875
SDCBP	OK	231	0.936	0.235	0.000875
CHST15	OK	60.3	1.11	0.28	0.000877
EIF3L	OK	115	-0.533	0.134	0.000877
TP53	OK	56.1	-0.729	0.184	0.000882
CAPRIN1	OK	145	-0.452	0.114	0.000901
GTF2H3	OK	25.2	-0.734	0.185	0.000908
FAM136A	OK	25.2	-0.678	0.171	0.000918
LCK	OK	120	-0.738	0.186	0.000922
NSMCE1	OK	16	-0.954	0.241	0.000928
SEMA3C	OK	21.5	1.39	0.352	0.000928
TBC1D2	OK	25.8	1.14	0.289	0.000928
SRC	OK	284	0.891	0.225	0.000934
NUP107	OK	43.6	-0.671	0.17	0.000937
DUSP10	OK	69.9	0.844	0.214	0.000951
FTH1	OK	3660	0.961	0.243	0.000951
OLA1	OK	38	-0.756	0.191	0.000951
SLC15A3	OK	63.5	0.859	0.218	0.000958
PUS7	OK	14.5	-1.07	0.271	0.000958
PLEKHM1P	OK	15.3	0.959	0.243	0.000961
ELL	OK	76.6	0.898	0.228	0.000988
RPS13	OK	289	-0.58	0.148	0.00101
RPL37	OK	336	-0.556	0.141	0.00101
C1orf122	OK	37.5	1	0.255	0.00102
TEP1	OK	139	0.44	0.112	0.00102
RPLP1	OK	576	-0.475	0.121	0.00102
KDM4B	OK	65.8	0.671	0.171	0.00102
CTSS	OK	479	0.684	0.174	0.00103
AFF1	OK	131	0.454	0.116	0.00103
RP2	OK	58.7	0.834	0.212	0.00103
VAV3	OK	28.2	0.821	0.209	0.00104
FAM102B	OK	47.9	0.848	0.216	0.00104
ADRBK1	OK	268	0.366	0.0934	0.00104
ANPEP	OK	424	0.988	0.252	0.00104
KIAA0020	OK	36.5	-0.933	0.238	0.00105
ZMYND8	OK	39.6	0.58	0.148	0.00106
CD40LG	OK	11.6	-1.26	0.321	0.00106
LTV1	OK	36	-0.792	0.203	0.00107
ABCB1	OK	23.5	0.975	0.249	0.00107
ATXN1L	OK	87.4	0.424	0.108	0.00108
TXNL4A	OK	31.6	-0.67	0.171	0.00108
C19orf70	OK	16.3	-0.986	0.252	0.00108
PION	OK	64.4	0.789	0.202	0.00108
IQGAP1	OK	626	0.445	0.114	0.00109
NOTCH2NL	OK	85.6	0.859	0.22	0.0011
SCFD2	OK	12.4	-1.06	0.271	0.0011
ADH5	OK	34.8	-0.639	0.164	0.0011
SNRPC	OK	24.2	-0.787	0.202	0.00111
TRUB2	OK	10.7	-1.01	0.259	0.00111
FAU	OK	221	-0.451	0.116	0.00112
MGST1	OK	14	1.38	0.355	0.00112
KYNU	OK	166	0.847	0.217	0.00112
FADS3	OK	10.4	1.05	0.271	0.00113
ARRB1	OK	76.6	0.623	0.16	0.00113
HPRT1	OK	24.7	-0.828	0.213	0.00113
PNPLA2	OK	41.6	0.717	0.184	0.00116
RPL41	OK	429	-0.544	0.14	0.00116
GNPNAT1	OK	15.9	-0.827	0.213	0.00116
KIAA0232	OK	66.4	0.535	0.138	0.00116
TCOF1	OK	84.4	-0.569	0.146	0.00116
RNPS1	OK	75.8	-0.592	0.152	0.00117
DOCK4	OK	372	0.983	0.253	0.00117
DTX2	OK	20.5	1.06	0.272	0.00118
RPS25	OK	281	-0.618	0.16	0.0012
PDE4A	OK	75.7	0.98	0.253	0.0012
MKI67IP	OK	25	-0.882	0.228	0.0012
IL17RA	OK	140	0.976	0.252	0.0012
OSTM1	OK	74.3	0.59	0.152	0.0012
RPL30	OK	448	-0.513	0.132	0.0012
TGFBR1	OK	94.5	0.698	0.18	0.0012
GLRX3	OK	38.2	-0.546	0.141	0.00121
FMN1	OK	46.7	1.27	0.327	0.00121
RYR1	OK	18.1	-1.27	0.329	0.00121
RRP9	OK	18.6	-0.969	0.25	0.00121
C3AR1	OK	80.7	1.3	0.336	0.00122
PPIF	OK	123	0.767	0.199	0.00123
PEBP1	OK	50.5	-0.848	0.219	0.00123
ADPGK	OK	97.5	0.625	0.162	0.00124
PLA2G7	OK	117	0.924	0.239	0.00124
FLJ43663	OK	53.1	0.559	0.145	0.00124
UBE2G2	OK	90.3	-0.467	0.121	0.00125
SNHG1	OK	53.3	-0.659	0.171	0.00126
RNF130	OK	62.8	0.978	0.254	0.00126
RPLP2	OK	386	-0.521	0.135	0.00127
KIAA1109	OK	208	0.401	0.104	0.00127
SYK	OK	110	0.92	0.239	0.00127
EMILIN2	OK	227	0.956	0.248	0.00128
ARRB2	OK	149	0.644	0.167	0.00129
TIMM50	OK	22.4	-0.935	0.243	0.00129
SYNCRIP	OK	185	-0.493	0.128	0.00129
SEC22B	OK	104	0.462	0.12	0.0013
SYNGR2	OK	118	-0.425	0.11	0.0013
MRPS18C	OK	24.8	-0.758	0.197	0.0013
SIGMAR1	OK	11.9	-1.03	0.267	0.0013
RPL11	OK	618	-0.544	0.142	0.00131
VPS37B	OK	54	0.61	0.159	0.00131
SNRPA	OK	34.1	-0.735	0.191	0.00131
PNRC1	OK	275	0.87	0.226	0.00131
PTGIR	OK	38.2	0.97	0.253	0.00132
CCNC	OK	30.1	-0.707	0.184	0.00132
CEP170	OK	95.3	0.911	0.237	0.00133
TATDN1	OK	10.6	-1.01	0.262	0.00133
NOL6	OK	52.8	-0.798	0.208	0.00134
MR1	OK	55.7	0.564	0.147	0.00135
KIAA0556	OK	26.8	0.706	0.184	0.00135
PREX1	OK	296	0.51	0.133	0.00135
MRPL32	OK	22.2	-0.76	0.198	0.00135
TYROBP	OK	123	0.902	0.235	0.00136
NOP14	OK	68	-0.801	0.209	0.00136
AKNA	OK	404	0.498	0.13	0.00137
LAT	OK	91.2	-0.816	0.213	0.00138
MRPL35	OK	20.3	-0.771	0.201	0.00138
ITGB1	OK	193	0.646	0.169	0.00139
NLRP3	OK	87.7	1.22	0.319	0.0014
SLC35F2	OK	21.3	-0.836	0.219	0.0014
PAK1IP1	OK	15.5	-0.919	0.241	0.0014
USP7	OK	175	-0.3	0.0787	0.00141
SLC16A1	OK	26.8	-0.958	0.251	0.00142
EHBP1L1	OK	371	0.621	0.163	0.00142
TFE3	OK	78.9	0.571	0.15	0.00142
EAF1	OK	124	0.826	0.217	0.00143
CD6	OK	159	-0.692	0.182	0.00144
MTIF2	OK	25	-0.664	0.174	0.00144
PSMD14	OK	47.2	-0.754	0.198	0.00144
TBL3	OK	23.9	-0.797	0.209	0.00146
AP1AR	OK	21	-0.769	0.202	0.00147
RABEPK	OK	10.4	-1.01	0.265	0.00147
DKFZP586I1420	OK	54.7	0.932	0.245	0.00148
POLR3D	OK	15.4	-0.857	0.226	0.0015
CTPS1	OK	33.6	-0.87	0.229	0.00151
MRPS7	OK	23.4	-0.975	0.257	0.00151
JAK1	OK	314	0.363	0.0957	0.00152
NCF2	OK	244	1.01	0.266	0.00152
SLC7A1	OK	93.5	-0.723	0.191	0.00152
EFHD2	OK	184	0.58	0.153	0.00153
MRPL20	OK	34.2	-0.678	0.179	0.00154
NAP1L1	OK	482	-0.484	0.128	0.00154
CCNDBP1	OK	40.9	0.576	0.152	0.00154
DANCR	OK	13.2	-0.875	0.231	0.00154
GRSF1	OK	63.2	-0.487	0.129	0.00154
NXF1	OK	171	0.575	0.152	0.00155
43709	OK	71	-0.678	0.179	0.00155
PNPO	OK	13.7	-1.03	0.272	0.00155
NOL7	OK	44.5	-0.548	0.145	0.00155
CMIP	OK	120	0.566	0.15	0.0016
DDX54	OK	69.4	-0.593	0.157	0.00161
PRPF31	OK	54.4	-0.602	0.159	0.00161
SERINC3	OK	73.1	0.553	0.146	0.00161
LOC399715	OK	10.7	1.18	0.313	0.00162
IMP4	OK	25.1	-0.885	0.234	0.00162
RASSF3	OK	91.6	0.525	0.139	0.00164
PTPN11	OK	128	-0.418	0.111	0.00166
RBMX	OK	153	-0.498	0.132	0.00166
MAPKAPK2	OK	138	0.493	0.131	0.00168
NUP160	OK	74.8	-0.464	0.123	0.00168
SF3A3	OK	73.5	-0.628	0.167	0.0017
SLC6A6	OK	206	0.7	0.186	0.0017
STARD3	OK	53.7	0.451	0.12	0.00172
PPAT	OK	14.4	-1.07	0.286	0.00173
NOC3L	OK	25.8	-0.753	0.201	0.00174
SLC9A8	OK	55.4	0.658	0.175	0.00174
STK40	OK	88.8	0.461	0.123	0.00175
ST3GAL2	OK	103	0.827	0.221	0.00175
RHBDF2	OK	69.1	0.626	0.167	0.00175
CCNG2	OK	42.5	1.01	0.269	0.00176
AOAH	OK	94.7	0.957	0.255	0.00176
PSMD13	OK	86.8	-0.546	0.146	0.00177
NOL10	OK	31.9	-0.644	0.172	0.00177
FGR	OK	102	0.844	0.225	0.00178
CTBP2	OK	22.7	0.954	0.255	0.00178
OGFRL1	OK	39.7	1.02	0.272	0.00178
ARHGEF11	OK	56.7	0.946	0.253	0.00179
RBM8A	OK	109	-0.478	0.128	0.00181
RPS15A	OK	306	-0.576	0.154	0.00181
DNAJC9	OK	21.2	-0.858	0.229	0.00182
DUS1L	OK	49.2	-0.629	0.168	0.00182
C22orf28	OK	49.6	-0.54	0.144	0.00182
METTL5	OK	13.7	-0.875	0.234	0.00184
MAGOH	OK	58.7	-0.74	0.198	0.00185
RPL36	OK	138	-0.67	0.18	0.00185
RPL12	OK	298	-0.622	0.167	0.00185
GSTP1	OK	57.1	-0.583	0.156	0.00186
RNF169	OK	70.6	0.452	0.121	0.00186
OS9	OK	218	0.53	0.142	0.00186
ZNF609	OK	72.9	0.395	0.106	0.00186
PPM1G	OK	80.7	-0.569	0.153	0.00186
OCIAD2	OK	22.6	-0.689	0.185	0.00186
NIP7	OK	35.4	-0.748	0.201	0.00188
DIP2A	OK	94.2	0.825	0.222	0.00188
SS18L2	OK	14.6	-0.829	0.223	0.00188
AGTRAP	OK	14.3	0.979	0.263	0.00189
EZH1	OK	80.6	0.493	0.132	0.00189
GMPS	OK	35.3	-0.684	0.184	0.00189
KIAA1147	OK	145	0.662	0.178	0.00189
RABGGTB	OK	74.7	-0.621	0.167	0.00193
LSM6	OK	27.5	-0.833	0.224	0.00193
PSD3	OK	22.5	0.952	0.256	0.00193
PMVK	OK	14.7	-0.913	0.246	0.00194
BANF1	OK	61.9	-0.712	0.192	0.00194
WIPF2	OK	83.3	0.449	0.121	0.00194
NINJ1	OK	161	0.853	0.23	0.00194
TLN1	OK	744	0.5	0.135	0.00195
NID1	OK	11.4	1.23	0.331	0.00196
BCCIP	OK	40.2	-0.655	0.177	0.00196
KPNB1	OK	406	-0.38	0.102	0.00196
RPL35A	OK	272	-0.564	0.152	0.00196
ZNF710	OK	42	0.735	0.198	0.00197
IL32	OK	149	-1	0.27	0.00198
ZNF652	OK	60.9	0.753	0.203	0.002
MTF1	OK	176	0.76	0.205	0.00201
TRANK1	OK	151	0.739	0.2	0.00201
DCAF13	OK	29.5	-0.877	0.237	0.00201
DOCK8	OK	296	0.498	0.135	0.00202
FMNL3	OK	249	0.753	0.204	0.00204
RLF	OK	78.8	0.752	0.204	0.00206
SRGN	OK	699	0.647	0.175	0.00206
MON2	OK	114	0.4	0.108	0.00206
PLXNC1	OK	103	0.9	0.244	0.00206
GLG1	OK	164	0.487	0.132	0.00206
EXOSC9	OK	25.6	-0.678	0.184	0.00206
MFAP3	OK	38.1	0.568	0.154	0.00206
MGC39372	OK	17.8	1.37	0.372	0.00206
MAGOHB	OK	12.9	-1.09	0.295	0.00207
CLPP	OK	21	-0.738	0.2	0.00207
NFAM1	OK	20.2	1.25	0.34	0.00207
SERINC1	OK	226	0.574	0.156	0.00207
MLL5	OK	339	0.414	0.112	0.00207
CDC42SE1	OK	253	0.397	0.108	0.00208
MPP1	OK	37.8	1.12	0.304	0.00208
SPI1	OK	85.5	0.885	0.24	0.00209
CAPRIN2	OK	28.4	0.668	0.181	0.00209
TRAF4	OK	75.4	-1.07	0.29	0.00209
TBC1D8	OK	14.6	1.05	0.286	0.0021
KIAA2018	OK	123	0.488	0.133	0.0021
TMEM127	OK	88.7	0.562	0.153	0.00211
MRPL13	OK	11.2	-1	0.272	0.00211
TRMT112	OK	63.4	-0.689	0.187	0.00212
PSMA5	OK	118	-0.669	0.182	0.00216
MDM4	OK	244	0.426	0.116	0.00216
STARD9	OK	22.2	0.751	0.204	0.00217
DDX10	OK	23.7	-0.752	0.205	0.00221
MBD3	OK	40.6	-0.748	0.204	0.00222
VPS13C	OK	734	0.457	0.125	0.00223
ELP5	OK	25.8	-0.78	0.213	0.00223
D2HGDH	OK	27.4	0.692	0.189	0.00223
OPA1	OK	98.5	-0.368	0.1	0.00223
TULP4	OK	62.3	0.483	0.132	0.00223
RIOK1	OK	26.9	-0.754	0.206	0.00225
WDR26	OK	180	0.479	0.131	0.00226
SIPA1L2	OK	27.2	0.867	0.237	0.00226
GRAMD1A	OK	158	1.02	0.279	0.00226
NSMCE4A	OK	16.2	-0.751	0.205	0.00228
TESPA1	OK	46.4	-0.7	0.191	0.00228
IL21R	OK	73.1	-0.554	0.152	0.00228
SESN2	OK	20.1	0.934	0.256	0.00232
CYBA	OK	224	0.666	0.182	0.00232
C7orf41	OK	21.9	0.875	0.24	0.00232
GDI2	OK	212	-0.359	0.0983	0.00233
KLF13	OK	268	0.3	0.0822	0.00234
SPAG9	OK	176	0.594	0.163	0.00234
CYBB	OK	536	1.1	0.303	0.00235
TECPR2	OK	16.1	0.825	0.226	0.00238
ACACA	OK	37.1	-0.751	0.206	0.00238
LAS1L	OK	26.5	-0.728	0.2	0.00238
AGL	OK	35.6	-0.575	0.158	0.00239
KLRB1	OK	41.5	1.14	0.312	0.00239
ARRDC2	OK	75.1	0.714	0.196	0.00242
C14orf166	OK	39.3	-0.558	0.153	0.00243
RGAG4	OK	11.5	0.897	0.247	0.00243
RPS29	OK	204	-0.66	0.182	0.00244
GSPT1	OK	131	-0.548	0.151	0.00244
CHCHD2	OK	74.3	-0.522	0.144	0.00244
FCER2	OK	19.6	-1.22	0.337	0.00246
CBR1	OK	11.2	-1.02	0.282	0.00248
KIAA1432	OK	55.4	0.51	0.141	0.00248
SNX30	OK	26	1.09	0.3	0.00248
MAN1C1	OK	19.3	-0.943	0.26	0.00249
B4GALT1	OK	200	0.595	0.164	0.00249
ANKRD13D	OK	37.6	0.551	0.152	0.0025
CD5	OK	79.9	-0.664	0.183	0.00251
S100A11	OK	148	0.646	0.178	0.00255
OSBPL5	OK	18.1	1.16	0.322	0.00256
CYCS	OK	115	-0.677	0.187	0.00256
NAPSB	OK	12.1	-1.15	0.319	0.00257
SOS2	OK	65.9	0.633	0.175	0.00258
SLIRP	OK	12.5	-0.965	0.267	0.00259
RPL37A	OK	514	-0.593	0.164	0.00259
EIF4G1	OK	336	-0.485	0.134	0.00259
UBE2N	OK	70.9	-0.616	0.171	0.0026
SAE1	OK	51.2	-0.572	0.159	0.0026
VPS16	OK	35.4	0.511	0.141	0.0026
ACSL1	OK	288	0.886	0.245	0.0026
ALYREF	OK	46.7	-0.66	0.183	0.00262
LATS2	OK	29.1	0.765	0.212	0.00264
SLC5A3	OK	202	0.548	0.152	0.00264
TCP11L1	OK	17.9	0.729	0.202	0.00265
NF1	OK	97.9	0.521	0.145	0.00265
MRPS12	OK	11.8	-0.97	0.269	0.00265
ADAM17	OK	97	0.652	0.181	0.00265
C9orf72	OK	41	0.943	0.262	0.00265
INPP5F	OK	34.9	-0.842	0.234	0.00266
ZBED2	OK	77.9	-1.28	0.356	0.00266
HNRNPA0	OK	145	-0.367	0.102	0.00266
STOML2	OK	32.2	-0.851	0.236	0.00266
GFM2	OK	17.8	-0.7	0.194	0.00268
CALCOCO1	OK	56.6	0.695	0.193	0.00269
CLN3	OK	27.5	0.608	0.169	0.00269
RPS15	OK	84.3	-0.533	0.148	0.00269
SOGA1	OK	11.3	0.885	0.246	0.00269
NUP155	OK	29.3	-0.738	0.205	0.00269
MCTP2	OK	63.6	0.812	0.226	0.0027
WDR76	OK	14.1	-0.937	0.261	0.00272
ANP32E	OK	146	-0.71	0.198	0.00274
IL4I1	OK	157	0.764	0.213	0.00275
TANGO2	OK	18.7	0.711	0.198	0.00275
C9orf78	OK	71.9	-0.453	0.126	0.00275
NOB1	OK	25.2	-0.827	0.23	0.00276
MDH1	OK	45	-0.65	0.181	0.00277
RPL27	OK	403	-0.521	0.145	0.0028
KLRD1	OK	80.3	0.956	0.267	0.00281
MYBL1	OK	62.1	1.05	0.292	0.00281
TGS1	OK	42.2	-0.618	0.173	0.00282
CALR	OK	710	-0.494	0.138	0.00284
CCDC93	OK	126	0.642	0.179	0.00284
RNF146	OK	37	0.642	0.179	0.00284
RRP12	OK	29.7	-0.78	0.218	0.00285
ANXA1	OK	102	0.895	0.25	0.00285
ARHGEF7	OK	88.2	0.614	0.172	0.00286
CEP350	OK	165	0.377	0.105	0.00287
EIF3G	OK	96	-0.409	0.114	0.00287
IL10RA	OK	221	0.467	0.131	0.00288
ATP9B	OK	32.2	0.637	0.178	0.00288
URB1	OK	41.8	-0.81	0.227	0.00288
C1orf63	OK	89.2	0.658	0.184	0.00289
PNPLA8	OK	59.2	0.604	0.169	0.00289
ESYT1	OK	90.5	-0.503	0.141	0.00292
CORO1C	OK	118	0.808	0.226	0.00292
PLEKHO2	OK	143	0.883	0.248	0.00292
MRPL47	OK	17.6	-0.722	0.202	0.00292
NDUFA9	OK	38.3	-0.804	0.226	0.00294
SMC2	OK	31.2	-0.728	0.204	0.00294
DPY30	OK	18.5	-0.762	0.214	0.00295
PDLIM7	OK	27.4	0.961	0.27	0.00296
MRPL21	OK	11.4	-0.953	0.268	0.00298
EMC1	OK	48	-0.498	0.14	0.00299
EIF4B	OK	406	-0.416	0.117	0.00299
PXN	OK	83.4	0.479	0.134	0.00299
SCAMP3	OK	35.1	-0.616	0.173	0.00303
CD53	OK	364	0.427	0.12	0.00304
DIS3L	OK	23.2	-0.673	0.189	0.00304
SNRPB	OK	143	-0.585	0.165	0.00304
KIF2A	OK	81.1	-0.444	0.125	0.00304
RRS1	OK	23.6	-0.894	0.251	0.00304
LOC100132891	OK	12.9	1.14	0.32	0.00304
PHC2	OK	50	0.934	0.263	0.00308
APOA1BP	OK	17.8	-0.832	0.234	0.00309
ZNF32	OK	10.6	-0.842	0.237	0.00309
USP5	OK	62.7	-0.717	0.202	0.0031
TGOLN2	OK	321	0.334	0.0941	0.00311
ITGB2-AS1	OK	10.6	0.971	0.274	0.00312
LSM5	OK	15.6	-0.902	0.254	0.00312
TNIP1	OK	506	0.749	0.211	0.00314
VAMP3	OK	39.4	0.753	0.212	0.00315
ALG5	OK	12.5	-0.805	0.227	0.00317
PMM2	OK	32.8	-0.575	0.162	0.00317
INTS2	OK	32.9	-0.713	0.202	0.00317
PSMC5	OK	93.9	-0.541	0.153	0.00317
TOP1MT	OK	12.8	-0.825	0.233	0.00317
SNX27	OK	64.7	0.554	0.157	0.00319
TMBIM4	OK	68.5	0.54	0.153	0.00319
NAT10	OK	68.1	-0.655	0.185	0.0032
WBP1L	OK	64.2	0.711	0.201	0.00321
PDE4D	OK	142	0.662	0.187	0.00321
IRGQ	OK	82.3	0.742	0.21	0.00323
FLJ45340	OK	88.8	0.481	0.136	0.00323
PDIA6	OK	202	-0.568	0.161	0.00325
USP8	OK	69	0.478	0.135	0.00326
LARP4	OK	63.2	-0.662	0.188	0.00329
SLC38A7	OK	10.1	0.84	0.238	0.00332
BOD1L1	OK	210	0.315	0.0893	0.00332
C7orf60	OK	25.6	0.732	0.208	0.00333
WDR89	OK	22.2	-0.724	0.206	0.00334
AK2	OK	77.2	-0.479	0.136	0.00336
VGLL4	OK	23.9	0.82	0.233	0.00337
DUSP1	OK	149	0.86	0.244	0.00337
MRPL50	OK	15.3	-0.781	0.222	0.00337
ADM	OK	57	1.14	0.325	0.00342
MARK4	OK	25.1	0.635	0.181	0.00342
GEMIN4	OK	23.9	-0.763	0.217	0.00343
PARP8	OK	91.9	0.84	0.239	0.00343
ASNS	OK	24.3	-0.832	0.237	0.00343
MEF2D	OK	111	0.378	0.108	0.00345
NR1H3	OK	11.1	1.06	0.303	0.00347
H6PD	OK	68.2	0.48	0.137	0.00352
RUVBL2	OK	25.8	-0.808	0.231	0.00353
PLEKHM2	OK	121	0.504	0.144	0.00354
PLCB3	OK	25.3	0.829	0.237	0.00354
BCL2L2	OK	21.8	0.844	0.241	0.00354
AQP9	OK	261	1.14	0.325	0.00354
ANXA5	OK	459	0.761	0.217	0.00354
GAK	OK	108	0.488	0.139	0.00355
FKBP1A	OK	81.9	-0.537	0.154	0.00356
BAZ2B	OK	44.9	0.767	0.219	0.00358
THUMPD1	OK	61.9	-0.473	0.135	0.00359
WDFY1	OK	126	0.415	0.119	0.0036
OXCT1	OK	29.8	-0.564	0.161	0.0036
ZNF460	OK	50.1	0.502	0.144	0.00361
HCK	OK	169	0.902	0.258	0.00361
HTT	OK	174	-0.314	0.0898	0.00361
HIP1	OK	128	0.873	0.25	0.00361
ATP6V0B	OK	80.2	0.568	0.162	0.00362
RGS10	OK	50.5	-0.646	0.185	0.00363
NUMA1	OK	247	0.376	0.108	0.00363
C12orf29	OK	11.5	-0.814	0.233	0.00363
ATP5L	OK	69.9	-0.491	0.141	0.00364
USP39	OK	41.7	-0.53	0.152	0.00364
ACADM	OK	33.2	-0.674	0.193	0.00365
PLEKHB2	OK	179	0.603	0.173	0.00365
TRMT6	OK	26.1	-0.687	0.197	0.00365
FAM124A	OK	19.6	1.23	0.353	0.00366
NDUFB10	OK	22.9	-0.636	0.182	0.00367
MANBA	OK	48.5	0.927	0.266	0.00367
PHF1	OK	86.2	0.51	0.146	0.00368
PYCR2	OK	38.9	-0.665	0.191	0.00372
TCEB2	OK	35.9	-0.618	0.177	0.00372
CRLF2	OK	20.3	1.22	0.35	0.00373
CLK1	OK	184	0.562	0.161	0.00374
MATR3	OK	256	-0.289	0.083	0.00374
SRSF2	OK	238	-0.282	0.081	0.00375
ACAT2	OK	30.8	-0.717	0.206	0.00376
GAPT	OK	16.2	1.27	0.365	0.00377
DNAJA3	OK	34.9	-0.637	0.183	0.00381
UTP18	OK	42.2	-0.48	0.138	0.00382
GAB3	OK	30.6	0.825	0.238	0.00382
BCL9	OK	14.2	-0.777	0.224	0.00384
TXLNG	OK	32.5	-0.686	0.198	0.00384
IL18RAP	OK	76.3	1.05	0.303	0.00385
DCP2	OK	112	0.573	0.165	0.00385
PHF21A	OK	69.4	0.68	0.196	0.00386
SRP14	OK	129	-0.392	0.113	0.00386
FRY	OK	34.9	0.982	0.283	0.00387
DVL3	OK	64.5	0.475	0.137	0.00393
AARS	OK	95.2	-0.687	0.198	0.00395
ZNF259	OK	28.5	-0.687	0.199	0.00398
MRPL38	OK	21.9	-0.734	0.212	0.00398
USP34	OK	326	0.317	0.0918	0.00398
RCL1	OK	11.5	-0.861	0.249	0.00398
CRTC2	OK	76.2	0.54	0.156	0.004
SIK2	OK	20	0.6	0.174	0.00406
RAP2B	OK	58.5	0.605	0.175	0.00406
TIMMDC1	OK	21.3	-0.631	0.183	0.00409
CCDC64	OK	75	-0.934	0.271	0.00413
NUCKS1	OK	200	-0.439	0.127	0.00414
RENBP	OK	28.8	0.791	0.23	0.00414
DNMBP	OK	13.3	1.04	0.303	0.00416
ABR	OK	132	0.692	0.201	0.00416
NDUFA4	OK	52	-0.722	0.21	0.00416
EYA3	OK	57	0.515	0.15	0.00418
ERAL1	OK	16.1	-0.761	0.221	0.00418
MIDN	OK	110	0.456	0.132	0.00418
MCOLN1	OK	23.3	0.754	0.219	0.00418
TYW3	OK	22	-0.694	0.202	0.0042
ELMOD3	OK	12.1	0.838	0.244	0.0042
FGD3	OK	75.6	0.454	0.132	0.0042
PRPF38A	OK	59.8	-0.44	0.128	0.00421
TSHZ2	OK	48.5	-1.15	0.335	0.00421
JUN	OK	77.4	0.731	0.213	0.00423
KHSRP	OK	119	-0.498	0.145	0.00424
RIT1	OK	83.2	0.529	0.154	0.00425
PPP5C	OK	28.2	-0.767	0.223	0.00428
ZNF37A	OK	48.8	-0.511	0.149	0.00431
NGDN	OK	24.4	-0.577	0.168	0.00432
TPP1	OK	138	0.53	0.155	0.00433
SLC41A2	OK	52.4	0.938	0.274	0.00433
CARD16	OK	27.2	0.737	0.215	0.00434
SEMA4A	OK	73.7	0.807	0.236	0.00437
CENPN	OK	11	-0.892	0.26	0.00438
ZNF160	OK	32.9	0.636	0.186	0.00438
CD3G	OK	30.8	-0.868	0.253	0.00439
TRIM25	OK	161	0.582	0.17	0.00439
CD44	OK	1550	0.75	0.219	0.00443
BRWD3	OK	110	0.555	0.162	0.00446
CALCOCO2	OK	96.5	0.347	0.102	0.00452
ZNF646	OK	35.8	0.568	0.166	0.00457
WIPF1	OK	358	0.436	0.128	0.00457
ATP6V1E1	OK	68.6	0.382	0.112	0.00457
WDR5	OK	36.6	-0.603	0.177	0.00458
ZSWIM4	OK	35.8	0.9	0.264	0.00461
SQSTM1	OK	298	0.605	0.177	0.00462
ABCF2	OK	48.8	-0.594	0.174	0.00462
DHCR24	OK	32.9	-0.996	0.292	0.00464
BCL9L	OK	104	0.627	0.184	0.00464
PSMC6	OK	41.7	-0.542	0.159	0.00467
CRIM1	OK	79.7	0.848	0.249	0.00467
SH3BP2	OK	155	0.553	0.163	0.00468
NDUFS5	OK	41.8	-0.681	0.2	0.00469
PTPRE	OK	226	0.674	0.198	0.00469
CCDC85B	OK	13.7	-1.03	0.302	0.00469
LRP5L	OK	17.7	0.835	0.246	0.0047
RNF13	OK	83	0.825	0.243	0.00471
THOC6	OK	18.2	-0.906	0.266	0.00474
PLEKHM3	OK	71.1	0.724	0.213	0.00475
GEMIN5	OK	22.1	-0.77	0.227	0.00475
UBE2V2	OK	24.2	-0.568	0.167	0.00475
HLA-E	OK	1480	0.361	0.106	0.00477
MAML2	OK	53.7	0.712	0.21	0.00478
OSCAR	OK	21.5	1.11	0.328	0.00479
VPS8	OK	32	0.653	0.193	0.00481
SLC25A22	OK	21.7	-0.824	0.243	0.00482
PRR3	OK	10.5	-0.975	0.287	0.00482
CD8B	OK	12.6	-1.03	0.305	0.00483
LAPTM5	OK	652	0.692	0.204	0.00488
NBPF10	OK	25.9	0.792	0.234	0.00488
ME2	OK	68.4	-0.383	0.113	0.00488
HDAC4	OK	51.5	0.587	0.173	0.00488
BRI3	OK	43.6	0.847	0.25	0.00488
TMEM126B	OK	26.8	-0.584	0.173	0.0049
SNRPG	OK	35.9	-0.72	0.213	0.00493
VBP1	OK	38.2	-0.601	0.178	0.00496
BMP2K	OK	32	0.61	0.181	0.00501
CDK19	OK	30.3	0.73	0.216	0.00501
PUF60	OK	65.5	-0.532	0.158	0.00501
NDUFB6	OK	13.2	-0.839	0.248	0.00502
URI1	OK	42.2	-0.482	0.143	0.00503
RIN3	OK	71.5	0.746	0.221	0.00509
TRIOBP	OK	34	0.583	0.173	0.00509
AMICA1	OK	72.9	-0.833	0.247	0.0051
ZNF318	OK	80.9	0.724	0.215	0.0051
CASP1	OK	97.9	0.721	0.214	0.00511
HGS	OK	77.3	0.529	0.157	0.00511
SAMM50	OK	23.1	-0.621	0.184	0.00511
CAMK2D	OK	51.7	-0.64	0.19	0.00511
TMUB2	OK	35.2	0.519	0.154	0.00513
MGLL	OK	90	0.751	0.223	0.00513
YPEL3	OK	52	0.853	0.253	0.00514
HMOX1	OK	31.2	0.842	0.25	0.00514
SAMD1	OK	21.2	-0.718	0.213	0.00517
PRKAR2A	OK	30.1	0.508	0.151	0.00517
LRRC58	OK	64	-0.435	0.129	0.00517
CLIP2	OK	21.2	0.647	0.192	0.00517
RPAP3	OK	30	-0.586	0.174	0.00519
POLR2F	OK	18.6	-0.796	0.237	0.00519
FIS1	OK	25.3	-0.562	0.167	0.00519
KIF13B	OK	63.3	0.432	0.129	0.00519
TNRC18	OK	138	0.556	0.166	0.00524
GDAP2	OK	34.3	0.551	0.164	0.00526
IARS2	OK	60.2	-0.487	0.145	0.00526
ARHGEF40	OK	18.1	1.2	0.358	0.00526
XPO1	OK	179	-0.394	0.117	0.00526
ERMP1	OK	28.1	0.792	0.236	0.00526
EXOSC2	OK	28.6	-0.697	0.207	0.00526
PSMD6	OK	60.3	-0.49	0.146	0.00527
PDCD6IP	OK	136	0.433	0.129	0.00528
PRDX1	OK	244	-0.531	0.158	0.00529
SYTL2	OK	54.1	0.94	0.28	0.00529
CLK4	OK	39	0.503	0.15	0.00529
DLG5	OK	12.7	1.09	0.325	0.0053
CLEC5A	OK	309	0.92	0.274	0.0053
PTAFR	OK	198	0.812	0.242	0.00532
COA4	OK	15.6	-0.688	0.205	0.00536
PTGER2	OK	25.6	0.87	0.26	0.00536
GUSBP11	OK	34.4	0.562	0.168	0.00536
RPS14	OK	1010	-0.594	0.177	0.00536
NISCH	OK	109	0.527	0.157	0.0054
MRPL22	OK	16.3	-0.755	0.226	0.0054
PFDN2	OK	37.6	-0.642	0.192	0.00544
PRKCD	OK	108	0.644	0.193	0.00544
CELF1	OK	244	0.304	0.0908	0.00545
SHISA5	OK	70.7	0.51	0.152	0.00545
FBXL5	OK	69.6	0.477	0.143	0.00545
SRFBP1	OK	13.2	-0.784	0.234	0.00545
FAM46A	OK	27.1	0.798	0.239	0.00546
CSF2RA	OK	127	0.796	0.238	0.00546
PRIM1	OK	11.5	-0.762	0.228	0.00547
PPP2R3C	OK	26.5	0.548	0.164	0.00549
ATP5I	OK	20.6	-0.738	0.221	0.00549
TMEM48	OK	20.5	-0.718	0.215	0.00552
VARS2	OK	23.8	-0.715	0.214	0.00552
MRPL45	OK	17.5	-0.8	0.24	0.00554
PDE4DIP	OK	318	0.839	0.252	0.00555
CHD9	OK	61.4	0.504	0.151	0.00557
NARS	OK	96.2	-0.416	0.125	0.00559
MAP4K1	OK	49.1	-0.546	0.164	0.00559
OSBPL2	OK	37.5	0.467	0.14	0.00561
TSC22D2	OK	40.1	0.525	0.158	0.00561
NDUFV2	OK	63.5	-0.532	0.16	0.00562
FTL	OK	1500	0.58	0.174	0.00564
MIR17HG	OK	21.4	-0.825	0.248	0.00567
SDF2L1	OK	25.9	-0.796	0.239	0.00567
TMEM173	OK	33.8	-0.852	0.256	0.00567
INSIG1	OK	110	0.673	0.202	0.00567
GRHPR	OK	21.9	-0.711	0.214	0.00567
PSME1	OK	234	-0.435	0.131	0.00569
HECTD1	OK	160	0.3	0.0901	0.00569
IL10RB	OK	54.6	0.554	0.166	0.00569
CREB3L2	OK	49.3	0.498	0.15	0.00569
FCAR	OK	73.9	1.09	0.327	0.0057
CD3D	OK	58.3	-0.871	0.262	0.00575
LIMS1	OK	166	0.795	0.239	0.00576
EIF3K	OK	59	-0.47	0.141	0.00577
FBXO45	OK	18.4	-0.682	0.205	0.00578
ITM2C	OK	27.1	-0.669	0.202	0.00579
INPP5D	OK	153	0.573	0.173	0.00579
RAF1	OK	90.2	0.374	0.113	0.00579
RHBDD2	OK	64.6	0.755	0.228	0.00579
AFF4	OK	145	0.408	0.123	0.00583
LSM2	OK	15.8	-0.798	0.24	0.00583
KCTD7	OK	38.8	0.588	0.177	0.00584
RUFY2	OK	16.8	0.66	0.199	0.00585
SCARNA17	OK	69.5	0.639	0.193	0.00588
TMEM70	OK	20	-0.61	0.184	0.00588
ITGAX	OK	403	0.773	0.234	0.00593
SPATA5	OK	13	-0.784	0.237	0.00596
PSMB4	OK	126	-0.436	0.132	0.006
C12orf10	OK	11.2	-0.801	0.242	0.006
BAZ2A	OK	286	0.294	0.089	0.006
UAP1L1	OK	28.8	0.874	0.264	0.00601
ZNF516	OK	47.1	0.782	0.237	0.00608
ACP1	OK	44.2	-0.471	0.143	0.0061
KLHL24	OK	81.6	0.824	0.25	0.0061
RRM1	OK	29.1	-0.64	0.194	0.00611
IGSF6	OK	46.3	0.868	0.263	0.00613
USP14	OK	61.8	-0.55	0.167	0.00615
CHCHD3	OK	23.7	-0.651	0.198	0.00616
DYNLL2	OK	67.8	-0.457	0.138	0.00618
LPGAT1	OK	90.5	0.457	0.139	0.00626
SNHG16	OK	58.4	-0.717	0.218	0.00626
RRBP1	OK	53.7	0.532	0.162	0.00626
DHX30	OK	53.6	-0.554	0.168	0.00626
KLF2	OK	22.9	1.09	0.331	0.00629
SIPA1L1	OK	150	0.551	0.167	0.00631
FARSA	OK	52.9	-0.612	0.186	0.00631
HIPK3	OK	110	0.52	0.158	0.00632
SOD2	OK	2330	0.921	0.28	0.00632
CXCR3	OK	31.1	-1.01	0.308	0.00634
TRMT10C	OK	21.7	-0.689	0.21	0.00635
FAM120B	OK	31.1	0.525	0.16	0.00635
HIGD1A	OK	39.7	-0.556	0.169	0.00636
HMBOX1	OK	41.8	0.441	0.134	0.00637
TMA7	OK	41.1	-0.668	0.203	0.0064
UBAP1	OK	57.2	0.611	0.186	0.00643
EPB41L3	OK	228	1.12	0.342	0.0065
CHCHD7	OK	25.2	-0.64	0.195	0.00651
STX2	OK	18.2	0.66	0.201	0.00652
MCM7	OK	101	-0.574	0.175	0.00652
HOOK1	OK	11.5	-0.855	0.261	0.00655
ZC3H12D	OK	123	-0.847	0.259	0.00655
TMEM51	OK	26	1.06	0.324	0.00658
RFC3	OK	11.4	-0.855	0.261	0.00658
ADAMTS10	OK	10.2	0.889	0.271	0.00658
CHORDC1	OK	38.9	-0.574	0.175	0.0066
IFFO1	OK	37.6	0.672	0.206	0.00664
MMP19	OK	108	1.1	0.336	0.00665
TIMM13	OK	23.1	-0.839	0.257	0.00672
TTC31	OK	36.1	0.504	0.154	0.00672
SSFA2	OK	64.2	0.532	0.163	0.00672
LOC100129550	OK	10.5	1.1	0.337	0.00672
ESD	OK	30.4	-0.617	0.189	0.00675
GIGYF1	OK	164	0.35	0.107	0.00675
LOC493754	OK	15.4	0.705	0.216	0.00676
TXN2	OK	19.8	-0.599	0.184	0.00677
RAB5A	OK	53.1	0.572	0.175	0.00677
SEC24B	OK	49.7	0.389	0.119	0.00677
ARSD	OK	13.6	0.979	0.3	0.00678
ULK1	OK	35	0.702	0.215	0.0068
ULK3	OK	25.5	-0.663	0.203	0.0068
PSMA7	OK	131	-0.473	0.145	0.0068
TMEM41B	OK	34.9	0.57	0.175	0.00681
KRI1	OK	51.5	-0.517	0.159	0.00681
APMAP	OK	85.7	0.508	0.156	0.00681
PSTPIP2	OK	88.1	0.898	0.276	0.00685
RPS3A	OK	127	-0.557	0.171	0.00687
ALOX5AP	OK	37.1	0.777	0.239	0.0069
HIRIP3	OK	15	-0.828	0.254	0.0069
TAF4B	OK	15.2	-0.814	0.25	0.00695
ACLY	OK	126	-0.42	0.129	0.00696
TRAPPC4	OK	28.6	-0.677	0.208	0.00699
EPM2AIP1	OK	76	0.476	0.147	0.00699
OSBPL7	OK	23.8	0.775	0.239	0.00702
NARF	OK	37	0.546	0.168	0.00702
NR2C2	OK	109	0.437	0.135	0.00705
URB2	OK	21.1	-0.858	0.264	0.00709
NAA20	OK	25.5	-0.804	0.248	0.00716
ACSL5	OK	163	0.675	0.208	0.00717
EPHA4	OK	12.5	0.929	0.287	0.0072
NAA25	OK	51.9	-0.564	0.174	0.00721
IMMT	OK	62	-0.5	0.154	0.00721
ARMC6	OK	14.5	-0.763	0.236	0.00724
SLFN13	OK	70.3	0.682	0.211	0.00725
TMEM167B	OK	69.2	0.443	0.137	0.0073
EIF3F	OK	67.4	-0.379	0.117	0.00732
CS	OK	94.7	-0.358	0.111	0.00732
PIM2	OK	159	-0.549	0.17	0.00734
GATAD1	OK	28	0.551	0.171	0.00735
LLPH	OK	27.5	-0.53	0.164	0.00738
BTN3A2	OK	169	0.456	0.141	0.00741
RC3H1	OK	93.1	0.378	0.117	0.00742
ZNF81	OK	23.5	0.636	0.197	0.00742
EIF6	OK	45.4	-0.604	0.187	0.00743
COPS5	OK	32.9	-0.483	0.15	0.00746
RIOK2	OK	25.5	-0.711	0.22	0.00747
EBP	OK	16.3	-0.821	0.254	0.00747
PTBP3	OK	202	0.375	0.116	0.0075
MRPS9	OK	17.7	-0.759	0.235	0.00751
CDC123	OK	46.8	-0.485	0.15	0.00752
SSBP3	OK	27.5	0.515	0.16	0.00753
IFT172	OK	10.1	0.811	0.252	0.00753
ATG9A	OK	34.6	0.554	0.172	0.00757
GTPBP2	OK	55.5	0.493	0.153	0.00757
GFM1	OK	42.8	-0.482	0.15	0.0076
TMF1	OK	91.3	0.439	0.136	0.00764
PTPLAD1	OK	18.4	-0.687	0.214	0.00765
CLIC4	OK	94.3	0.651	0.202	0.00766
CALM2	OK	220	-0.376	0.117	0.00769
CD58	OK	32.5	0.594	0.185	0.0077
LOC388692	OK	34.1	0.798	0.248	0.00771
IPMK	OK	38.8	0.848	0.264	0.00773
AP1G1	OK	135	0.304	0.0947	0.00773
KMO	OK	30.1	0.805	0.251	0.00775
MALAT1	OK	24200	0.358	0.111	0.00777
RPS19	OK	525	-0.404	0.126	0.00778
EIF4A2	OK	287	-0.339	0.106	0.00779
SEC24A	OK	76.5	0.772	0.241	0.00788
MRPS15	OK	17.1	-0.848	0.264	0.00789
INPPL1	OK	75.2	0.456	0.142	0.00795
NIPBL	OK	206	0.341	0.107	0.00795
PDHA1	OK	43.9	-0.465	0.145	0.00799
NR1D2	OK	59.3	0.657	0.205	0.00802
FRYL	OK	137	0.304	0.0949	0.00802
BTBD9	OK	35	0.506	0.158	0.00802
GTF3C6	OK	30.6	-0.779	0.243	0.00802
GLTSCR1	OK	25.8	0.532	0.166	0.00806
CAND1	OK	120	-0.355	0.111	0.00807
MRPS2	OK	11.4	-0.9	0.282	0.0081
TPD52L2	OK	89.5	0.483	0.151	0.00811
RBX1	OK	39.9	-0.539	0.169	0.00815
TIMM17A	OK	37.7	-0.578	0.181	0.00817
FAM98B	OK	15.6	-0.714	0.224	0.00818
PGM2	OK	18.5	-0.721	0.226	0.00824
ANKRD44	OK	165	0.299	0.0938	0.00829
IFFO2	OK	40.3	-0.559	0.175	0.00833
LOC283663	OK	53.4	0.868	0.272	0.00835
IQSEC1	OK	140	0.412	0.129	0.00835
KIAA0922	OK	57.4	-0.436	0.137	0.00835
WDTC1	OK	65.7	0.481	0.151	0.00836
PPP3CA	OK	48.3	0.592	0.186	0.00836
HLA-F	OK	348	0.493	0.155	0.00847
DENR	OK	59.7	-0.405	0.127	0.00848
FKBP15	OK	60.1	0.511	0.161	0.00848
DHX37	OK	33.7	-0.66	0.208	0.00853
TFDP2	OK	26.7	0.739	0.233	0.00854
C7orf50	OK	18.7	-0.752	0.237	0.0086
ZXDC	OK	99.6	0.436	0.137	0.00862
HBP1	OK	76.2	0.48	0.151	0.00862
FBXL20	OK	49	0.685	0.216	0.00863
PSMB8	OK	115	-0.424	0.134	0.00863
CFP	OK	22.8	1.07	0.337	0.00865
FEN1	OK	20	-0.844	0.266	0.00869
COX6A1	OK	35	-0.474	0.15	0.00869
SLC25A40	OK	21.1	0.711	0.224	0.00869
ATP6V0E2	OK	12.7	-0.792	0.25	0.00871
KANSL3	OK	74.2	0.397	0.125	0.00872
DDX5	OK	766	-0.178	0.0561	0.00876
GOLGB1	OK	183	0.316	0.0998	0.00876
MEGF9	OK	42.6	0.823	0.26	0.00877
C9orf16	OK	12.1	-0.79	0.249	0.00877
POLE3	OK	42.8	-0.518	0.164	0.00882
MPHOSPH10	OK	33.5	-0.546	0.173	0.00883
PXK	OK	21.8	0.709	0.224	0.00888
CLN6	OK	24.4	-0.629	0.199	0.0089
SNX29	OK	38.7	0.658	0.208	0.0089
RPS10	OK	16.7	-0.684	0.216	0.0089
MYB	OK	23.8	-1.03	0.325	0.00891
COPS6	OK	45.8	-0.511	0.162	0.00893
ZNRF2	OK	101	0.699	0.221	0.00894
FBXO42	OK	25.1	0.574	0.182	0.00896
LCP1	OK	1420	0.316	0.1	0.009
ETV3	OK	55.5	0.697	0.221	0.00902
ATPAF1	OK	13.6	-0.723	0.229	0.00906
HPS1	OK	52	0.453	0.144	0.00906
CD28	OK	129	-0.975	0.309	0.00906
ZC3H12C	OK	44.5	0.911	0.289	0.00911
ASXL2	OK	96.2	0.329	0.104	0.00914
KIAA0391	OK	22.3	-0.605	0.192	0.00917
SRRT	OK	134	-0.443	0.141	0.00919
MAPK1	OK	172	0.445	0.141	0.00925
LOC100129034	OK	47.9	0.732	0.233	0.00925
SNRNP40	OK	29.7	-0.595	0.189	0.00929
NDUFB8	OK	55.4	-0.493	0.157	0.0093
CRAMP1L	OK	56.2	0.471	0.15	0.0093
PGPEP1	OK	38.1	0.586	0.186	0.0093
MAT2A	OK	135	-0.456	0.145	0.0093
ZBP1	OK	15	1.16	0.37	0.0093
PER1	OK	67.2	0.802	0.255	0.00934
FNDC3A	OK	90.9	0.47	0.15	0.00935
AIMP2	OK	13.6	-0.704	0.224	0.00943
ACSS1	OK	31.6	0.65	0.207	0.00945
DNAJC21	OK	52.9	-0.43	0.137	0.00945
HDAC6	OK	55.6	0.491	0.156	0.00945
MTPAP	OK	27.2	-0.542	0.173	0.0095
MXD1	OK	260	0.837	0.267	0.00959
NDUFA8	OK	16.3	-0.621	0.198	0.00967
UTP11L	OK	21.7	-0.662	0.211	0.00968
FDPS	OK	73.5	-0.527	0.168	0.00968
MTA2	OK	103	-0.348	0.111	0.00971
LETM1	OK	57.6	-0.48	0.153	0.00971
RBM19	OK	59.1	-0.523	0.167	0.00975
RELT	OK	58.8	0.542	0.173	0.00976
SDAD1	OK	33.7	-0.5	0.16	0.00976
CDK14	OK	20.1	0.926	0.296	0.00976
LOC646719	OK	18.5	0.686	0.219	0.00977
ERP44	OK	65.7	0.478	0.153	0.0098
HELZ	OK	136	0.439	0.14	0.00982
CYB5R4	OK	44.1	0.533	0.171	0.00984
OXR1	OK	20.1	0.586	0.188	0.00984
FAM214B	OK	26.6	0.775	0.248	0.00984
SLC15A4	OK	49.1	0.511	0.164	0.00985
THEMIS2	OK	114	0.808	0.259	0.00987
ITGB7	OK	70.6	-0.77	0.247	0.00988
DHX33	OK	34.6	-0.609	0.195	0.00988
VRK2	OK	52	0.483	0.155	0.00988
SNF8	OK	27	-0.573	0.184	0.00989
EPT1	OK	59.1	-0.511	0.164	0.00992
POR	OK	58.1	0.734	0.235	0.00992
MACF1	OK	592	0.368	0.118	0.00993
PATL1	OK	101	0.334	0.107	0.00993
FKBP3	OK	27.3	-0.545	0.175	0.00995
ZFYVE16	OK	125	0.686	0.22	0.00998
IFRD1	OK	43.4	0.546	0.175	0.01
PLEKHM1	OK	42	0.486	0.156	0.0101
ACTG1	OK	1310	-0.362	0.116	0.0101
C1orf216	OK	19.8	-0.778	0.25	0.0102
TRIM33	OK	115	0.392	0.126	0.0102
IGSF8	OK	26.5	-0.562	0.181	0.0102
STMN1	OK	20.7	-0.74	0.239	0.0103
GNPTG	OK	33.6	0.625	0.201	0.0103
AKAP10	OK	35.6	0.525	0.169	0.0103
TRIP12	OK	289	0.216	0.0696	0.0103
CYC1	OK	42.3	-0.571	0.184	0.0103
SNAPC4	OK	23.4	-0.634	0.204	0.0103
CRYZ	OK	15.4	-0.899	0.29	0.0104
PARP4	OK	93.3	0.602	0.194	0.0104
ABCA7	OK	59	0.665	0.215	0.0104
LOC100505812	OK	11.1	0.716	0.231	0.0104
C19orf48	OK	13	-0.807	0.26	0.0104
PIKFYVE	OK	127	0.398	0.128	0.0104
TSPAN17	OK	39.6	-0.594	0.192	0.0104
MYLIP	OK	28.6	0.753	0.243	0.0104
SLC36A4	OK	30.1	0.67	0.216	0.0105
ERC1	OK	73.6	0.49	0.158	0.0105
KLHL28	OK	46.1	0.619	0.2	0.0105
PSMA4	OK	128	-0.469	0.151	0.0105
ZFAND6	OK	49	0.509	0.165	0.0105
MAPK7	OK	14.4	0.704	0.227	0.0105
HMGXB3	OK	55.8	0.363	0.117	0.0105
TSEN15	OK	18.4	-0.662	0.214	0.0106
MICU1	OK	45.7	0.553	0.179	0.0106
RTN3	OK	64	0.52	0.168	0.0106
ZCRB1	OK	16.2	-0.661	0.214	0.0106
RPL38	OK	256	-0.446	0.144	0.0106
ECSIT	OK	16	-0.703	0.227	0.0106
HSPBP1	OK	16	-0.79	0.255	0.0106
SH3BP5	OK	198	0.63	0.204	0.0106
CPEB2	OK	31.4	0.664	0.215	0.0106
DDB1	OK	147	-0.404	0.131	0.0107
MTX2	OK	10.1	-0.819	0.265	0.0107
SLC4A2	OK	85.5	0.632	0.205	0.0107
DNAJC11	OK	40.2	-0.529	0.171	0.0108
MRPL23	OK	15.5	-0.737	0.239	0.0108
WDR82	OK	189	-0.241	0.078	0.0108
TRAT1	OK	28.7	-0.736	0.238	0.0108
SNX18	OK	32.2	0.546	0.177	0.0108
DGKH	OK	22.6	0.622	0.202	0.0109
FCER1G	OK	283	0.739	0.24	0.011
NCLN	OK	49.8	-0.428	0.139	0.011
TBC1D23	OK	43.5	0.547	0.178	0.011
VAC14	OK	61.7	0.704	0.229	0.0111
TAOK1	OK	190	0.404	0.131	0.0111
MBTD1	OK	32	0.569	0.185	0.0111
CHMP1B	OK	61.5	0.469	0.152	0.0111
SLC35E1	OK	60.5	0.58	0.189	0.0111
DSE	OK	139	0.861	0.28	0.0111
RAB39A	OK	10.9	0.844	0.275	0.0112
ZC3H15	OK	75.2	-0.404	0.132	0.0112
ARFGAP3	OK	119	0.717	0.233	0.0112
IGF2R	OK	481	0.513	0.167	0.0112
MCL1	OK	873	0.311	0.101	0.0113
LTBR	OK	15.7	0.887	0.289	0.0113
ESF1	OK	38.7	-0.535	0.174	0.0113
DIMT1	OK	17.5	-0.701	0.229	0.0113
IVD	OK	27.9	-0.601	0.196	0.0114
WWP2	OK	70.9	0.377	0.123	0.0114
CWC27	OK	28.3	-0.608	0.199	0.0114
LRP12	OK	30.9	0.925	0.302	0.0114
LIMD1	OK	48.6	0.504	0.165	0.0115
BROX	OK	22.8	0.521	0.17	0.0116
CD3E	OK	117	-0.738	0.241	0.0116
TNFRSF1A	OK	49.5	0.61	0.199	0.0116
ARHGAP9	OK	116	0.687	0.225	0.0116
NKIRAS2	OK	30.1	0.464	0.152	0.0116
CITED2	OK	30.8	0.698	0.228	0.0116
ATAD3B	OK	19.3	-0.768	0.251	0.0117
CD63	OK	482	0.656	0.215	0.0117
AFG3L2	OK	42.5	-0.47	0.154	0.0117
DDX18	OK	123	-0.351	0.115	0.0117
HSD17B11	OK	41.8	0.749	0.245	0.0117
ST8SIA4	OK	86.5	0.631	0.207	0.0117
FAN1	OK	22.9	-0.768	0.252	0.0118
RAB31	OK	147	0.768	0.252	0.0118
CEP135	OK	67.8	0.65	0.213	0.0118
USP3	OK	98	0.556	0.183	0.012
SFPQ	OK	349	-0.342	0.112	0.0121
AZI2	OK	36.7	0.695	0.229	0.0121
IDS	OK	246	0.452	0.149	0.0121
ALDH2	OK	19.6	0.842	0.277	0.0122
DVL2	OK	27.6	-0.569	0.187	0.0122
CD96	OK	134	0.446	0.147	0.0122
PLSCR1	OK	87	0.797	0.262	0.0122
SLCO3A1	OK	41.6	0.753	0.248	0.0123
EXOSC7	OK	18.9	-0.724	0.239	0.0123
F2R	OK	38	0.826	0.272	0.0123
CPSF4	OK	20.4	-0.555	0.183	0.0123
DDX31	OK	13.8	-0.643	0.212	0.0123
SRP9	OK	46.8	-0.428	0.141	0.0124
ZNF589	OK	22.6	-0.754	0.249	0.0124
KIF1B	OK	110	0.603	0.199	0.0125
CDK2	OK	25.6	-0.611	0.202	0.0125
ZBTB1	OK	116	0.525	0.173	0.0125
MAP3K14	OK	71.6	-0.456	0.15	0.0125
DAXX	OK	66.7	-0.368	0.121	0.0125
PRRC2B	OK	245	0.358	0.118	0.0125
UBR4	OK	538	0.34	0.112	0.0126
C10orf76	OK	42	0.465	0.153	0.0126
TBC1D22A	OK	44.2	0.478	0.158	0.0126
SZT2	OK	92.7	0.298	0.0984	0.0127
BANP	OK	22.6	0.677	0.224	0.0127
PSMC3	OK	96.8	-0.601	0.199	0.0128
ADCY9	OK	19.7	0.752	0.249	0.0128
NDUFAB1	OK	21.3	-0.719	0.238	0.0128
EBI3	OK	66.5	0.916	0.303	0.0128
ICOSLG	OK	29.6	0.713	0.236	0.0128
POLR2C	OK	35.9	-0.476	0.158	0.0129
SETD2	OK	157	0.276	0.0914	0.0129
NEK6	OK	38.6	0.671	0.223	0.0129
RAP2C	OK	133	0.514	0.17	0.0129
RNF166	OK	42.6	0.75	0.249	0.013
RAB5C	OK	101	0.384	0.127	0.013
ST6GAL1	OK	107	-0.515	0.171	0.013
PHF14	OK	40.7	-0.512	0.17	0.013
CCSAP	OK	19.6	0.792	0.263	0.0131
ZFYVE26	OK	53.5	0.439	0.146	0.0131
NFAT5	OK	239	0.348	0.116	0.0131
HM13	OK	92.9	0.497	0.165	0.0131
DIDO1	OK	120	0.307	0.102	0.0131
ANTXR2	OK	156	0.651	0.216	0.0131
TRMT11	OK	10.4	-0.771	0.256	0.0131
YY1AP1	OK	58.7	0.39	0.13	0.0132
IVNS1ABP	OK	404	0.748	0.249	0.0132
ATXN10	OK	28.7	-0.574	0.191	0.0132
ZDHHC3	OK	47.3	0.446	0.148	0.0132
ELMO1	OK	42.1	-0.63	0.209	0.0132
TMEM140	OK	45.5	0.762	0.254	0.0132
ATP6V1C1	OK	73.4	0.482	0.16	0.0132
GABARAP	OK	153	0.413	0.137	0.0133
APBB3	OK	20.9	1.01	0.337	0.0133
AGPAT2	OK	10.4	0.688	0.229	0.0133
GPD2	OK	48.1	0.704	0.235	0.0134
MED15	OK	106	0.4	0.133	0.0134
DNAJB12	OK	57.9	0.541	0.181	0.0135
YIF1A	OK	20.5	-0.658	0.219	0.0135
GMIP	OK	122	0.432	0.144	0.0135
CYFIP2	OK	178	-0.382	0.127	0.0135
TSFM	OK	15.4	-0.674	0.225	0.0136
PCNXL4	OK	51.8	0.515	0.172	0.0137
PTBP1	OK	235	-0.386	0.129	0.0137
COPS8	OK	19.8	-0.599	0.2	0.0137
LCORL	OK	19.4	0.682	0.228	0.0137
MRPS33	OK	12.4	-0.707	0.236	0.0137
PAX5	OK	29.8	-0.832	0.278	0.0137
PRDX3	OK	42.7	-0.485	0.162	0.0138
PSMB3	OK	68.5	-0.486	0.163	0.0138
RNF149	OK	95.5	0.553	0.185	0.0138
CHD4	OK	294	-0.295	0.0987	0.0139
NCOR2	OK	187	0.41	0.137	0.014
YWHAQ	OK	146	-0.524	0.176	0.014
TNFRSF10B	OK	43.7	0.458	0.153	0.014
STX7	OK	64.6	0.647	0.217	0.0141
GYG1	OK	22	0.56	0.188	0.0142
DDX59	OK	23.7	0.547	0.184	0.0144
REXO2	OK	14.3	-0.694	0.233	0.0144
MARS	OK	141	-0.331	0.111	0.0144
MN1	OK	16.8	0.98	0.33	0.0144
SYTL3	OK	83.1	0.709	0.238	0.0144
TMEM109	OK	50.6	-0.449	0.151	0.0145
LIMA1	OK	19.7	-0.938	0.315	0.0145
AXIN1	OK	45.8	0.474	0.159	0.0145
MTMR4	OK	89.7	-0.305	0.103	0.0145
AATK	OK	17.2	1.03	0.347	0.0145
TTC38	OK	23.2	0.679	0.229	0.0145
AZIN1	OK	214	0.426	0.143	0.0147
NONO	OK	216	-0.293	0.0989	0.0147
USP1	OK	59.4	-0.361	0.122	0.0148
CALM3	OK	184	-0.376	0.127	0.0148
AGO2	OK	88.8	0.354	0.12	0.0148
FBXW5	OK	87.8	0.457	0.154	0.0148
MARK2	OK	68.7	0.418	0.141	0.0149
SLC35A4	OK	56.7	-0.436	0.147	0.0149
ZNF217	OK	138	0.438	0.148	0.015
U2AF1	OK	111	-0.401	0.135	0.015
MAL	OK	10.3	-0.82	0.277	0.0151
TADA3	OK	38	0.401	0.136	0.0151
HINT1	OK	84.5	-0.475	0.16	0.0151
SF1	OK	263	-0.255	0.0862	0.0152
HDAC5	OK	32.1	0.689	0.233	0.0152
CREBRF	OK	98.6	0.616	0.209	0.0153
IKZF1	OK	284	-0.361	0.122	0.0154
RBM34	OK	42	-0.464	0.157	0.0155
CASP4	OK	132	0.517	0.176	0.0155
QTRT1	OK	17.6	-0.712	0.242	0.0155
SIRT2	OK	29.1	0.524	0.178	0.0155
PRPF4	OK	34.3	-0.456	0.155	0.0155
AKT3	OK	73.5	0.479	0.163	0.0156
NCR3LG1	OK	30.1	0.746	0.254	0.0156
RIOK3	OK	89.5	0.449	0.153	0.0156
RIN2	OK	108	0.933	0.317	0.0156
PYGB	OK	48.5	0.371	0.126	0.0156
TOP1	OK	139	-0.33	0.112	0.0156
SIDT1	OK	27.9	0.515	0.175	0.0156
PHAX	OK	35.3	-0.507	0.172	0.0156
GLTSCR1L	OK	47.1	0.531	0.18	0.0156
PM20D2	OK	16.6	-0.635	0.216	0.0156
IFNGR1	OK	77.2	0.812	0.276	0.0156
GOLGA2	OK	70	0.385	0.131	0.0156
ETS2	OK	192	0.7	0.238	0.0157
MTMR1	OK	32.4	-0.53	0.18	0.0157
API5	OK	123	-0.331	0.113	0.0158
EMG1	OK	28.5	-0.56	0.191	0.0158
NAGK	OK	69.9	0.555	0.189	0.0158
DNAJA1	OK	235	-0.558	0.19	0.0158
CROCCP2	OK	28.4	0.61	0.208	0.0159
MZF1	OK	15.4	0.725	0.247	0.0159
ZNF445	OK	54	0.469	0.16	0.0159
CSNK1D	OK	170	0.297	0.101	0.016
MRPL1	OK	16.5	-0.615	0.21	0.0161
DOCK7	OK	14.3	0.844	0.288	0.0162
CLEC7A	OK	44	0.942	0.322	0.0162
CARD8	OK	94.1	0.464	0.158	0.0162
GIGYF2	OK	87.2	0.331	0.113	0.0162
ATP5O	OK	48.1	-0.433	0.148	0.0162
MRPL41	OK	17.8	-0.725	0.247	0.0162
EDEM3	OK	59	0.465	0.159	0.0163
TARBP2	OK	10.1	-0.765	0.262	0.0163
VWA9	OK	25	-0.549	0.188	0.0163
TUBG1	OK	10.3	-0.811	0.277	0.0163
PPP1R12C	OK	78.5	0.361	0.123	0.0163
TXK	OK	24.7	0.736	0.252	0.0163
RGS2	OK	23.2	0.884	0.302	0.0164
PRDX5	OK	54.5	-0.552	0.189	0.0164
SLC4A8	OK	11.3	0.81	0.277	0.0164
ANAPC11	OK	23.9	-0.54	0.185	0.0164
NR2C2AP	OK	11.2	-0.743	0.254	0.0164
TOMM34	OK	20	-0.771	0.264	0.0164
WWC2	OK	13.1	0.846	0.289	0.0164
GLO1	OK	44.2	-0.603	0.206	0.0164
ERMN	OK	19.5	0.769	0.264	0.0166
RRAGD	OK	23.4	0.804	0.276	0.0167
NARS2	OK	11.8	-0.712	0.244	0.0168
TNS3	OK	163	0.736	0.253	0.0168
CACUL1	OK	62.6	0.478	0.164	0.0169
CCDC124	OK	39.6	-0.649	0.223	0.0169
TLR2	OK	188	0.897	0.308	0.0169
STK3	OK	11.3	0.661	0.227	0.0169
TMEM2	OK	191	0.478	0.164	0.0169
FOXO4	OK	20.1	0.534	0.184	0.0169
SAV1	OK	23.7	0.594	0.204	0.017
GTF2A2	OK	36.2	-0.607	0.209	0.017
GBA	OK	27.2	0.708	0.244	0.0171
GPX1	OK	70.3	0.803	0.276	0.0171
SEC24D	OK	47.9	0.451	0.155	0.0171
C4orf3	OK	126	0.532	0.183	0.0171
PCK2	OK	14.5	-0.79	0.272	0.0172
TMEM189	OK	20.5	0.826	0.284	0.0172
PIGG	OK	25.1	0.498	0.172	0.0172
ITCH	OK	100	0.367	0.126	0.0173
CD81	OK	111	0.582	0.201	0.0174
GLT25D1	OK	81.9	0.624	0.215	0.0174
RCC2	OK	119	-0.339	0.117	0.0175
POLR3E	OK	38.5	-0.451	0.156	0.0175
FYN	OK	290	0.432	0.149	0.0176
LINC00294	OK	17.2	0.635	0.22	0.0177
ERI3	OK	10.2	-0.722	0.25	0.0178
POLR1C	OK	21.6	-0.601	0.208	0.0179
FAM120A	OK	119	-0.315	0.109	0.0179
RAB18	OK	70.4	0.387	0.134	0.018
CCPG1	OK	13.8	0.763	0.264	0.018
SLC39A8	OK	361	0.913	0.316	0.018
LSM4	OK	23.4	-0.594	0.206	0.0181
MITD1	OK	30.1	-0.535	0.186	0.0181
ZFYVE20	OK	37.2	0.478	0.166	0.0181
FGFBP2	OK	11.5	1.06	0.366	0.0181
PTPN7	OK	85.1	-0.545	0.189	0.0182
SFXN3	OK	27.8	0.706	0.245	0.0182
ARF6	OK	301	-0.276	0.096	0.0182
TGIF1	OK	55	0.608	0.211	0.0182
GTPBP3	OK	14	-0.707	0.245	0.0182
PIGA	OK	22.9	0.748	0.26	0.0182
SECISBP2L	OK	90.7	0.383	0.133	0.0183
PDXDC2P	OK	22.6	0.541	0.188	0.0183
CTDSP1	OK	53.5	0.526	0.183	0.0183
MYD88	OK	68.8	0.397	0.138	0.0183
CDV3	OK	301	-0.232	0.0806	0.0183
DCTD	OK	37.5	-0.407	0.141	0.0183
ZNF236	OK	28.9	0.423	0.147	0.0184
GLS	OK	252	-0.407	0.141	0.0184
GPSM3	OK	121	0.462	0.161	0.0184
PCBP2	OK	315	-0.202	0.0703	0.0185
TECR	OK	26.4	-0.555	0.193	0.0185
ZFP36L2	OK	242	0.684	0.238	0.0185
SIPA1	OK	87.7	0.449	0.156	0.0186
LTBP4	OK	20.1	-0.594	0.207	0.0186
LOC401320	OK	13.6	0.816	0.284	0.0186
NUP205	OK	85.5	-0.484	0.168	0.0186
FAM134C	OK	60.3	0.319	0.111	0.0187
NBR1	OK	109	0.463	0.162	0.0188
RPS6KC1	OK	30.1	0.547	0.191	0.0189
CCDC88A	OK	124	0.636	0.222	0.0189
DNAJB6	OK	122	0.475	0.166	0.0189
SLC43A3	OK	133	0.651	0.227	0.019
ANO6	OK	96.9	0.638	0.223	0.019
TFDP1	OK	37.7	-0.444	0.155	0.019
HERC1	OK	273	0.391	0.137	0.019
SENP7	OK	43.9	0.548	0.192	0.019
HDDC2	OK	15.1	-0.613	0.214	0.019
FSD1L	OK	39.8	0.894	0.312	0.019
LCOR	OK	102	0.462	0.162	0.0191
PSMD3	OK	73.6	-0.466	0.163	0.0191
EIF2A	OK	79.3	-0.418	0.146	0.0191
SMARCA5	OK	151	-0.323	0.113	0.0191
ADAM9	OK	108	0.805	0.281	0.0191
RB1CC1	OK	78.5	0.553	0.193	0.0191
LAGE3	OK	12.7	-0.697	0.244	0.0192
FRAT2	OK	14.5	0.848	0.297	0.0193
RAP1B	OK	88.1	0.399	0.14	0.0193
CASP2	OK	49.3	-0.407	0.143	0.0193
CPM	OK	46.1	0.925	0.324	0.0194
RPL7L1	OK	21	-0.628	0.22	0.0194
DCUN1D5	OK	24.2	-0.547	0.192	0.0195
DCAF5	OK	90.5	0.302	0.106	0.0195
C15orf39	OK	48.1	0.472	0.165	0.0195
MYO19	OK	21.4	-0.614	0.215	0.0195
KLC2	OK	29.9	-0.607	0.213	0.0196
EPC2	OK	38.7	0.451	0.158	0.0196
SNRPB2	OK	46.9	-0.532	0.187	0.0196
TMED5	OK	126	0.459	0.161	0.0197
CAMSAP2	OK	18.7	0.729	0.256	0.0197
EIF2D	OK	15.1	-0.666	0.234	0.0197
GSE1	OK	45.1	0.648	0.228	0.0197
ADORA2A	OK	114	0.799	0.28	0.0197
LGALS1	OK	125	0.687	0.241	0.0197
PAG1	OK	284	0.485	0.17	0.0197
ZBTB37	OK	16.7	0.571	0.201	0.0198
OAZ2	OK	53.6	0.603	0.212	0.0198
SURF6	OK	31.9	-0.457	0.161	0.0198
ARL6IP4	OK	54.9	-0.482	0.169	0.0199
ELF1	OK	135	0.406	0.143	0.0199
PHF5A	OK	24.7	-0.55	0.194	0.0199
CHFR	OK	69.3	0.353	0.124	0.02
VRK1	OK	14.1	-0.697	0.245	0.02
RANGRF	OK	13.7	-0.658	0.232	0.02
YPEL5	OK	74.8	0.521	0.183	0.02
ACTR1B	OK	46.7	-0.378	0.133	0.02
EPB41L2	OK	26.5	-0.559	0.197	0.02
C8orf59	OK	17.9	-0.633	0.223	0.02
SIT1	OK	12.4	-0.817	0.288	0.02
DHX40	OK	27.7	0.52	0.183	0.0201
POLA1	OK	17.7	-0.642	0.226	0.0201
NCOA4	OK	275	0.45	0.159	0.0202
PRKAR1A	OK	327	0.316	0.112	0.0202
SLBP	OK	32.5	-0.519	0.183	0.0202
SLC35B2	OK	28	0.454	0.16	0.0202
PRDM2	OK	177	0.393	0.139	0.0203
IL1RAP	OK	23.5	0.866	0.306	0.0203
SAT1	OK	377	0.733	0.259	0.0203
RPS27	OK	417	-0.352	0.124	0.0204
KLRC1	OK	13.4	0.902	0.318	0.0204
GCNT1	OK	19.5	-0.681	0.241	0.0204
CDK17	OK	72.8	0.401	0.142	0.0205
MORC3	OK	90.5	0.387	0.137	0.0205
FAM13B	OK	82.8	0.427	0.151	0.0205
BRAF	OK	33	0.435	0.154	0.0205
SLC36A1	OK	39.3	0.805	0.285	0.0206
CPSF3	OK	24.1	-0.546	0.193	0.0207
URM1	OK	43.7	-0.428	0.152	0.0207
ZC3H8	OK	11.1	-0.746	0.264	0.0208
C14orf1	OK	14.8	-0.85	0.301	0.0209
TMBIM1	OK	133	0.493	0.175	0.0209
GBA2	OK	48.1	0.45	0.159	0.0209
MAP1LC3B	OK	57.9	0.451	0.16	0.021
PPM1F	OK	41.7	0.581	0.206	0.021
ANXA2	OK	228	0.516	0.183	0.0212
EVI2B	OK	84.5	0.667	0.237	0.0212
AP2B1	OK	160	-0.276	0.0979	0.0212
DARS	OK	77.1	-0.411	0.146	0.0212
TIAM1	OK	57.6	-0.549	0.195	0.0213
RNMTL1	OK	10.1	-0.742	0.264	0.0214
DEDD2	OK	29.8	0.644	0.229	0.0214
UBAP2	OK	21.5	-0.58	0.206	0.0214
SCP2	OK	39.6	-0.439	0.156	0.0216
FAM129A	OK	246	0.564	0.201	0.0216
PPP1R14B	OK	30.4	-0.593	0.211	0.0216
IKZF3	OK	446	-0.574	0.204	0.0216
PIP5K1C	OK	43.3	0.396	0.141	0.0216
FPR1	OK	56.1	0.894	0.318	0.0216
TSPAN5	OK	11.8	-0.701	0.25	0.0216
RPGR	OK	17.5	0.718	0.256	0.0217
PEA15	OK	199	0.48	0.171	0.0218
LEF1	OK	58.8	-0.724	0.258	0.0218
EIF3J	OK	68.4	-0.46	0.164	0.0219
KIAA0430	OK	160	0.403	0.144	0.0219
TSR2	OK	30.4	-0.458	0.163	0.0219
RAB8B	OK	188	0.385	0.138	0.0221
MCM3AP	OK	116	0.264	0.0943	0.0221
THOC7	OK	20.8	-0.657	0.235	0.0221
WBSCR22	OK	34.8	-0.543	0.194	0.0221
OSGIN2	OK	67.2	0.657	0.235	0.0221
STARD8	OK	24	0.672	0.24	0.0221
PABPC4	OK	204	-0.318	0.114	0.0222
PSME2	OK	193	-0.638	0.228	0.0223
CTU2	OK	10.3	-0.844	0.302	0.0223
SMAD4	OK	76.7	0.435	0.156	0.0223
ABRACL	OK	32.8	-0.569	0.204	0.0223
CTDSP2	OK	134	0.41	0.147	0.0224
ATP6V0D1	OK	53.4	0.526	0.188	0.0224
PRR14L	OK	106	0.286	0.102	0.0224
PLK3	OK	62.1	0.637	0.228	0.0225
ECHS1	OK	26.8	-0.575	0.206	0.0225
STX5	OK	35.9	0.393	0.141	0.0225
43718	OK	14.8	0.887	0.318	0.0225
NCK1	OK	24	0.543	0.195	0.0226
HMGB2	OK	47.7	0.46	0.165	0.0226
ASUN	OK	24.4	-0.556	0.2	0.0227
ZNF512B	OK	23.9	-0.643	0.231	0.0227
UBLCP1	OK	37.4	-0.401	0.144	0.0227
AVL9	OK	29	0.472	0.17	0.0227
MECP2	OK	110	0.295	0.106	0.0227
LAD1	OK	13.9	0.938	0.337	0.0228
MTA1	OK	44	-0.394	0.142	0.0228
TTPAL	OK	31.3	-0.463	0.166	0.0228
UMPS	OK	20	-0.677	0.243	0.0228
HNRNPH1	OK	510	-0.266	0.0954	0.0228
WDR74	OK	23.7	-0.616	0.221	0.023
RAB5B	OK	106	0.269	0.0966	0.023
C4orf46	OK	10.4	-0.758	0.273	0.023
LOC100216545	OK	21.7	0.538	0.194	0.023
SP3	OK	163	0.476	0.171	0.0231
SAMSN1	OK	251	0.562	0.202	0.0231
TLR8	OK	80.4	0.738	0.266	0.0231
GTPBP1	OK	100	0.381	0.137	0.0233
LRP8	OK	34.4	-0.676	0.244	0.0234
HCAR2	OK	29	1.06	0.381	0.0234
GIPC1	OK	17.2	-0.61	0.22	0.0234
DRG1	OK	36.1	-0.487	0.176	0.0234
BRD1	OK	76.4	0.372	0.134	0.0234
COPG1	OK	109	0.335	0.121	0.0234
KIAA0226	OK	135	0.377	0.136	0.0234
HNRNPD	OK	259	-0.351	0.127	0.0234
FCHO2	OK	20	0.919	0.331	0.0234
C6orf106	OK	142	0.27	0.0974	0.0234
SGMS1	OK	35.5	0.43	0.155	0.0235
PARP6	OK	40.9	0.542	0.195	0.0235
NDUFA6	OK	34.8	-0.47	0.17	0.0235
CCRL2	OK	43.8	0.791	0.286	0.0235
NDST1	OK	51.8	0.727	0.263	0.0235
ACOT7	OK	13.5	-0.873	0.316	0.0236
ZZEF1	OK	157	0.3	0.109	0.0236
STRA13	OK	15.2	-0.67	0.242	0.0236
ENOPH1	OK	23.3	-0.498	0.18	0.0236
IER5	OK	156	0.563	0.204	0.0237
STX3	OK	34.2	0.608	0.22	0.0237
LAT2	OK	68.3	0.467	0.169	0.0237
CHRAC1	OK	22.4	-0.545	0.197	0.0237
SEC16A	OK	195	0.251	0.0907	0.0237
UBQLN4	OK	19.9	-0.572	0.207	0.0238
R3HDM1	OK	25.9	-0.492	0.178	0.0238
PSMF1	OK	66.7	-0.365	0.132	0.0238
SDCCAG8	OK	23.4	0.71	0.257	0.0239
ZNF438	OK	11.7	0.782	0.283	0.0239
CARS	OK	40.9	-0.424	0.154	0.0241
VASH1	OK	47.6	0.925	0.335	0.0242
DDX56	OK	41.7	-0.46	0.167	0.0242
C1orf85	OK	14.5	0.662	0.24	0.0243
NFYB	OK	14	-0.615	0.223	0.0243
TMOD3	OK	105	0.324	0.117	0.0243
RNF111	OK	56.5	0.361	0.131	0.0243
CNOT7	OK	63.3	-0.352	0.128	0.0243
KAT6A	OK	203	0.271	0.0985	0.0243
SLC2A4RG	OK	18.6	-0.631	0.229	0.0244
C8orf33	OK	22	-0.589	0.214	0.0244
ATP5G2	OK	56.4	-0.427	0.155	0.0245
TP53INP2	OK	29.4	0.795	0.289	0.0245
DNAJB11	OK	74.9	-0.405	0.147	0.0245
AP2A2	OK	40.1	0.415	0.151	0.0246
ATG16L2	OK	36.7	0.544	0.198	0.0248
YIPF3	OK	30.6	0.512	0.187	0.0248
TTYH3	OK	68.5	0.704	0.256	0.0248
TRIM62	OK	13.4	0.645	0.235	0.0249
SLC39A9	OK	53.8	0.337	0.123	0.0249
RFK	OK	16.8	-0.552	0.201	0.0249
CD48	OK	148	0.367	0.134	0.025
MPZL1	OK	37.8	0.747	0.272	0.025
UNG	OK	12.1	-0.691	0.252	0.025
HIF1A-AS2	OK	18.5	0.911	0.332	0.025
F11R	OK	37.6	0.567	0.207	0.0251
CPNE8	OK	11.1	0.784	0.286	0.0251
GNPTAB	OK	139	0.365	0.133	0.0251
FUS	OK	347	-0.364	0.133	0.0251
SH3BP5-AS1	OK	47.2	0.492	0.18	0.0251
RAB32	OK	10.8	0.881	0.321	0.0251
GSTK1	OK	57.9	-0.414	0.151	0.0251
SLC16A6	OK	32.2	0.83	0.303	0.0252
TMEM147	OK	13.3	-0.594	0.217	0.0252
CDR2	OK	28.5	-0.566	0.207	0.0253
LAIR1	OK	47.9	0.737	0.269	0.0253
ANAPC5	OK	64.3	-0.424	0.155	0.0254
PRPSAP2	OK	17.2	-0.554	0.202	0.0254
LRBA	OK	110	-0.512	0.187	0.0254
SMURF2	OK	31	0.475	0.174	0.0255
CYTH1	OK	271	0.286	0.104	0.0255
TRIM56	OK	103	0.386	0.141	0.0255
EIF3H	OK	130	-0.278	0.102	0.0256
DHRSX	OK	10	0.647	0.237	0.0256
LUZP1	OK	81.4	0.494	0.181	0.0257
ENTPD4	OK	120	0.354	0.13	0.0257
LAPTM4B	OK	10.4	-0.924	0.338	0.0257
FOS	OK	18.6	1.05	0.387	0.0258
TNK2	OK	83.4	0.417	0.153	0.0258
CMC2	OK	12.3	-0.617	0.226	0.0259
POLD1	OK	31	-0.63	0.231	0.0259
PHKB	OK	54.3	0.418	0.153	0.026
CHD1L	OK	32.2	-0.514	0.189	0.0262
SELL	OK	195	-0.568	0.209	0.0262
TAF1D	OK	52.1	-0.455	0.167	0.0262
TOM1L2	OK	16.5	0.578	0.212	0.0262
PSMB2	OK	63.1	-0.432	0.159	0.0263
SSH2	OK	139	0.582	0.214	0.0263
RBM5	OK	144	0.298	0.109	0.0263
UBAP2L	OK	131	-0.336	0.123	0.0264
[truncated: 21,711 more rows]

## Sheet: De-seq counts
	Healthy Control Monocytes										Sarcoid Monocytes
DDX11L1	0	0	0	0	0	0	0	0	0	0	0	0	0	0	0	0	0	0
WASH7P	2	1	0	1	1	1	2	3	0	1	0	2	1	1	0	0	1	1
FAM138A	0	0	0	0	0	0	0	0	0	0	0	0	0	0	0	0	0	0
FAM138F	0	0	0	0	0	0	0	0	0	0	0	0	0	0	0	0	0	0
OR4F5	0	0	0	0	0	0	0	0	0	0	0	0	0	0	0	0	0	0
LOC729737	0	16	2	1	38	5	5	2	1	2	0	4	5	6	3	2	0	8
LOC100132287	0	0	0	0	0	0	0	0	0	0	0	0	0	0	0	0	0	0
LOC100132062	0	0	0	0	0	0	0	0	0	0	0	0	0	0	0	0	0	0
LOC100133331	4	6	1	1	7	0	1	1	3	2	2	1	4	2	0	0	4	11
OR4F29	0	0	0	0	0	0	0	0	0	0	0	0	0	0	0	0	0	0
OR4F16	0	0	0	0	0	0	0	0	0	0	0	0	0	0	0	0	0	0
OR4F3	0	0	0	0	0	0	0	0	0	0	0	0	0	0	0	0	0	0
LOC100288069	0	5	0	1	11	0	0	1	1	2	1	1	2	1	1	0	1	3
LINC00115	1	5	1	3	2	5	1	3	0	0	1	1	0	3	1	0	1	7
LOC643837	9	32	6	9	42	29	7	23	6	6	4	4	13	10	8	5	7	17
FAM41C	0	0	0	0	0	0	0	0	0	0	0	0	0	0	0	0	0	0
LOC100130417	0	0	0	0	0	0	0	0	0	0	0	0	0	0	0	0	0	0
SAMD11	3	0	0	0	4	1	0	1	0	0	0	1	1	0	0	0	0	0
NOC2L	106	77	98	52	330	185	59	87	86	38	18	19	75	36	16	27	22	48
KLHL17	17	24	13	7	46	24	2	15	11	9	4	11	21	15	3	5	6	13
PLEKHN1	6	10	2	3	2	9	6	6	5	2	0	4	1	8	0	2	3	8
C1orf170	1	0	0	0	0	0	0	0	0	0	0	2	0	0	0	0	0	0
HES4	4	5	1	0	4	2	1	6	2	3	3	1	1	2	0	4	2	0
ISG15	28	48	16	10	213	30	45	28	45	23	51	13	18	15	4	48	13	41
AGRN	122	67	97	30	342	80	67	93	93	50	33	93	117	156	60	68	103	81
RNF223	2	0	0	0	0	0	0	1	0	0	0	0	1	0	0	0	0	1
C1orf159	5	13	6	4	41	21	5	15	6	2	5	3	15	5	3	2	4	10
LOC254099	0	0	0	0	0	0	0	0	0	0	0	0	0	0	0	0	0	0
MIR200B	0	0	0	0	0	0	0	0	0	0	0	0	0	0	0	0	0	0
MIR200A	0	0	0	0	0	0	0	0	0	0	0	0	0	0	0	0	0	0
MIR429	0	0	0	0	0	0	0	0	0	0	0	0	0	0	0	0	0	0
TTLL10	0	0	0	0	0	0	0	0	0	0	0	0	0	0	0	0	0	0
TNFRSF18	50	50	60	61	271	167	58	115	53	59	4	14	74	89	21	32	42	19
TNFRSF4	134	71	56	50	518	228	112	215	117	96	7	36	124	123	25	30	41	18
SDF4	191	175	133	77	447	308	96	178	109	99	43	139	180	170	63	85	88	185
B3GALT6	31	22	20	16	112	48	15	28	22	14	4	10	25	16	10	17	10	14
FAM132A	0	0	0	0	0	0	0	0	0	1	0	0	0	1	0	0	0	1
UBE2J2	54	55	60	27	149	90	37	60	38	39	14	39	63	44	20	12	29	59
SCNN1D	2	2	7	2	2	4	2	2	3	1	0	1	2	2	0	0	2	3
ACAP3	20	33	21	8	103	52	17	32	11	13	5	23	26	32	15	7	14	31
PUSL1	7	8	2	5	21	11	3	7	3	2	0	7	6	6	4	2	2	4
CPSF3L	75	105	70	37	191	99	40	66	39	46	11	39	73	55	32	23	28	43
GLTPD1	8	15	7	8	14	20	6	12	13	4	3	8	17	6	10	5	6	17
TAS1R3	1	0	0	0	0	2	0	0	0	0	1	0	0	0	0	0	0	1
DVL1	31	58	50	24	117	74	28	45	33	23	10	62	58	35	25	19	24	49
MXRA8	2	0	0	0	2	1	0	0	3	0	0	0	0	0	0	0	0	3
AURKAIP1	51	43	30	29	123	81	27	36	33	31	10	24	48	36	12	14	17	36
CCNL2	122	206	92	67	312	214	63	104	94	71	33	80	165	106	69	55	60	213
LOC148413	23	25	15	7	53	36	9	17	13	17	3	10	18	14	2	8	6	20
MRPL20	54	62	39	25	172	109	28	60	48	31	6	12	43	24	15	14	27	30
ANKRD65	0	0	0	0	0	0	0	0	0	0	0	0	0	0	0	0	0	0
TMEM88B	0	0	0	0	0	0	0	0	0	0	0	0	0	0	0	0	0	0
VWA1	0	0	0	0	0	0	0	0	0	1	0	0	0	0	0	0	0	0
ATAD3C	0	1	0	0	0	2	0	0	0	1	0	0	0	0	0	0	0	0
ATAD3B	16	25	46	11	107	61	22	32	26	19	4	16	26	15	4	5	5	22
ATAD3A	25	13	19	16	55	21	11	19	13	8	4	2	10	4	8	3	8	12
TMEM240	0	0	0	0	0	0	0	0	0	0	0	0	0	0	0	0	0	0
SSU72	61	57	30	25	172	109	35	54	51	27	14	30	63	32	15	17	18	59
C1orf233	4	4	0	0	4	2	1	1	0	0	0	0	0	0	1	1	1	1
MIB2	16	25	10	12	29	29	8	18	10	9	8	15	24	12	9	5	6	49
MMP23B	1	0	0	0	0	0	0	0	0	0	0	2	2	0	0	0	1	2
MMP23A	0	0	0	0	0	0	0	0	0	0	0	0	0	0	0	0	0	0
CDK11B	29	29	21	16	43	34	18	33	30	9	13	20	22	22	9	5	9	19
SLC35E2B	32	93	41	27	65	91	31	82	48	36	15	40	74	57	29	20	26	124
CDK11A	10	41	11	12	44	48	6	24	10	12	9	10	14	32	6	3	13	23
SLC35E2	10	42	18	11	75	39	11	25	12	9	6	12	26	16	14	9	12	38
NADK	104	167	58	31	215	145	49	93	74	48	28	191	94	133	46	45	50	142
GNB1	414	531	274	180	1011	647	271	419	236	182	87	293	391	404	166	147	218	427
CALML6	0	0	0	0	0	0	0	0	0	0	0	0	0	0	0	0	0	0
TMEM52	0	2	0	0	0	0	0	0	0	0	0	0	0	0	0	0	0	0
KIAA1751	0	0	0	0	0	0	0	0	0	0	0	0	0	0	0	0	0	0
GABRD	0	0	0	0	0	0	0	0	0	0	0	0	0	0	0	0	0	0
PRKCZ	17	16	7	6	47	30	5	10	14	21	6	6	17	11	4	4	5	9
C1orf86	25	18	13	7	53	39	11	19	18	14	5	9	17	11	5	4	11	18
SKI	91	177	60	50	194	149	56	101	63	48	48	101	120	100	75	42	59	203
MORN1	3	7	0	1	1	1	0	2	3	2	0	0	8	2	0	1	0	4
LOC100129534	1	1	0	0	0	1	0	1	0	0	1	0	0	1	0	0	0	2
RER1	50	86	52	45	174	147	41	78	62	41	15	45	71	62	32	24	23	114
PEX10	13	10	7	8	15	13	9	8	17	5	1	3	11	5	0	2	6	3
PLCH2	4	9	1	7	18	3	3	7	3	6	0	3	11	6	1	0	5	41
PANK4	22	50	25	15	88	45	24	28	16	22	13	27	38	32	19	11	15	45
HES5	0	0	0	0	1	0	0	0	0	0	0	0	0	0	0	0	0	0
LOC115110	11	10	4	8	16	12	8	8	3	2	1	2	15	3	4	3	1	16
LOC100133445	6	9	6	2	8	10	2	3	4	1	0	13	13	3	3	0	4	16
TNFRSF14	153	197	111	58	346	271	92	169	126	63	37	165	160	159	54	72	91	180
FAM213B	38	47	23	14	109	52	20	33	39	30	4	69	31	41	9	4	18	20
MMEL1	3	1	0	1	0	0	0	0	0	2	0	2	0	2	0	1	1	0
TTC34	0	0	0	1	1	0	0	0	0	0	0	0	0	0	0	0	0	0
ACTRT2	0	0	0	0	0	0	0	0	0	0	0	0	0	0	0	0	0	0
FLJ42875	0	0	0	0	0	0	0	0	0	0	0	0	0	0	0	0	0	0
PRDM16	0	0	0	0	0	1	1	0	1	0	0	0	4	0	0	1	0	0
MIR4251	0	0	0	0	0	0	0	0	0	0	0	0	0	0	0	0	0	0
ARHGEF16	0	0	0	0	0	0	0	0	0	0	0	0	0	0	0	0	0	0
MEGF6	10	33	13	4	30	26	7	21	11	11	2	4	26	7	13	4	2	32
MIR551A	0	0	0	0	0	0	0	0	0	0	0	0	0	0	0	0	0	0
TPRG1L	32	73	28	21	79	70	29	45	22	19	12	40	48	42	21	8	17	88
WRAP73	16	27	15	8	31	27	9	16	13	6	6	7	18	5	3	3	2	14
TP73	0	0	0	0	0	3	0	1	0	1	0	2	0	0	0	2	1	0
TP73-AS1	26	60	28	7	94	29	18	29	30	14	10	19	39	13	15	4	13	54
CCDC27	0	0	0	0	0	0	0	0	0	0	0	0	0	0	0	0	0	0
SMIM1	0	0	0	0	0	0	0	0	0	0	0	0	1	0	0	1	0	0
LRRC47	33	58	29	31	132	90	26	43	47	24	13	23	50	39	13	18	23	56
CEP104	42	75	31	35	130	96	30	42	36	31	20	22	73	42	23	14	26	75
DFFB	14	9	11	4	44	22	2	11	19	8	1	7	18	14	2	7	3	15
C1orf174	24	42	10	21	65	42	22	30	26	18	4	11	36	24	9	7	12	31
LOC100133612	0	0	0	1	2	1	0	0	0	0	0	0	0	1	1	0	0	0
LOC728716	0	0	0	0	0	0	0	0	0	0	0	0	0	0	0	0	0	0
LOC284661	0	0	0	0	0	0	0	0	0	0	0	0	0	0	0	0	0	0
AJAP1	0	1	0	0	0	0	0	0	0	0	0	0	1	0	0	0	0	0
MIR4417	0	0	0	0	0	0	0	0	0	0	0	0	0	0	0	0	0	0
MIR4689	0	0	0	0	0	0	0	0	0	0	0	0	0	0	0	0	0	0
NPHP4	8	22	7	8	37	14	9	18	5	8	4	20	18	12	7	5	4	15
KCNAB2	163	299	113	101	454	287	91	153	142	109	53	150	194	122	98	53	74	282
CHD5	0	0	2	2	1	3	1	0	2	1	1	1	3	1	1	1	0	4
RPL22	204	541	143	107	855	475	119	272	212	142	23	73	205	180	56	45	71	233
RNF207	7	4	1	2	27	2	7	7	2	7	0	0	9	8	1	0	4	2
ICMT	36	76	30	28	145	68	45	42	28	24	9	23	43	31	14	4	21	40
HES3	0	0	0	0	0	0	0	0	0	0	0	0	0	0	0	0	0	0
GPR153	3	4	9	8	14	19	4	11	9	4	3	7	14	10	6	7	10	41
ACOT7	23	15	9	19	71	39	11	23	27	15	3	4	24	13	1	6	5	2
HES2	0	0	0	0	0	0	0	0	0	0	0	0	0	0	0	0	0	0
ESPN	2	0	0	0	4	1	0	0	1	1	0	0	4	0	0	0	0	0
MIR4252	0	0	0	0	0	0	0	0	0	0	0	0	0	0	0	0	0	0
TNFRSF25	62	109	34	43	300	156	45	94	76	66	10	8	97	106	26	31	33	66
PLEKHG5	2	7	1	0	18	6	1	4	5	2	0	1	2	1	0	0	2	1
NOL9	52	85	50	22	207	125	39	75	52	36	20	30	69	39	17	22	29	67
TAS1R1	1	0	0	0	0	0	0	0	0	0	0	0	1	0	0	0	0	0
ZBTB48	19	31	21	9	46	33	18	20	15	16	3	21	29	32	13	8	7	35
KLHL21	43	65	46	29	121	71	18	66	49	32	20	76	52	49	28	32	31	71
PHF13	18	42	18	10	57	55	20	30	17	9	7	14	22	29	7	10	15	20
THAP3	10	9	3	5	16	14	10	11	6	9	1	4	5	5	4	4	2	11
DNAJC11	39	60	43	40	210	88	44	73	58	35	12	20	41	34	18	17	20	56
CAMTA1	28	43	14	9	77	47	12	23	24	8	6	14	28	22	14	10	7	28
VAMP3	46	93	32	7	92	58	34	46	21	17	16	68	59	56	20	34	23	77
PER3	1	12	2	7	5	22	4	5	2	0	3	6	8	2	1	2	3	9
UTS2	0	1	0	0	0	5	0	0	0	0	0	0	0	0	0	0	1	0
TNFRSF9	162	163	314	207	504	506	254	261	167	102	8	85	243	176	17	203	148	36
PARK7	200	247	128	100	648	443	129	217	182	84	24	71	158	109	41	43	75	108
ERRFI1	6	13	3	3	11	3	8	8	3	3	3	4	4	8	7	2	3	9
SLC45A1	1	0	1	0	0	0	1	0	0	0	0	0	0	0	1	0	0	0
RERE	98	213	110	48	305	202	72	105	92	62	44	52	135	78	27	38	37	179
ENO1	1127	1684	1272	677	5425	2472	983	1374	1273	758	229	1615	952	1436	364	636	612	393
ENO1-AS1	0	0	0	0	0	0	0	0	0	1	0	0	0	0	0	0	0	0
CA6	3	0	0	0	1	1	0	0	0	0	0	0	1	0	0	0	0	0
SLC2A7	0	0	0	0	0	0	0	0	0	0	0	0	0	0	0	0	0	0
SLC2A5	11	43	5	1	12	5	2	6	9	2	5	20	6	22	4	3	0	12
GPR157	2	8	12	1	19	8	12	8	6	6	1	13	9	11	6	10	20	8
MIR34A	0	0	0	0	0	0	0	0	0	0	0	0	0	0	0	0	0	0
H6PD	70	134	40	54	150	139	61	68	70	36	27	66	104	81	41	44	47	152
SPSB1	14	11	15	6	38	23	5	18	10	11	4	18	16	16	5	11	10	13
SLC25A33	6	9	9	1	25	19	6	17	6	10	0	2	5	10	2	6	5	9
TMEM201	13	11	11	7	52	24	5	11	9	11	4	5	12	5	3	2	3	12
PIK3CD	129	324	162	139	622	432	131	258	170	123	63	138	244	217	73	77	105	251
C1orf200	2	3	2	0	6	1	1	2	1	3	0	0	4	0	1	0	0	3
CLSTN1	79	183	58	73	302	234	73	115	65	67	30	71	126	116	47	31	45	163
CTNNBIP1	6	7	3	3	17	14	1	10	7	5	4	5	12	7	4	3	4	14
LZIC	12	31	13	13	67	42	11	24	15	9	3	10	17	25	4	8	7	31
NMNAT1	12	18	8	4	33	10	5	5	5	5	0	17	9	10	6	4	2	17
RBP7	1	0	0	0	0	0	0	0	0	0	0	0	0	0	0	0	0	0
UBE4B	67	111	58	42	210	138	38	81	56	43	23	64	86	60	35	22	43	97
KIF1B	129	160	83	34	216	198	90	154	101	75	23	187	158	192	96	51	64	186
PGD	349	348	212	98	556	462	240	299	254	167	56	342	298	312	238	146	223	401
APITD1-CORT	0	0	0	0	0	0	0	0	0	0	0	0	0	0	0	0	0	0
APITD1	0	5	1	1	13	7	3	1	1	0	0	0	5	3	0	0	4	0
CORT	0	0	0	0	0	1	1	0	0	0	0	0	1	0	0	0	0	0
DFFA	39	38	28	17	88	70	15	20	30	13	7	11	30	24	7	10	9	24
PEX14	18	24	13	12	30	29	12	15	15	4	6	8	13	12	4	6	11	20
CASZ1	25	29	33	24	67	74	23	32	14	12	13	31	37	37	6	17	29	43
C1orf127	0	0	0	0	0	0	0	0	0	0	0	0	0	0	0	0	0	0
TARDBP	197	420	166	108	694	477	170	249	169	129	74	84	203	188	96	83	96	314
MASP2	1	1	2	0	0	2	0	1	1	0	1	1	1	0	1	0	0	1
SRM	118	64	70	57	346	147	58	89	86	49	8	6	54	23	8	14	29	23
EXOSC10	44	81	56	33	189	133	43	64	51	33	12	38	66	52	25	41	28	79
MTOR	104	153	100	93	359	230	67	131	117	62	35	58	145	107	51	43	67	144
MTOR-AS1	0	0	0	0	0	1	0	0	0	0	0	0	0	0	0	0	0	0
ANGPTL7	0	0	0	0	0	0	0	0	0	0	0	0	0	0	0	0	0	1
UBIAD1	38	53	29	12	95	61	21	38	36	15	7	12	27	23	10	6	20	38
PTCHD2	0	0	0	0	1	0	0	0	1	1	1	0	0	0	0	0	0	0
FBXO2	6	5	1	2	13	14	2	6	7	1	0	1	3	7	1	1	1	0
FBXO44	23	45	23	12	66	60	19	17	21	14	2	12	40	28	8	10	22	27
FBXO6	36	36	9	12	106	40	25	29	25	9	6	13	31	22	3	12	14	14
MAD2L2	28	32	16	9	61	63	24	25	26	14	3	21	29	23	12	11	7	18
DRAXIN	0	0	0	0	1	0	0	0	0	0	1	3	0	1	0	0	1	2
AGTRAP	14	20	5	8	19	25	8	17	17	2	6	27	14	19	12	10	8	45
MTHFR	59	83	44	29	166	114	44	50	45	32	18	39	76	69	11	23	24	88
CLCN6	41	70	38	23	149	92	43	50	39	24	14	56	55	49	16	25	29	69
NPPA-AS1	4	3	3	2	5	7	2	1	1	1	0	1	0	2	0	2	0	1
NPPA	0	0	1	0	0	0	0	0	0	0	0	1	0	0	0	0	0	0
NPPB	0	0	0	0	0	0	0	0	0	0	0	0	0	0	0	0	0	0
KIAA2013	26	36	20	16	71	54	13	19	24	16	11	18	24	14	15	18	9	45
PLOD1	21	20	11	9	32	30	14	17	14	7	5	17	6	12	7	5	8	41
MFN2	97	137	101	68	342	204	85	139	95	47	38	65	116	77	42	33	50	130
MIIP	35	38	19	16	107	58	18	29	33	11	7	12	30	35	2	15	15	41
TNFRSF8	17	45	19	16	112	60	17	26	10	13	6	50	20	36	12	10	6	6
TNFRSF1B	1058	2000	1139	213	2375	988	514	904	373	429	322	2848	1022	2592	550	756	831	825
MIR4632	0	0	0	0	0	0	0	1	0	0	0	0	0	0	0	0	0	0
VPS13D	133	358	147	117	515	396	106	240	164	129	71	127	248	178	101	83	84	391
SNORA59B	0	0	0	0	0	0	0	0	0	0	0	0	0	0	0	0	0	0
SNORA59A	0	0	0	0	0	0	0	0	0	0	0	0	0	0	0	0	0	0
DHRS3	28	29	15	13	63	21	5	19	15	7	3	3	37	4	2	3	10	22
AADACL4	0	0	0	0	0	0	0	0	0	0	0	0	0	0	0	0	0	0
AADACL3	0	0	0	0	0	0	0	0	0	0	0	0	0	0	0	0	0	0
C1orf158	0	0	0	0	0	0	0	0	0	0	0	0	0	0	0	0	0	0
PRAMEF12	0	0	0	0	0	0	0	0	0	0	0	0	0	0	0	0	0	0
PRAMEF1	0	0	0	0	0	0	0	0	0	0	0	0	0	0	0	0	0	0
PRAMEF11	0	0	0	0	0	0	0	0	0	0	0	0	0	0	0	0	0	0
LOC649330	0	0	0	0	0	0	0	0	0	0	0	0	0	0	0	0	0	0
HNRNPCL1	0	0	0	0	0	0	0	0	0	0	0	0	0	0	0	0	0	0
PRAMEF2	0	0	0	0	0	0	0	0	0	0	0	0	0	0	0	0	0	0
PRAMEF4	0	0	0	0	0	0	0	0	0	0	0	0	0	0	0	0	0	0
PRAMEF10	0	0	0	0	0	0	0	0	0	0	0	0	0	0	0	0	0	0
PRAMEF8	0	0	0	0	0	0	0	0	0	0	0	0	0	0	0	0	0	0
PRAMEF7	0	0	0	0	0	0	0	0	0	0	0	0	0	0	0	0	0	0
PRAMEF6	0	0	0	0	0	0	0	0	0	0	0	0	0	0	0	0	0	0
PRAMEF22	0	0	0	0	0	0	0	0	0	0	0	0	0	0	0	0	0	0
PRAMEF5	0	0	0	0	0	0	0	0	0	0	0	0	0	0	0	0	0	0
LOC440563	0	0	0	0	0	0	0	0	0	0	0	0	0	0	0	0	0	0
PRAMEF3	0	0	0	0	0	0	0	0	0	0	0	0	0	0	0	0	0	0
PRAMEF9	0	0	0	0	0	0	0	0	0	0	0	0	0	0	0	0	0	0
PRAMEF15	0	0	0	0	0	0	0	0	0	0	0	0	0	0	0	0	0	0
PRAMEF14	0	0	0	0	0	0	0	0	0	0	0	0	0	0	0	0	0	0
PRAMEF13	0	0	0	0	0	0	0	0	0	0	0	0	0	0	0	0	0	0
PRAMEF19	0	0	0	0	0	0	0	0	0	0	0	0	0	0	0	0	0	0
PRAMEF18	0	0	0	0	0	0	0	0	0	0	0	0	0	0	0	0	0	0
PRAMEF16	0	0	0	0	0	0	0	0	0	0	0	0	0	0	0	0	0	0
PRAMEF20	0	0	0	0	0	0	0	0	0	0	0	0	0	0	0	0	0	0
PRAMEF21	0	0	0	0	0	0	0	0	0	0	0	0	0	0	0	0	0	0
PRAMEF17	0	0	0	0	0	0	0	0	0	0	0	0	0	0	0	0	0	0
LRRC38	1	1	0	0	0	0	0	0	0	0	0	1	0	2	1	1	2	1
PDPN	30	69	6	2	12	20	3	25	6	8	0	30	26	8	36	2	2	96
PRDM2	163	456	141	88	475	382	119	207	156	133	78	236	223	191	113	87	98	380
KAZN	0	0	0	0	1	0	1	0	0	0	0	0	1	0	0	0	0	1
TMEM51-AS1	0	3	0	1	0	1	0	2	1	1	0	1	2	6	2	1	0	3
TMEM51	24	78	19	5	13	16	10	23	19	11	6	74	31	50	27	14	14	50
FHAD1	15	17	1	0	3	2	0	3	4	1	3	8	2	5	4	4	3	6
EFHD2	237	240	137	139	440	350	139	228	100	109	65	266	296	210	110	94	167	343
CTRC	0	0	0	0	0	0	0	1	1	0	0	0	2	0	0	1	1	0
CELA2A	0	0	0	0	0	0	0	0	0	0	0	0	0	0	0	0	0	0
CELA2B	0	0	0	0	0	0	0	0	0	0	0	0	0	0	0	0	0	0
CASP9	5	20	7	11	19	18	8	16	9	8	3	11	17	9	3	5	5	18
DNAJC16	24	66	17	20	120	74	21	49	26	16	2	23	45	29	18	20	14	74
AGMAT	11	14	15	6	45	39	6	15	17	18	0	0	8	7	1	3	3	10
DDI2	21	36	24	23	90	41	22	21	21	11	6	14	48	24	13	11	7	27
RSC1A1	8	15	5	1	16	12	4	7	13	5	2	2	11	8	6	1	5	14
PLEKHM2	136	194	115	54	372	211	95	146	109	69	38	187	145	143	76	67	99	230
SLC25A34	1	7	2	0	7	7	1	3	0	2	0	0	0	0	2	0	2	4
TMEM82	0	0	0	0	0	0	0	0	0	0	0	0	0	0	0	0	0	0
FBLIM1	0	0	0	0	0	0	0	0	0	0	2	0	0	0	0	0	0	0
UQCRHL	1	7	1	1	4	1	0	3	5	0	0	0	1	0	0	0	2	0
FLJ37453	8	11	4	9	25	14	2	6	4	5	2	6	10	4	5	1	10	6
SPEN	330	534	346	211	903	700	231	424	286	227	88	377	384	384	172	155	181	479
ZBTB17	60	122	64	25	216	105	49	77	56	40	20	174	73	187	37	36	58	75
C1orf64	0	0	0	0	0	0	0	0	0	0	0	0	0	0	0	0	0	0
HSPB7	0	0	0	0	0	0	0	0	0	0	0	0	0	0	0	0	0	0
CLCNKA	0	1	0	0	0	0	0	0	0	0	0	0	0	0	0	0	0	0
CLCNKB	0	0	0	0	0	0	0	0	0	0	0	0	0	0	0	0	0	0
FAM131C	0	0	1	0	0	0	0	1	0	0	0	0	0	0	0	0	0	0
EPHA2	0	0	0	0	0	1	0	0	0	0	0	1	0	1	0	1	0	0
ARHGEF19	6	5	8	2	15	12	4	5	9	5	2	2	8	5	1	4	2	2
RSG1	1	3	3	0	4	5	1	5	5	1	1	0	5	1	0	1	0	1
FBXO42	21	40	19	14	68	48	19	33	15	19	7	36	27	26	18	23	18	49
SZRD1	259	295	179	150	680	601	187	295	233	143	64	144	284	276	70	107	168	253
SPATA21	0	0	0	0	2	1	0	0	0	0	0	0	0	0	0	0	0	0
NECAP2	142	190	89	55	360	207	85	121	103	57	24	90	127	132	56	34	65	152
CROCCP3	4	13	9	6	19	11	3	9	7	4	1	6	10	6	6	3	8	20
MIR3675	0	0	0	0	0	0	0	0	0	0	0	0	0	0	0	0	0	0
NBPF1	12	31	13	5	54	19	7	14	9	10	7	16	30	10	5	4	8	23
CROCCP2	36	55	31	24	75	40	11	28	19	12	10	48	60	42	15	12	18	48
MST1P2	1	1	0	0	2	1	0	0	2	0	0	0	1	0	0	0	0	3
ESPNP	0	0	0	0	2	0	0	0	0	0	0	0	0	0	0	0	0	0
MST1L	0	0	0	0	0	0	0	3	0	0	0	0	1	0	0	0	0	2
CROCC	29	43	26	16	88	49	33	30	27	28	5	13	54	26	10	8	20	62
MFAP2	0	0	0	0	0	0	0	0	0	0	0	1	0	0	0	0	0	0
ATP13A2	31	45	20	20	116	60	26	35	31	14	6	27	39	29	14	16	17	28
SDHB	31	54	38	17	154	73	25	53	40	32	4	25	46	36	12	6	23	47
PADI2	1	4	4	0	2	6	2	1	0	4	4	13	1	3	2	1	0	7
PADI1	0	0	0	0	0	0	0	0	0	0	0	0	0	0	0	0	0	0
PADI3	0	0	0	0	0	0	0	0	0	0	0	0	0	0	0	0	0	0
PADI4	0	0	0	0	1	0	0	1	2	0	0	38	3	0	0	0	0	3
PADI6	0	0	0	1	0	0	0	0	0	0	0	0	0	0	0	0	0	0
RCC2	177	198	112	94	444	314	126	188	155	95	31	73	186	111	50	52	68	149
ARHGEF10L	37	64	12	9	37	44	25	40	32	16	16	75	38	75	29	33	28	75
ACTL8	0	0	0	0	0	0	0	0	0	0	0	0	0	0	0	0	0	0
IGSF21	0	0	0	0	0	0	0	0	0	0	0	0	0	0	0	0	0	0
KLHDC7A	1	0	2	0	2	0	1	1	0	0	0	0	0	0	0	0	0	0
PAX7	0	0	0	0	0	0	0	0	0	0	0	0	0	0	0	0	0	0
TAS1R2	0	0	0	2	0	0	0	0	0	0	0	0	0	0	0	0	0	0
ALDH4A1	4	8	3	1	9	6	4	5	3	1	1	1	3	0	2	1	1	1
MIR4695	0	0	0	0	0	0	0	0	0	0	0	0	0	0	0	0	0	0
IFFO2	59	72	37	38	205	141	29	72	49	38	2	26	52	30	11	24	22	62
UBR4	497	854	612	301	1785	1039	457	731	484	315	238	565	761	678	253	328	435	759
EMC1	54	93	60	40	225	149	50	70	60	33	11	25	51	40	19	32	26	59
MRTO4	57	62	50	26	260	121	35	64	47	30	4	4	32	24	6	10	10	14
AKR7L	0	1	0	0	0	1	0	0	0	0	0	0	0	0	0	0	1	1
AKR7A3	0	0	0	0	0	0	0	0	1	0	0	0	0	0	0	0	0	0
LOC100506730	2	3	2	0	6	8	1	2	3	2	0	1	5	0	2	1	2	4
AKR7A2	9	16	12	4	20	24	11	11	14	6	5	7	15	6	2	5	4	16
PQLC2	9	5	1	1	6	6	5	4	5	6	2	6	6	2	1	0	0	13
CAPZB	324	407	186	120	670	537	212	306	236	159	45	184	312	253	121	111	160	409
MINOS1	75	98	64	19	280	160	61	68	78	55	8	18	41	56	19	14	16	48
C1orf151-NBL1	1	0	0	0	0	0	0	0	0	0	0	0	0	0	0	0	0	0
NBL1	0	1	1	0	4	2	1	0	0	0	0	0	0	0	0	0	1	0
HTR6	0	0	0	0	1	0	0	0	0	0	1	0	0	0	0	0	0	0
TMCO4	9	17	11	10	44	33	8	15	25	9	3	5	17	12	1	3	7	24
RNF186	0	0	0	0	0	0	0	0	0	0	0	0	0	0	0	0	0	0
OTUD3	37	58	39	23	124	81	32	52	23	16	19	19	48	48	24	7	14	59
PLA2G2E	0	0	0	0	0	0	0	0	0	0	0	0	0	0	0	0	0	0
PLA2G2A	0	0	0	0	0	0	0	0	0	0	0	0	0	0	0	0	0	0
PLA2G5	0	0	0	0	0	0	0	0	0	0	0	0	0	0	0	0	0	0
PLA2G2D	0	0	0	0	0	0	0	0	0	0	0	0	0	0	0	0	0	0
PLA2G2F	0	0	0	0	0	0	0	0	0	0	0	0	0	0	0	0	0	0
PLA2G2C	0	0	0	0	0	0	0	0	0	0	0	0	0	0	0	0	0	0
UBXN10	0	1	0	0	2	0	0	0	0	0	0	0	1	1	0	1	0	1
VWA5B1	0	0	0	0	0	0	0	0	0	0	0	0	0	0	0	0	0	2
LOC339505	0	0	0	0	0	0	0	0	0	0	0	0	0	0	0	0	0	0
CAMK2N1	2	9	3	4	7	3	6	3	5	2	0	0	2	6	4	0	3	3
MUL1	23	38	16	14	75	52	27	35	27	10	10	15	23	28	12	9	11	39
FAM43B	0	0	0	0	0	0	0	0	0	0	0	0	0	0	0	0	0	0
CDA	0	7	0	0	2	1	0	1	0	0	1	11	2	2	2	1	0	0
PINK1	12	19	11	9	15	28	10	14	9	7	6	20	27	19	13	8	5	46
DDOST	181	229	150	88	533	379	133	211	173	86	46	59	167	156	58	61	83	131
KIF17	0	1	0	0	0	0	0	0	0	0	0	0	0	0	0	0	0	0
SH2D5	0	0	0	0	0	0	2	0	1	0	0	0	1	0	0	0	0	0
HP1BP3	160	478	170	124	484	412	134	216	137	113	45	167	258	229	118	78	89	348
EIF4G3	80	133	73	67	260	258	70	65	48	39	25	62	114	99	27	56	50	119
ECE1	99	94	79	64	455	216	89	164	77	63	20	63	86	107	24	64	38	55
LOC100506801	0	0	1	1	5	2	0	1	0	0	0	0	2	0	2	0	0	1
NBPF3	6	14	8	4	26	21	3	13	10	6	3	4	15	5	2	1	3	4
ALPL	1	1	0	0	0	1	0	0	0	1	0	0	0	0	0	0	0	0
RAP1GAP	0	0	0	0	0	2	0	0	1	0	1	0	0	1	1	0	0	0
USP48	63	184	58	36	269	212	46	98	55	61	37	61	103	99	39	34	41	157
LDLRAD2	0	0	1	0	0	0	0	0	0	0	0	2	0	0	1	0	0	0
HSPG2	0	2	2	2	9	2	2	1	3	7	1	4	3	2	1	0	0	5
CELA3B	0	0	0	0	0	0	0	0	0	0	0	0	0	0	0	0	0	0
CELA3A	0	0	0	0	0	0	0	0	0	0	0	0	0	0	0	0	0	0
LINC00339	4	13	2	5	9	10	1	4	6	6	0	1	5	7	0	2	3	7
CDC42	267	549	226	115	1009	670	249	381	226	154	56	189	271	294	119	140	165	347
WNT4	1	0	3	0	0	2	0	1	0	0	0	0	0	1	0	1	0	0
ZBTB40	70	138	61	54	229	149	56	100	76	46	29	71	107	65	48	34	51	152
EPHA8	0	0	0	0	0	0	0	0	0	0	0	0	2	0	0	0	0	0
C1QA	11	6	2	3	5	8	9	10	2	1	0	1	2	14	3	2	2	18
C1QC	21	7	0	3	11	22	30	24	17	0	0	5	5	12	3	4	10	35
C1QB	23	9	5	5	13	25	38	18	26	3	2	1	8	18	3	7	17	20
EPHB2	1	1	0	0	2	0	0	0	1	0	0	0	0	0	2	1	1	17
MIR4684	0	0	0	0	0	0	0	0	0	0	0	0	0	0	0	0	0	0
MIR4253	0	0	0	0	0	0	0	0	0	0	0	0	0	0	0	0	0	0
LOC729059	0	0	0	0	0	0	0	0	0	0	0	0	0	0	0	0	0	0
KDM1A	48	66	40	23	212	111	41	60	48	36	5	52	55	63	21	16	29	66
MIR3115	0	0	0	0	0	0	0	0	0	0	0	0	0	0	0	0	0	0
LUZP1	45	109	94	40	264	234	68	121	52	36	44	66	141	164	39	47	55	115
HTR1D	0	0	0	0	0	0	0	0	0	0	0	0	0	0	0	0	0	0
HNRNPR	200	312	211	145	849	598	164	279	236	149	38	83	222	169	70	79	106	197
ZNF436	10	29	11	3	32	21	10	16	10	8	3	16	18	15	3	7	7	24
C1orf213	0	7	2	1	2	4	0	2	3	0	0	2	2	1	0	1	0	3
TCEA3	2	2	0	0	2	1	0	3	1	2	0	0	1	2	0	0	0	4
ASAP3	0	0	4	0	0	3	1	1	0	0	0	0	0	0	0	0	0	2
E2F2	0	2	1	0	2	4	0	2	1	6	2	6	2	7	0	2	0	0
ID3	10	31	20	4	27	19	3	14	13	10	2	4	16	5	3	1	7	13
MDS2	0	3	0	0	0	0	0	0	0	0	0	0	0	0	0	0	0	0
RPL11	696	1949	594	390	2900	1855	448	979	977	547	152	272	777	662	287	168	356	836
TCEB3	85	101	68	34	272	169	44	75	56	51	10	62	86	84	35	33	40	88
LOC100506963	1	10	1	2	9	4	2	2	1	2	0	4	3	2	0	2	2	0
PITHD1	43	78	39	32	178	116	33	55	58	19	11	24	41	33	26	20	14	64
LYPLA2	72	83	45	26	212	153	42	66	63	32	13	26	61	55	27	26	23	44
GALE	13	18	10	7	39	24	12	15	15	4	3	3	19	10	6	7	5	16
HMGCL	9	28	12	3	26	27	8	15	11	13	7	12	15	13	3	4	6	20
FUCA1	20	35	11	9	11	19	9	11	5	5	4	5	10	10	28	6	5	161
CNR2	5	18	4	2	11	21	7	3	6	2	1	2	6	2	2	6	2	13
MIR378F	0	0	0	0	0	0	0	0	0	0	0	0	0	0	0	0	0	0
PNRC2	26	36	18	16	42	44	16	18	16	15	13	10	16	20	8	7	12	24
SRSF10	24	32	21	23	71	47	11	27	23	15	5	9	22	9	5	9	10	27
MYOM3	0	0	0	0	0	0	0	0	0	0	0	0	0	0	0	0	0	0
IL22RA1	0	0	0	0	0	0	0	0	0	0	0	0	0	0	0	0	0	0
IFNLR1	17	31	16	16	38	24	9	15	12	5	3	10	12	8	3	8	6	15
LOC284632	0	0	0	0	0	0	0	0	0	0	0	0	0	0	0	0	0	0
GRHL3	0	0	0	0	0	0	0	0	0	0	0	0	0	0	0	0	0	0
STPG1	5	4	0	1	12	6	1	1	2	3	0	1	3	1	0	0	1	1
NIPAL3	39	92	27	30	198	111	33	57	31	29	6	19	62	45	28	14	22	57
RCAN3AS	0	1	0	0	1	0	0	0	0	0	0	0	0	0	0	0	0	0
RCAN3	57	155	42	19	286	119	49	74	58	47	8	7	79	54	42	19	22	101
NCMAP	2	5	0	0	5	0	3	1	1	0	0	0	1	3	2	1	0	1
SRRM1	118	349	113	90	508	339	84	171	123	113	37	89	182	113	52	62	72	233
CLIC4	104	188	56	25	228	187	96	158	33	52	24	117	154	139	53	75	88	179
RUNX3	377	560	298	316	1167	985	272	539	302	271	103	190	527	321	127	150	203	575
SYF2	75	175	63	38	244	174	46	66	57	59	14	48	88	54	46	20	42	106
C1orf63	68	206	92	61	183	125	59	100	79	28	39	97	140	111	83	46	43	240
RHD	0	0	0	0	0	1	0	0	0	0	0	3	0	0	1	0	0	1
TMEM50A	165	240	118	73	502	257	95	202	126	72	32	109	164	192	89	66	72	199
RHCE	0	0	0	0	0	0	0	2	0	0	0	0	0	1	0	0	0	0
TMEM57	36	60	36	16	102	76	20	36	25	24	14	32	48	51	18	14	27	54
LDLRAP1	13	58	15	11	69	37	11	20	27	26	4	6	22	13	13	4	9	73
MAN1C1	21	37	24	13	84	48	22	49	37	26	0	4	29	16	8	5	13	10
SEPN1	34	58	32	7	79	60	22	34	39	24	3	14	33	20	9	12	13	47
MTFR1L	26	43	26	12	63	41	16	18	20	16	9	20	43	36	12	8	16	44
LOC646471	3	5	3	0	9	2	2	1	2	1	0	4	3	2	1	2	1	2
AUNIP	0	1	0	0	2	1	0	0	1	0	0	0	1	0	0	0	1	3
PAQR7	13	9	5	5	13	15	4	7	10	3	0	2	7	3	0	1	4	7
STMN1	17	62	14	15	113	76	16	23	47	22	5	10	28	17	6	9	8	19
MIR3917	0	0	0	0	0	0	0	0	0	0	0	0	0	0	0	0	0	0
PAFAH2	16	24	9	20	31	35	12	19	17	9	8	13	30	13	4	5	3	45
EXTL1	0	2	0	0	0	0	0	0	0	0	0	0	0	0	0	0	0	0
SLC30A2	0	0	0	0	0	0	0	0	0	0	0	0	0	0	0	0	0	0
TRIM63	0	0	0	0	0	0	0	0	0	0	0	0	0	0	0	0	0	0
PDIK1L	13	40	15	13	63	46	12	18	13	13	3	2	24	12	4	7	9	27
FAM110D	0	0	0	0	0	0	0	0	0	0	0	0	0	0	0	0	0	0
ZNF593	10	8	10	10	35	19	11	8	11	3	1	0	11	3	1	1	2	7
CNKSR1	0	1	0	1	13	5	2	1	0	0	0	0	0	0	0	0	0	2
CATSPER4	0	0	0	0	0	0	0	0	0	0	0	0	0	0	0	0	0	0
CEP85	24	40	21	16	85	57	13	31	22	12	2	13	35	21	9	6	11	26
SH3BGRL3	218	285	114	78	480	273	128	256	199	125	35	178	232	127	95	37	95	265
UBXN11	9	18	4	1	32	17	7	7	14	6	2	8	16	6	13	2	3	25
CD52	18	129	11	40	170	61	15	59	66	28	10	15	64	28	9	15	20	62
AIM1L	0	0	0	0	0	0	0	0	1	0	0	0	0	0	0	0	0	0
ZNF683	2	0	0	4	0	1	0	0	3	1	0	0	4	0	0	0	0	1
LIN28A	0	0	0	0	0	0	0	0	0	0	0	0	0	0	0	0	0	0
DHDDS	21	25	22	14	83	63	26	32	24	14	14	23	40	20	8	9	13	43
HMGN2	114	196	92	74	535	273	93	164	147	82	31	47	151	140	41	29	60	113
RPS6KA1	126	170	74	95	307	221	70	129	69	83	22	127	175	119	63	54	58	172
MIR1976	0	0	0	0	0	0	0	0	0	0	0	0	0	0	0	0	0	0
ARID1A	192	282	190	163	624	434	145	267	220	152	69	125	249	231	111	91	102	280
PIGV	7	12	5	3	28	17	3	10	7	8	4	5	6	13	4	1	2	7
ZDHHC18	68	99	63	76	234	206	72	112	51	50	7	31	86	93	19	37	33	55
SFN	0	0	0	0	0	0	0	1	0	0	0	0	0	0	0	0	0	0
GPN2	15	20	11	14	47	20	4	23	14	8	2	7	11	8	1	3	5	24
GPATCH3	27	26	16	14	49	45	21	33	24	21	7	17	14	21	4	6	16	43
NR0B2	0	0	0	0	0	0	0	0	0	0	0	0	0	0	0	0	0	0
NUDC	103	73	68	50	279	182	73	103	90	35	15	21	60	31	14	19	33	55
C1orf172	0	0	0	0	0	1	0	1	0	0	0	0	0	1	1	0	0	0
TRNP1	0	1	0	0	0	0	0	0	0	0	0	1	0	0	0	0	0	0
FAM46B	0	0	0	0	0	0	0	0	0	0	0	0	1	0	0	0	0	0
SLC9A1	16	21	23	14	58	40	10	42	13	14	7	27	39	24	17	9	15	25
WDTC1	49	126	48	43	139	143	38	80	82	46	36	72	123	82	37	31	33	133
TMEM222	18	38	18	15	92	42	11	30	21	7	8	25	19	20	13	7	13	23
LOC644961	4	6	5	3	12	14	3	10	1	6	2	5	9	5	7	4	4	14
SYTL1	4	29	1	17	40	46	6	18	11	9	5	14	32	6	3	5	11	51
MAP3K6	0	10	0	2	8	2	3	2	4	1	0	1	2	5	1	1	0	1
FCN3	0	0	0	0	0	0	0	0	0	0	0	0	0	0	0	0	0	0
CD164L2	0	0	0	0	0	0	0	0	0	0	0	0	0	0	0	0	0	0
GPR3	1	0	0	0	0	0	0	0	0	0	0	0	0	0	0	0	0	0
WASF2	164	341	158	101	570	386	139	263	176	107	67	149	232	174	108	97	122	336
AHDC1	15	32	13	12	36	38	16	17	9	9	6	15	24	20	8	7	5	28
FGR	163	178	61	53	134	143	74	103	54	40	45	182	102	126	94	58	91	181
IFI6	24	69	14	14	383	56	42	36	59	11	67	15	29	34	6	22	17	105
FAM76A	10	26	14	6	40	39	9	21	9	8	5	10	11	14	6	2	5	15
STX12	55	88	34	10	150	85	43	50	23	23	12	29	47	42	25	32	21	52
PPP1R8	49	70	45	30	187	134	53	68	46	28	20	18	52	51	21	25	25	55
SCARNA1	0	0	0	0	0	0	2	0	0	0	0	0	0	0	1	0	0	0
THEMIS2	145	255	61	75	114	113	98	138	72	28	37	198	167	151	96	44	62	394
RPA2	63	92	53	33	206	156	48	73	65	39	11	47	64	59	24	23	26	70
SMPDL3B	0	0	0	0	0	0	0	0	0	0	0	1	0	1	0	0	0	2
XKR8	6	9	8	4	23	26	10	14	3	4	1	8	17	12	3	2	5	15
EYA3	71	113	67	25	165	98	41	47	49	28	20	63	92	85	32	31	53	98
PTAFR	359	369	146	56	254	196	145	225	115	84	50	322	257	382	134	141	183	349
DNAJC8	92	147	79	52	343	233	93	122	97	47	28	44	120	87	37	37	51	105
ATPIF1	33	60	25	26	145	89	26	49	44	22	3	28	57	30	18	6	22	45
SESN2	16	34	10	18	50	32	10	13	9	8	12	44	25	29	15	16	12	19
MED18	6	18	10	12	34	29	7	16	20	6	6	7	14	13	4	10	7	21
PHACTR4	33	73	38	19	157	92	27	39	33	26	13	38	52	55	21	24	20	71
SNHG3	120	198	90	47	401	236	67	104	140	77	17	22	106	55	17	21	58	56
RCC1	68	95	48	31	243	130	46	61	58	33	7	18	37	25	16	17	8	17
TRNAU1AP	23	49	14	15	51	38	17	32	10	9	7	15	23	21	6	7	14	14
SNHG12	20	67	20	9	105	41	17	34	31	9	4	8	29	21	7	9	9	22
SNORD99	0	0	0	0	0	1	0	0	0	0	0	1	0	0	0	0	0	0
SNORA61	2	0	0	1	0	0	1	0	1	1	0	0	0	0	0	0	0	0
SNORA44	0	0	1	0	6	0	0	0	0	1	0	0	0	0	2	2	0	0
SNORA16A	0	0	0	1	2	0	0	2	0	0	0	0	0	1	0	1	0	1
RAB42	0	1	0	0	0	1	0	0	0	0	0	0	0	1	0	0	0	0
TAF12	21	32	6	10	54	36	11	23	22	7	9	12	16	19	6	4	12	25
RNU11	0	0	2	0	1	0	1	0	0	0	0	0	2	1	0	0	0	0
GMEB1	22	48	28	17	101	69	23	30	28	17	9	22	28	26	13	14	18	28
YTHDF2	52	102	44	40	219	165	46	73	48	35	14	22	63	60	32	23	20	69
OPRD1	0	0	0	0	0	0	0	0	0	0	0	0	0	0	0	0	0	0
EPB41	144	431	121	179	647	493	118	267	180	229	58	108	294	256	120	80	105	526
TMEM200B	0	1	0	1	3	6	2	3	0	0	1	2	4	1	1	0	1	2
SRSF4	136	185	121	91	448	329	103	168	136	88	43	112	183	145	46	56	60	175
MECR	3	6	0	5	23	14	3	2	7	3	1	0	5	1	0	2	0	2
PTPRU	0	0	0	0	0	0	0	0	0	0	0	0	0	1	0	0	0	2
MATN1	3	1	1	0	2	1	1	1	0	2	1	2	0	2	0	1	0	0
MATN1-AS1	1	4	1	0	10	5	1	2	1	1	0	0	6	1	0	0	0	8
LAPTM5	744	1895	523	233	1248	953	366	777	406	340	315	1009	821	767	588	241	388	1628
MIR4420	0	0	0	0	0	0	0	0	0	0	0	0	1	0	0	0	0	0
SDC3	25	14	0	2	16	27	15	42	28	6	1	2	14	16	0	2	0	19
PUM1	107	222	96	60	332	246	85	125	92	60	44	86	131	99	57	66	58	195
SNORD103B	0	0	0	0	0	0	0	0	0	0	0	0	0	0	0	0	0	0
SNORD103A	0	0	0	0	0	0	0	0	0	0	0	0	0	0	0	0	0	0
SNORD85	0	0	0	0	0	0	0	0	0	0	0	0	0	0	0	0	0	0
NKAIN1	0	0	0	0	0	0	0	0	0	0	0	0	1	0	0	0	0	0
SNRNP40	30	63	31	12	159	112	34	45	44	33	4	17	35	25	7	16	14	49
ZCCHC17	19	38	26	6	64	36	15	15	22	11	3	11	26	15	9	9	8	28
FABP3	1	0	0	0	0	0	0	0	0	1	0	1	0	1	1	0	0	1
SERINC2	3	4	0	1	0	3	1	1	0	4	0	0	0	2	1	0	0	5
LOC149086	0	0	0	0	0	1	0	0	0	0	0	0	0	0	0	0	0	0
LOC284551	0	0	0	0	2	2	0	0	0	0	0	0	0	0	0	0	0	1
TINAGL1	0	0	0	0	0	0	1	0	0	0	0	0	0	0	0	0	0	0
HCRTR1	1	0	0	0	0	2	0	0	0	0	0	0	0	0	0	1	0	0
PEF1	27	62	33	30	96	74	25	37	32	12	11	25	46	33	11	19	21	31
COL16A1	0	0	0	0	0	1	0	0	0	0	0	0	0	0	0	0	0	1
BAI2	0	0	0	1	0	0	0	0	0	0	0	1	0	0	0	0	0	1
MIR4254	0	0	0	0	0	0	0	0	0	0	0	0	0	0	0	0	0	0
SPOCD1	0	0	0	0	0	2	0	0	0	0	0	0	0	0	0	0	0	0
PTP4A2	186	489	202	169	829	595	176	298	204	152	81	246	279	298	116	124	127	334
KHDRBS1	174	298	146	90	568	429	132	206	134	98	41	101	147	186	71	67	71	185
TMEM39B	7	8	12	5	34	18	6	9	10	10	8	6	9	4	4	1	5	12
KPNA6	114	189	134	93	454	338	107	150	132	97	37	80	152	127	55	54	66	161
TXLNA	131	181	94	102	454	304	97	173	119	63	29	98	166	115	59	51	75	144
CCDC28B	2	3	4	2	18	16	3	2	4	3	0	0	3	1	2	2	0	2
IQCC	1	2	0	0	6	2	0	1	3	0	0	0	3	0	1	2	1	0
DCDC2B	0	0	0	0	0	1	0	0	0	1	0	0	1	0	0	0	0	0
TMEM234	10	12	9	5	13	10	7	3	8	5	3	6	7	9	5	3	3	12
EIF3I	124	162	103	68	476	243	82	145	143	67	20	41	100	84	26	26	36	68
MTMR9LP	3	5	2	2	1	2	2	0	1	0	0	0	2	0	0	0	0	3
FAM167B	0	0	0	0	0	0	0	0	0	1	0	0	0	0	1	0	0	0
LCK	134	231	122	142	537	332	110	214	186	125	19	30	163	126	44	27	69	169
HDAC1	155	309	139	104	560	422	136	222	151	101	31	73	196	175	55	51	62	149
MARCKSL1	48	92	29	32	112	112	49	56	51	45	8	43	67	35	38	16	50	143
FAM229A	1	1	3	1	3	0	0	0	1	0	0	3	1	0	0	1	0	2
TSSK3	2	0	0	0	0	1	0	1	0	1	0	0	1	0	0	0	0	0
BSDC1	45	111	46	34	173	129	33	61	54	35	25	56	64	61	27	23	34	96
ZBTB8B	0	0	0	0	0	0	0	0	0	0	0	0	0	0	0	0	0	0
ZBTB8A	1	1	0	0	3	1	0	3	0	1	0	1	0	2	1	0	1	0
ZBTB8OS	22	36	10	7	45	27	6	13	18	9	8	8	15	10	2	8	6	21
RBBP4	128	276	176	113	571	382	127	165	126	79	44	72	196	147	56	70	84	263
SYNC	13	6	5	2	26	15	5	12	9	7	3	3	17	9	0	3	2	4
KIAA1522	14	13	6	0	23	12	3	10	11	8	2	2	3	5	1	2	3	7
YARS	145	199	153	91	561	335	87	155	117	95	45	49	140	126	52	54	61	106
S100PBP	22	82	23	25	79	54	26	27	22	15	16	17	54	28	13	15	13	47
FNDC5	0	0	0	0	4	0	0	0	0	0	0	0	0	0	0	0	0	0
HPCA	0	0	0	0	0	0	0	0	0	0	0	0	0	0	1	0	1	0
TMEM54	1	0	1	0	1	1	0	1	0	1	0	0	0	0	0	0	0	0
RNF19B	297	251	155	42	488	219	148	231	124	53	54	220	171	418	68	146	154	214
AK2	110	164	101	55	400	201	75	124	80	55	28	41	107	89	23	34	37	76
ADC	2	3	1	0	1	3	0	2	3	0	1	0	0	1	1	0	0	1
TRIM62	8	16	12	3	35	31	10	22	13	4	11	11	12	17	8	9	11	33
ZNF362	1	12	4	6	35	18	3	18	7	5	3	7	15	5	0	3	8	13
PHC2	70	126	37	17	106	48	20	33	22	26	15	111	51	84	46	25	26	140
MIR3605	0	0	0	0	0	0	0	0	0	0	0	0	0	0	0	0	0	0
ZSCAN20	3	6	2	3	20	2	3	4	3	4	1	1	4	11	1	0	1	5
CSMD2	0	0	0	0	0	0	0	0	0	0	0	0	0	0	0	0	0	0
HMGB4	0	0	0	0	0	0	0	0	0	0	0	0	0	0	0	0	0	0
LOC402779	0	0	0	0	0	0	0	0	0	0	0	0	0	0	0	0	0	0
C1orf94	0	0	0	0	0	0	0	0	0	0	0	0	0	0	0	0	0	0
GJB5	0	0	0	0	0	0	0	0	0	0	0	0	0	0	0	0	0	0
GJB4	0	0	0	0	0	0	0	0	0	0	0	0	0	0	0	0	0	0
GJB3	0	0	0	0	0	0	0	0	0	0	0	0	0	0	0	0	0	0
GJA4	0	0	0	0	0	0	0	2	0	0	0	0	0	0	0	0	0	0
SMIM12	74	108	49	33	205	155	55	79	59	48	15	53	67	72	21	32	40	83
DLGAP3	1	3	1	0	5	2	0	1	0	0	1	0	2	2	0	0	0	2
LOC653160	4	10	1	3	2	1	0	3	2	1	2	2	3	3	1	1	4	3
ZMYM6NB	18	25	7	9	30	22	7	12	8	7	1	6	18	8	6	4	4	20
ZMYM6	24	101	34	21	133	63	27	41	25	24	15	31	56	47	23	13	19	69
ZMYM1	1	26	6	3	20	16	4	8	2	2	4	8	10	15	9	3	2	24
SFPQ	428	537	416	233	1531	1068	358	554	382	304	86	263	454	368	147	157	221	369
ZMYM4	41	96	43	40	144	84	44	59	25	29	11	30	66	52	24	21	30	56
KIAA0319L	33	81	32	30	145	92	34	56	46	26	13	23	82	105	19	19	23	89
NCDN	22	36	18	16	112	54	34	46	27	24	9	5	53	68	14	11	16	27
TFAP2E	1	3	3	1	2	2	1	1	0	0	0	0	3	1	1	1	2	2
PSMB2	76	94	57	54	335	195	69	99	61	61	19	32	80	67	21	25	47	67
C1orf216	32	25	32	16	99	60	21	38	24	18	1	10	26	17	7	12	11	6
CLSPN	6	16	4	10	63	26	8	30	26	18	2	0	12	5	0	3	4	4
AGO4	61	140	46	56	137	104	30	85	48	31	25	85	117	117	39	28	39	166
AGO1	72	133	51	47	239	184	52	96	79	49	22	55	97	60	44	30	36	150
AGO3	34	61	42	20	96	81	24	30	21	17	10	33	42	37	21	19	16	57
TEKT2	0	0	0	0	0	0	0	0	0	0	0	0	0	0	0	0	0	0
ADPRHL2	25	35	27	16	71	50	12	34	24	11	8	22	26	24	7	15	16	27
COL8A2	1	2	0	1	0	0	0	0	1	0	0	0	0	1	0	0	0	3
TRAPPC3	40	56	17	18	122	69	39	34	34	22	14	28	54	28	7	13	17	57
MAP7D1	188	191	122	97	377	312	113	206	162	102	26	156	209	132	103	58	109	276
THRAP3	259	452	240	148	979	613	225	337	255	164	88	190	281	247	102	126	108	352
SH3D21	3	15	4	2	13	3	0	4	3	6	3	73	6	12	8	10	7	8
EVA1B	7	2	5	2	6	2	3	5	1	2	0	11	8	3	2	2	3	8
STK40	126	143	81	46	240	171	79	104	71	46	31	94	142	132	44	60	52	190
LSM10	22	30	13	16	71	37	13	19	20	14	8	10	26	11	6	6	6	22
OSCP1	1	0	0	0	2	0	0	0	1	0	0	0	0	0	0	0	1	1
MRPS15	28	29	18	13	95	53	22	31	30	16	3	1	35	20	5	3	4	16
CSF3R	7	15	0	0	1	0	1	1	5	1	8	16	0	3	4	1	1	16
GRIK3	0	0	0	0	0	0	0	0	0	0	0	0	0	0	0	0	0	0
MIR4255	0	0	0	0	0	0	0	0	0	0	0	0	0	0	0	0	0	0
LOC728431	1	1	1	1	3	4	2	3	2	2	1	3	6	8	2	2	3	11
ZC3H12A	162	132	156	59	341	172	84	153	68	63	48	155	124	216	41	112	108	72
MEAF6	55	73	47	37	128	77	33	51	32	29	9	25	54	42	30	17	15	63
MIR5581	0	0	0	0	0	0	0	0	0	0	0	0	0	0	0	0	0	0
SNIP1	36	62	35	17	117	89	27	54	35	30	14	17	45	38	18	17	22	58
DNALI1	0	0	0	0	0	1	0	0	0	0	0	0	0	0	1	0	0	0
GNL2	58	48	41	36	197	110	29	73	39	26	16	27	49	33	13	15	20	59
RSPO1	0	0	0	0	0	0	0	0	0	0	0	0	0	0	0	0	0	0
C1orf109	9	13	9	3	50	25	16	11	10	10	5	1	13	3	3	3	3	8
CDCA8	2	2	0	2	7	9	1	8	5	1	0	0	3	1	1	1	2	1
EPHA10	0	1	0	0	0	0	0	0	0	0	0	0	0	0	0	1	0	0
MANEAL	3	1	3	4	4	9	2	3	0	2	2	0	2	2	1	5	1	2
YRDC	48	32	29	25	119	79	33	49	35	20	4	22	40	33	9	22	11	23
C1orf122	49	45	30	14	72	43	15	28	28	21	10	100	48	65	23	28	32	43
MTF1	246	258	154	47	467	263	107	210	122	85	43	280	201	320	148	128	155	235
INPP5B	24	46	32	25	65	75	35	36	24	24	13	18	43	37	15	19	17	54
SF3A3	91	119	91	56	421	224	72	128	108	50	27	26	94	66	27	37	29	68
FHL3	12	8	8	7	23	30	3	13	9	4	9	9	13	6	16	5	14	19
UTP11L	38	42	25	19	135	63	18	28	28	15	10	7	22	25	7	3	13	24
POU3F1	0	0	0	3	0	1	1	3	0	1	0	0	1	1	1	2	1	0
MIR3659	0	0	0	0	0	0	0	0	0	0	0	0	0	0	0	0	0	0
LOC339442	0	0	0	0	0	0	0	0	0	0	0	0	0	0	0	0	0	0
RRAGC	91	96	55	40	141	164	56	92	45	36	23	51	55	74	30	43	37	78
GJA9-MYCBP	0	0	0	0	0	0	0	0	0	0	0	0	0	0	0	0	0	0
MYCBP	0	7	3	0	12	5	0	0	2	1	0	0	1	3	0	0	2	2
GJA9	0	0	0	0	0	0	0	0	0	0	0	0	0	0	0	0	0	0
RHBDL2	0	0	0	1	0	0	0	0	0	0	0	0	0	0	0	0	0	1
AKIRIN1	86	194	86	57	305	242	65	137	63	64	35	77	121	120	33	43	51	140
NDUFS5	67	73	53	20	206	116	32	95	72	36	11	11	48	52	22	12	16	44
MACF1	505	994	398	451	1622	1351	489	735	571	439	189	597	772	633	375	358	381	1518
KIAA0754	18	29	15	12	80	50	21	28	20	8	7	15	35	29	13	11	12	38
BMP8A	2	4	0	2	1	0	0	2	0	0	0	3	2	0	1	0	0	9
PPIEL	8	20	10	3	51	8	11	11	6	5	1	7	16	7	6	1	7	30
PABPC4	264	487	191	123	990	536	174	350	200	190	54	162	237	178	133	68	111	286
SNORA55	0	0	0	0	1	0	0	0	0	0	0	0	0	0	0	0	0	0
HEYL	0	0	0	0	0	0	0	0	0	0	0	0	0	0	0	0	0	1
NT5C1A	0	0	0	0	0	0	0	0	0	0	0	0	0	1	0	0	0	0
HPCAL4	1	6	1	3	5	9	1	6	4	4	0	0	3	1	0	2	1	5
PPIE	14	48	20	6	104	66	14	35	32	19	9	9	27	18	13	9	11	47
BMP8B	2	1	0	2	0	2	2	2	0	0	0	1	1	0	0	0	0	2
OXCT2	0	1	0	0	1	0	0	0	1	0	0	0	0	0	0	0	0	0
TRIT1	6	22	13	10	25	35	9	8	15	10	2	3	14	7	2	3	6	14
MYCL1	0	3	0	0	0	0	0	0	0	0	0	0	1	0	1	0	0	7
MFSD2A	19	4	29	5	56	18	9	18	4	6	1	12	10	16	4	20	9	7
CAP1	494	633	333	210	1404	868	372	548	349	277	104	319	428	481	225	204	233	639
PPT1	84	104	76	38	313	186	81	91	73	54	12	58	82	65	31	23	29	88
RLF	52	159	81	25	225	134	46	93	48	47	27	153	88	149	48	58	53	106
TMCO2	0	0	0	0	0	0	0	0	0	0	0	0	0	0	0	0	0	0
ZMPSTE24	61	128	58	28	205	129	46	68	36	36	18	37	49	71	29	26	28	62
COL9A2	7	5	5	0	11	5	0	6	2	1	1	2	7	2	3	0	0	10
SMAP2	434	757	204	137	717	605	174	348	258	168	73	100	286	288	217	105	111	893
ZFP69B	2	15	2	3	16	10	3	3	8	4	1	1	8	5	3	2	5	6
ZFP69	3	9	3	0	7	8	6	6	2	3	0	3	2	1	1	1	3	5
EXO5	6	11	8	9	35	24	7	11	6	5	5	2	28	9	5	3	3	14
ZNF684	3	4	8	2	10	9	3	4	4	1	1	2	8	4	0	1	3	8
RIMS3	3	6	2	3	26	22	2	8	5	4	0	1	17	12	0	3	6	6
LOC100130557	2	9	2	2	28	14	4	10	6	6	2	1	7	9	5	1	4	13
NFYC	41	64	37	18	124	74	28	37	30	24	4	23	32	37	20	14	21	41
MIR30E	0	0	0	0	0	0	0	0	0	0	0	0	0	0	0	0	0	0
MIR30C1	0	0	0	0	0	0	0	0	0	0	0	0	0	0	0	0	0	0
KCNQ4	2	0	3	0	5	2	0	1	0	1	2	3	3	1	0	0	1	0
CITED4	3	4	2	0	8	3	1	9	2	3	0	5	2	2	2	1	0	3
CTPS1	54	40	28	28	232	112	41	50	49	34	10	9	40	27	15	9	17	20
SLFNL1-AS1	7	9	6	4	17	15	6	3	8	6	1	0	10	4	3	1	2	10
SLFNL1	1	0	0	2	4	0	0	0	0	0	0	0	1	1	1	0	0	1
SCMH1	7	27	13	9	33	36	14	18	10	13	4	5	20	10	7	1	1	18
EDN2	0	0	0	0	0	0	0	0	0	0	0	0	0	0	0	0	0	0
HIVEP3	110	36	55	34	143	112	65	95	82	38	13	21	104	36	21	32	53	44
GUCA2B	0	0	0	0	0	0	0	0	0	0	0	0	0	0	0	0	0	0
GUCA2A	0	0	0	0	0	0	0	0	0	0	0	0	0	0	0	0	0	0
FOXJ3	65	182	77	48	317	225	65	113	73	67	43	55	114	96	62	31	54	171
RIMKLA	0	0	0	2	1	1	0	1	0	0	0	0	0	0	0	0	0	0
ZMYND12	0	0	0	0	0	0	0	0	0	0	0	0	0	0	0	0	0	0
PPCS	27	54	23	10	84	68	12	30	23	27	12	14	38	32	19	10	14	58
CCDC30	0	0	0	0	8	1	0	2	0	0	0	0	2	0	1	0	0	4
PPIH	29	35	16	14	120	66	27	22	37	15	3	9	24	14	3	6	6	16
YBX1	564	642	462	241	1726	990	393	535	406	307	99	194	403	289	133	143	222	343
CLDN19	0	0	0	0	0	0	0	0	0	0	0	0	0	0	0	0	0	0
LEPRE1	31	26	13	14	69	53	10	30	17	21	7	20	26	32	12	6	10	40
C1orf50	5	18	4	2	20	10	2	9	10	3	2	3	10	7	0	0	4	10
LOC100129924	0	0	0	0	0	0	1	0	0	0	0	0	1	0	0	0	1	1
CCDC23	8	11	2	3	27	16	9	14	8	10	0	12	11	8	5	4	1	12
ERMAP	6	6	3	2	15	15	4	1	5	8	0	3	5	5	7	1	6	19
ZNF691	9	10	4	4	13	7	4	4	6	4	0	5	5	7	0	2	4	6
SLC2A1	26	81	40	34	112	88	30	39	20	25	18	138	30	62	18	24	18	30
SLC2A1-AS1	0	0	0	0	0	0	0	0	0	0	0	0	0	0	0	0	0	0
FAM183A	0	0	0	0	0	0	0	0	0	0	0	0	0	0	0	0	0	0
EBNA1BP2	54	67	57	36	260	138	46	64	76	30	5	5	29	23	11	14	11	19
WDR65	0	1	0	0	3	1	0	0	2	2	0	0	1	0	0	0	0	0
TMEM125	0	0	0	0	0	0	0	0	0	0	0	0	0	0	0	0	0	0
C1orf210	0	0	0	0	0	0	0	0	0	0	0	0	0	0	0	0	0	0
TIE1	0	0	0	0	1	4	2	0	0	3	0	1	5	3	1	0	2	2
MPL	0	0	1	0	0	0	0	1	0	0	0	0	2	0	0	0	0	0
CDC20	3	2	3	6	20	9	1	8	7	4	0	0	1	1	0	0	1	0
ELOVL1	74	99	40	35	162	112	45	73	54	19	17	62	69	52	27	21	35	74
MED8	33	38	24	12	86	57	16	33	19	21	2	20	36	27	11	9	12	42
SZT2	101	179	80	70	271	198	67	113	91	62	44	87	151	110	41	43	57	194
HYI	3	8	0	2	5	4	2	3	6	1	3	0	6	4	4	1	0	2
PTPRF	5	4	1	0	1	6	2	2	6	0	0	1	2	4	0	1	3	1
KDM4A	39	74	41	38	136	118	50	47	55	30	15	39	75	41	31	20	28	81
KDM4A-AS1	0	2	1	1	0	2	0	0	1	1	2	1	0	0	0	0	1	0
ST3GAL3	1	9	6	7	24	13	4	3	3	4	0	1	8	4	0	7	5	5
ARTN	0	0	0	0	0	0	0	0	0	0	0	0	0	0	0	0	0	1
IPO13	19	36	19	11	78	35	5	21	20	4	8	16	21	14	3	7	14	21
DPH2	42	24	58	30	121	68	20	44	43	15	4	7	25	13	1	10	7	25
ATP6V0B	108	123	88	35	204	108	51	116	60	43	29	108	101	112	59	46	55	162
B4GALT2	3	5	2	5	25	8	2	7	2	2	0	1	1	4	1	2	4	0
CCDC24	1	2	3	0	1	0	1	2	1	1	0	1	1	2	0	0	2	2
SLC6A9	7	3	4	0	22	8	2	4	7	1	1	1	2	0	0	2	0	0
KLF17	0	0	0	0	0	0	0	0	0	0	0	0	0	0	0	0	0	0
DMAP1	44	42	28	23	84	50	25	39	35	17	10	14	43	21	17	8	21	39
ERI3	13	19	8	7	54	36	10	26	20	8	1	6	10	11	3	4	2	17
RNF220	46	81	40	34	168	122	27	61	53	48	18	32	89	45	21	13	29	70
MIR5584	0	0	0	0	0	0	0	0	0	0	0	0	0	0	0	0	0	0
TMEM53	0	1	2	0	1	2	0	0	1	0	0	0	2	1	0	0	1	1
C1orf228	11	17	12	3	35	10	6	14	19	11	1	0	5	6	5	1	8	6
KIF2C	2	4	0	0	11	3	1	5	0	0	2	1	2	1	0	0	2	4
RPS8	623	1718	584	360	2479	1532	402	893	794	533	128	184	687	607	176	149	247	569
SNORD55	0	0	0	0	2	0	0	0	0	0	0	0	0	0	0	0	1	0
SNORD46	0	0	1	0	6	1	0	1	0	0	0	1	0	1	0	0	2	1
SNORD38A	0	0	0	0	1	2	1	0	1	0	0	0	0	0	0	0	0	0
SNORD38B	0	0	0	0	2	0	0	0	0	1	0	0	0	0	0	0	0	1
BEST4	0	0	0	0	1	0	0	0	0	0	0	0	0	1	0	0	1	0
PLK3	93	92	60	26	145	61	35	80	46	39	23	120	80	97	38	39	48	61
TCTEX1D4	2	1	2	0	2	0	0	1	0	0	0	0	1	0	0	0	0	0
BTBD19	4	5	8	3	8	5	2	8	1	4	0	9	6	3	5	3	2	8
PTCH2	0	2	2	0	1	3	0	0	1	0	0	1	0	0	0	0	0	2
EIF2B3	12	21	22	8	79	41	18	16	14	12	1	4	16	5	6	3	2	7
HECTD3	37	66	30	17	95	91	31	56	29	19	13	44	55	42	16	19	26	57
UROD	22	29	19	10	69	39	12	24	22	12	7	13	16	15	10	6	10	21
ZSWIM5	0	0	1	0	10	3	0	0	2	0	0	0	4	6	2	0	0	6
LOC400752	0	1	0	0	2	0	1	1	0	0	0	0	1	0	0	0	0	0
HPDL	3	5	3	1	6	2	1	1	1	0	0	0	1	1	0	0	1	1
MUTYH	13	22	6	10	58	30	4	7	15	9	4	4	14	6	2	2	6	17
TOE1	14	16	13	11	58	36	11	18	10	7	8	8	12	12	7	6	10	14
TESK2	7	25	4	7	20	19	3	8	8	2	4	11	14	16	1	2	2	14
CCDC163P	0	13	6	0	3	4	2	6	2	6	2	2	2	0	3	3	2	4
MMACHC	6	7	7	1	13	6	4	3	3	1	1	1	7	0	0	0	1	1
PRDX1	344	327	281	141	1123	701	313	425	395	181	44	138	323	276	94	86	148	282
AKR1A1	52	65	18	20	99	96	46	62	53	38	11	20	52	25	16	20	27	69
NASP	127	215	102	71	582	325	96	153	145	69	28	44	106	93	30	31	45	167
CCDC17	2	10	4	2	8	6	1	2	3	3	2	7	3	2	4	0	2	5
GPBP1L1	110	223	83	78	334	240	71	138	70	75	34	85	131	129	76	49	74	196
RPS15AP10	2	9	3	1	10	7	4	3	3	2	1	3	3	5	2	2	0	9
TMEM69	7	20	11	8	48	40	14	13	20	16	1	10	11	16	5	2	9	19
IPP	6	20	8	13	53	30	7	11	14	5	3	2	15	5	8	3	5	16
MAST2	25	11	16	21	69	60	15	25	22	17	8	30	20	23	16	14	12	30
PIK3R3	3	4	2	4	14	17	3	5	3	1	0	3	7	6	1	3	7	2
TSPAN1	0	1	0	0	0	0	1	0	0	0	0	0	0	0	0	0	0	0
POMGNT1	29	26	21	26	99	74	29	35	21	13	8	11	39	40	6	11	12	26
LURAP1	2	1	0	0	2	0	0	0	2	0	0	0	1	0	0	0	0	0
RAD54L	4	0	1	5	9	5	4	3	5	1	0	1	3	0	0	1	1	2
LRRC41	32	55	36	13	97	91	18	27	30	22	15	17	45	28	7	10	13	39
UQCRH	70	143	56	37	234	148	34	77	80	43	15	15	62	61	13	23	21	54
NSUN4	34	60	20	11	122	63	29	42	27	23	9	14	35	22	5	15	15	37
FAAH	7	11	7	3	5	4	3	6	2	2	1	1	5	16	5	0	2	3
LOC729041	0	0	0	0	0	1	0	0	0	0	0	0	0	0	0	0	0	0
DMBX1	0	0	0	0	0	0	0	0	0	0	0	0	0	0	0	0	0	0
MKNK1-AS1	0	0	1	0	0	1	0	0	0	0	1	1	0	1	1	0	0	1
KNCN	0	0	0	0	0	0	0	0	0	0	0	0	0	0	0	0	0	0
MKNK1	63	76	33	19	103	69	36	56	34	21	7	36	84	62	33	11	24	106
MOB3C	57	61	29	22	83	94	52	67	36	19	15	20	67	52	33	28	18	80
ATPAF1	19	28	10	15	87	41	14	26	20	10	1	7	21	14	4	5	4	16
TEX38	0	0	0	0	2	0	0	0	0	0	0	0	0	0	0	0	0	0
EFCAB14-AS1	0	1	0	1	3	0	0	2	0	0	0	1	0	0	0	0	1	0
EFCAB14	117	235	98	77	408	310	103	168	85	91	53	81	182	119	62	56	55	213
CYP4B1	0	0	0	0	0	0	0	0	0	0	0	0	0	0	0	0	0	0
CYP4Z2P	0	0	0	0	0	0	0	0	0	0	0	0	0	0	0	0	0	0
CYP4A11	0	0	0	0	0	0	0	0	0	0	0	0	0	0	0	0	0	0
CYP4X1	0	0	0	0	0	0	0	0	0	0	0	0	0	0	0	0	0	0
CYP4Z1	0	0	0	0	0	0	0	0	0	0	0	0	0	0	0	0	0	0
CYP4A22	0	0	0	0	0	0	0	0	0	0	0	0	0	0	0	0	0	0
LINC00853	0	0	0	0	0	0	0	0	0	0	0	0	0	0	0	0	1	0
PDZK1IP1	0	0	0	0	0	0	0	0	0	0	0	0	0	1	0	0	1	0
TAL1	2	5	3	0	4	2	2	3	1	1	2	5	11	4	1	0	2	2
STIL	4	4	2	6	39	20	2	5	6	9	5	2	3	3	0	0	2	1
CMPK1	120	323	90	92	519	286	101	141	65	85	31	66	143	131	49	48	51	212
FOXE3	0	0	0	0	0	0	0	1	0	0	0	0	0	0	0	0	0	0
FOXD2-AS1	7	3	1	1	5	4	1	3	1	0	2	1	2	3	0	1	1	3
FOXD2	2	1	1	1	2	4	0	1	0	0	0	0	1	0	0	0	0	0
TRABD2B	0	0	0	0	0	0	0	0	0	0	0	0	0	0	0	0	0	0
SKINTL	0	0	0	0	0	0	0	0	0	0	0	0	0	0	0	0	0	0
SLC5A9	0	0	0	0	0	0	0	0	0	0	0	0	0	0	0	0	0	0
SPATA6	1	5	1	1	15	6	0	1	3	4	0	1	2	2	1	1	0	3
AGBL4	0	0	0	0	0	0	0	0	0	0	0	0	0	0	0	0	0	0
BEND5	0	1	1	0	1	1	2	0	2	0	0	0	3	0	0	0	0	3
ELAVL4	0	0	0	2	0	0	0	0	0	0	0	0	0	0	0	0	1	0
DMRTA2	0	0	0	0	0	0	1	0	0	0	0	0	0	0	0	0	0	0
FAF1	19	38	25	16	94	64	21	33	33	21	10	8	41	24	10	9	15	28
CDKN2C	1	4	3	4	4	2	5	3	2	0	1	1	8	4	2	2	5	8
C1orf185	0	0	0	0	0	0	0	0	0	0	0	0	0	0	0	0	0	0
RNF11	43	109	59	21	149	115	40	83	23	50	12	51	75	89	19	19	46	83
TTC39A	1	0	0	0	5	0	1	0	0	0	0	1	0	0	0	1	0	1
EPS15	124	302	111	100	405	331	94	150	91	104	54	86	206	190	59	87	82	237
OSBPL9	54	85	32	18	192	109	41	48	53	29	8	32	59	39	13	28	28	42
NRD1	186	386	228	128	704	458	159	293	207	155	75	143	211	267	125	120	101	346
MIR761	0	0	0	0	0	0	0	0	0	0	0	0	0	0	0	0	0	0
RAB3B	0	3	0	0	1	1	0	1	0	0	0	0	0	0	1	2	0	0
TXNDC12	50	67	32	22	123	93	23	41	33	18	17	25	65	55	19	14	14	60
KTI12	0	0	0	0	0	0	0	0	0	0	0	0	0	0	0	0	0	0
BTF3L4	27	69	36	15	130	85	30	46	18	26	11	26	33	40	17	30	21	70
ZFYVE9	6	23	6	3	9	8	4	12	5	5	0	3	7	7	5	0	0	7
CC2D1B	89	144	68	43	271	165	73	97	86	60	37	71	96	109	32	36	42	128
ORC1	7	10	1	4	41	21	6	10	13	4	2	0	1	2	0	1	1	2
PRPF38A	82	134	72	56	259	187	70	84	60	32	16	28	76	63	27	22	28	96
ZCCHC11	91	300	100	78	350	238	77	130	109	92	46	79	154	150	47	46	63	193
GPX7	11	13	9	9	25	12	7	6	7	4	1	1	8	8	0	4	4	5
FAM159A	1	2	0	3	1	2	1	2	1	2	2	0	4	1	1	2	4	4
SELRC1	11	11	17	8	56	21	13	13	13	4	4	3	11	6	2	14	5	6
ZYG11B	19	65	21	14	91	80	24	32	23	22	7	17	38	27	20	15	15	55
ZYG11A	0	2	1	0	0	2	0	0	0	1	0	0	0	1	0	1	0	0
ECHDC2	8	7	7	7	27	21	2	17	9	8	3	0	11	7	4	0	6	13
SCP2	50	91	31	35	161	118	35	66	48	42	12	10	48	45	16	17	17	72
PODN	0	0	0	1	0	0	0	1	0	0	0	0	0	0	0	0	0	0
SLC1A7	0	1	0	2	0	1	0	0	0	0	1	1	0	0	0	0	0	0
CPT2	17	24	9	5	23	18	8	10	11	3	5	5	17	15	4	6	7	15
C1orf123	14	28	2	8	36	34	17	8	5	10	6	4	14	0	6	2	1	25
MAGOH	110	91	69	61	348	197	77	84	54	32	8	30	51	66	20	25	36	49
LOC100507564	0	0	0	0	0	0	0	0	0	0	1	0	0	0	0	0	0	0
LRP8	67	51	36	31	182	115	40	43	33	31	15	8	39	43	9	16	16	14
SLC25A3P1	0	0	0	0	0	0	0	0	0	0	0	0	0	0	0	0	0	0
DMRTB1	0	0	0	0	0	0	0	0	0	0	0	0	0	0	0	0	0	0
GLIS1	0	0	0	0	0	0	0	0	0	0	0	0	0	0	0	0	0	0
TMEM48	20	42	27	9	122	51	24	35	26	27	9	11	26	16	9	5	6	18
YIPF1	13	27	7	4	41	31	9	15	15	7	8	12	20	14	12	5	5	24
DIO1	0	0	0	0	0	0	0	0	0	1	0	0	0	0	0	0	1	1
HSPB11	20	18	7	11	60	39	12	24	18	11	4	5	18	12	4	4	12	32
LRRC42	12	25	7	9	47	29	8	13	12	11	4	11	10	8	1	2	7	9
LDLRAD1	0	0	0	0	0	0	0	0	0	0	0	0	0	0	0	0	0	0
TMEM59	87	175	55	53	221	179	66	102	60	52	31	88	95	112	52	32	37	159
TCEANC2	15	20	13	9	32	30	9	9	6	6	6	8	20	7	7	6	5	23
MIR4781	0	0	0	0	0	0	0	0	0	0	0	0	0	0	0	0	0	0
CDCP2	0	0	0	0	0	1	0	0	0	0	0	0	0	0	1	0	0	0
CYB5RL	12	9	3	2	12	9	2	5	9	2	4	2	3	2	0	1	1	3
MRPL37	25	28	14	22	107	63	24	46	33	13	8	8	27	17	8	10	11	16
SSBP3	19	44	23	17	83	64	24	39	17	17	5	35	38	43	21	16	24	48
ACOT11	0	2	0	0	0	0	1	1	1	3	0	1	1	0	0	0	0	0
FAM151A	0	0	0	0	0	0	0	0	0	0	0	0	1	0	0	0	0	1
MROH7	0	0	0	0	0	0	0	0	0	0	0	0	0	0	0	0	0	0
HEATR8-TTC4	0	0	0	0	0	0	0	0	0	0	0	0	0	0	0	0	0	0
TTC4	3	4	0	2	23	5	0	6	1	2	0	4	6	3	2	2	0	4
PARS2	6	5	2	1	7	3	1	1	4	1	0	2	2	1	0	2	1	5
TTC22	4	2	0	3	10	4	3	3	5	1	1	0	6	2	1	0	2	6
C1orf177	1	1	0	1	0	0	0	0	0	0	0	0	0	0	0	0	0	0
DHCR24	44	39	37	18	244	116	46	55	72	26	5	14	47	21	3	20	12	8
TMEM61	0	0	0	0	0	0	0	0	0	0	0	0	0	0	0	0	0	0
BSND	0	0	0	0	0	0	0	0	0	0	0	0	0	0	0	0	0	0
PCSK9	0	0	0	0	0	0	0	0	0	0	0	0	0	0	0	0	0	0
USP24	168	399	189	129	630	529	153	230	160	125	69	146	248	190	102	106	93	366
LOC100507634	0	0	0	1	0	2	1	0	0	0	0	1	0	1	0	0	0	0
MIR4422	0	0	0	0	0	0	0	0	0	0	0	0	0	0	0	0	0	0
PPAP2B	1	4	4	0	3	4	0	3	0	0	1	4	1	3	3	4	0	0
PRKAA2	0	0	0	0	0	1	0	0	0	0	0	0	0	0	0	0	0	0
C1orf168	0	0	0	0	0	0	0	0	0	0	0	0	0	0	0	0	0	0
C8A	0	0	0	0	0	0	0	0	0	0	0	0	0	0	0	0	0	0
C8B	0	0	0	0	0	0	0	0	0	0	0	0	0	0	0	0	0	0
DAB1	0	0	0	0	0	0	0	0	0	0	0	0	0	0	0	0	0	0
OMA1	2	33	6	9	41	30	7	14	9	19	4	4	12	2	9	1	2	24
TACSTD2	0	0	0	0	0	0	0	1	0	0	0	1	1	0	0	0	0	1
MYSM1	77	245	65	73	332	263	63	104	57	63	37	60	125	121	30	38	45	182
JUN	98	102	44	38	159	114	48	87	77	43	55	82	80	102	58	61	75	67
LOC100131060	0	0	0	0	2	0	0	0	0	0	0	0	0	0	0	0	0	0
HSD52	0	0	0	0	0	0	0	0	0	0	0	0	0	0	0	0	0	0
FGGY	2	6	5	1	9	9	2	2	4	1	2	1	6	4	4	4	5	2
MIR4711	0	0	0	0	0	0	0	0	0	0	0	0	0	0	0	0	0	0
HOOK1	7	30	11	9	73	53	14	26	14	9	2	2	17	12	3	5	3	12
CYP2J2	0	0	0	0	6	1	0	0	1	0	0	0	0	0	0	1	0	0
C1orf87	0	1	0	0	0	0	0	0	0	0	0	0	0	0	0	0	0	0
NFIA	2	7	3	1	19	6	1	8	0	1	1	1	6	4	0	0	1	6
MGC34796	0	0	0	0	0	0	0	0	0	0	0	0	0	0	0	0	0	0
TM2D1	7	27	8	12	38	24	9	20	13	5	11	11	16	9	5	4	9	18
INADL	20	76	33	11	112	79	29	51	26	30	5	4	37	21	15	13	15	65
L1TD1	3	2	0	0	31	0	3	4	3	1	1	2	0	5	0	0	1	5
KANK4	0	0	0	0	0	0	0	0	0	0	0	0	0	0	0	0	0	0
USP1	66	139	63	46	265	185	65	89	44	53	15	32	71	69	31	27	30	83
DOCK7	11	25	8	5	31	18	14	16	10	6	4	32	6	28	11	14	11	16
ANGPTL3	0	1	0	0	0	0	0	0	0	0	0	0	0	0	0	0	0	0
ATG4C	10	24	10	8	25	19	5	10	8	5	3	6	15	5	6	4	2	11
LINC00466	0	0	0	0	0	0	0	0	0	0	0	0	0	0	0	0	0	0
FOXD3	0	0	0	0	0	0	0	0	0	0	0	0	0	0	0	0	0	0
ALG6	9	49	8	11	43	38	8	17	11	10	7	8	16	24	5	6	1	21
ITGB3BP	4	17	3	9	38	14	4	4	5	7	0	0	13	3	1	1	2	3
EFCAB7	4	7	3	7	26	16	1	6	2	2	2	2	10	3	3	3	2	6
DLEU2L	0	3	0	1	2	3	0	2	0	1	1	0	0	0	1	1	1	3
PGM1	19	43	21	17	76	68	11	27	31	16	7	35	24	29	15	15	16	34
ROR1	2	5	3	0	1	3	0	1	0	0	2	1	3	0	0	0	1	2
UBE2U	0	0	0	0	0	0	0	0	0	0	0	0	0	0	0	0	0	0
CACHD1	0	1	2	0	3	0	0	0	2	3	1	0	0	0	1	0	0	2
MIR4794	0	0	0	0	0	0	0	0	0	0	0	0	0	0	0	0	0	0
RAVER2	3	2	2	1	4	5	3	3	3	0	1	1	1	4	1	0	1	1
JAK1	239	579	230	194	983	775	296	466	234	210	112	288	452	430	192	189	181	696
MIR3671	0	0	0	0	0	0	0	0	0	0	0	0	0	0	0	0	0	0
MIR101-1	0	0	0	0	0	0	0	0	0	0	0	0	0	0	0	0	0	0
AK4	29	47	17	10	104	27	20	32	15	12	8	98	18	62	20	26	29	19
DNAJC6	5	3	2	4	13	6	3	7	2	3	2	4	5	3	0	7	2	1
LEPROT	86	96	27	20	108	114	46	71	19	23	12	74	51	66	31	26	35	161
LEPR	1	7	2	1	7	8	0	8	4	3	0	3	1	4	6	0	0	9
PDE4B	206	368	199	68	630	319	173	247	142	89	74	185	221	488	38	156	194	240
SGIP1	0	0	0	0	0	0	0	0	0	0	0	0	1	0	0	0	0	0
MIR3117	0	0	0	0	0	0	0	0	0	0	0	0	0	0	0	0	0	0
TCTEX1D1	1	0	0	0	0	0	0	0	0	0	0	0	0	0	0	0	0	2
INSL5	0	0	0	0	0	0	0	0	0	0	0	0	0	0	0	0	0	0
WDR78	0	0	0	0	0	0	0	0	1	1	0	0	0	0	0	1	1	0
MIER1	97	227	93	65	341	269	93	128	64	75	42	93	131	141	61	64	47	140
SLC35D1	36	76	27	39	143	116	35	48	46	20	18	22	57	53	19	19	20	51
C1orf141	0	0	0	0	1	0	0	0	0	0	0	0	0	0	0	0	0	0
IL23R	4	1	1	4	20	28	7	5	2	1	0	0	5	22	0	0	2	1
IL12RB2	52	39	46	58	277	385	120	106	139	31	37	6	123	130	2	72	56	47
SERBP1	353	430	341	185	1507	860	295	389	339	193	62	124	293	251	71	92	127	278
GADD45A	22	37	28	3	71	32	9	17	8	16	4	29	18	12	6	6	5	17
GNG12	1	2	0	0	0	2	0	0	0	1	0	2	1	0	1	0	0	0
GNG12-AS1	0	0	0	0	0	0	0	0	0	0	0	0	0	0	0	0	0	0
DIRAS3	0	0	0	0	0	0	0	0	0	0	0	0	0	0	0	0	0	0
WLS	0	5	0	0	0	1	0	0	2	0	0	5	0	0	2	0	1	6
MIR1262	0	0	0	0	0	0	0	0	0	0	0	0	0	0	0	0	0	0
RPE65	0	0	0	0	0	0	0	0	0	0	0	0	0	0	0	0	0	0
DEPDC1	0	1	0	1	3	1	2	0	1	0	0	0	0	1	0	0	0	1
LRRC7	0	0	1	0	0	1	0	0	0	0	0	0	0	0	0	0	0	0
PIN1P1	0	0	0	0	0	0	0	0	0	0	0	0	0	0	0	0	0	0
LRRC40	22	36	19	14	67	64	17	26	20	9	6	5	34	16	9	4	16	29
SRSF11	138	407	156	103	609	411	121	206	125	144	63	128	245	221	83	63	94	404
ANKRD13C	42	70	42	28	135	92	21	52	30	26	16	18	42	44	16	8	19	47
HHLA3	1	7	1	1	3	0	1	0	1	2	1	0	2	3	0	2	3	1
CTH	1	4	2	0	2	2	0	0	0	0	0	2	0	0	0	2	0	0
PTGER3	7	4	8	0	10	3	0	1	0	0	7	3	4	3	3	1	4	6
ZRANB2-AS1	0	1	0	0	0	0	1	0	0	0	0	0	1	4	0	0	0	0
ZRANB2	83	260	121	56	416	237	98	159	66	67	47	54	139	131	35	53	67	144
MIR186	0	0	0	0	0	0	0	0	0	0	0	0	0	0	0	0	0	0
ZRANB2-AS2	0	0	0	0	0	0	0	0	0	0	0	0	0	0	0	0	0	1
NEGR1	0	0	0	0	0	1	0	0	0	0	0	0	0	1	0	0	0	0
NEGR1-IT1	0	0	0	0	0	0	0	0	0	0	0	0	0	0	0	0	0	0
LRRIQ3	0	0	0	0	5	1	0	0	0	0	0	0	2	0	0	0	0	0
FPGT-TNNI3K	0	0	0	0	0	0	0	0	0	0	0	0	0	0	0	0	0	0
FPGT	7	27	3	4	16	20	8	16	2	1	3	3	13	8	2	3	2	15
TNNI3K	0	0	0	0	0	0	0	0	0	0	0	0	0	0	0	0	0	0
C1orf173	0	0	0	2	0	1	0	0	0	0	2	0	1	0	0	0	0	0
CRYZ	16	32	5	21	35	76	20	40	23	15	4	5	17	12	1	9	4	15
TYW3	23	47	34	21	90	68	24	29	24	23	8	6	20	19	8	16	3	27
LHX8	0	0	0	0	0	0	0	0	0	0	0	0	0	0	0	0	0	0
SLC44A5	0	1	0	0	0	0	1	0	0	0	0	0	2	0	0	0	0	0
ACADM	51	96	24	22	139	111	47	42	44	24	15	13	37	23	12	19	13	26
RABGGTB	86	196	98	55	469	231	55	94	102	57	21	28	83	84	24	38	37	75
SNORD45C	0	0	0	0	0	0	0	0	0	0	0	0	0	0	0	0	0	0
SNORD45A	0	0	0	0	0	0	0	0	0	0	0	0	0	0	0	0	0	0
SNORD45B	0	0	0	0	0	0	0	0	0	0	0	0	0	0	0	0	0	0
MSH4	0	1	0	0	0	1	1	0	0	0	0	0	0	0	0	1	0	0
ASB17	0	0	0	0	0	0	0	0	0	0	0	0	0	0	0	0	0	0
ST6GALNAC3	0	5	0	0	4	1	0	1	0	0	0	0	0	0	1	0	0	5
ST6GALNAC5	0	0	0	0	0	0	0	0	0	0	0	0	0	0	0	0	0	0
PIGK	10	44	9	14	79	41	12	32	15	11	4	2	21	16	7	4	2	18
AK5	1	2	0	0	5	3	0	0	1	0	0	1	0	0	0	1	0	4
ZZZ3	39	67	47	30	185	118	31	48	30	22	16	13	55	29	18	14	9	83
USP33	65	158	63	32	212	161	48	114	51	37	29	55	93	89	35	30	37	144
FAM73A	23	66	22	19	100	67	23	31	11	26	9	22	43	26	21	19	12	37
NEXN	1	15	3	8	13	6	2	4	6	5	2	3	5	1	0	2	1	3
FUBP1	212	305	222	144	783	519	171	265	164	131	46	52	214	158	57	85	80	222
DNAJB4	6	7	5	2	26	18	10	9	8	8	2	8	12	5	4	5	2	10
GIPC2	0	0	0	0	0	0	0	0	0	0	0	0	0	0	0	0	0	0
MGC27382	0	0	0	0	0	0	0	0	0	0	0	0	0	0	0	0	0	0
PTGFR	0	0	0	0	0	0	0	0	0	0	0	0	0	0	0	0	0	0
IFI44L	65	341	78	29	1150	125	102	83	157	17	316	56	54	86	4	161	41	130
IFI44	18	105	32	12	298	46	31	45	57	10	118	20	17	30	1	48	11	86
ELTD1	0	0	0	0	0	0	0	0	0	0	0	0	0	0	0	0	0	0
LPHN2	0	0	0	0	0	0	0	0	2	0	0	0	0	0	0	0	0	0
MIR548AP	0	0	0	0	0	0	0	0	0	0	0	0	0	0	0	0	0	0
TTLL7	0	3	0	2	2	0	0	0	0	1	1	1	0	0	2	0	0	3
PRKACB	36	186	60	63	144	134	34	84	38	38	31	42	118	61	37	38	47	175
SAMD13	0	1	0	0	0	0	0	0	0	0	0	0	1	0	0	0	0	1
UOX	0	0	0	0	0	0	0	0	0	0	1	0	0	0	0	0	0	0
DNASE2B	0	0	0	0	0	0	0	0	0	0	0	0	0	0	0	0	0	0
RPF1	28	89	46	30	215	122	25	46	38	40	10	21	53	20	13	17	16	65
GNG5	44	76	41	24	178	98	42	50	38	23	9	31	39	52	19	19	17	49
CTBS	19	66	13	5	70	37	15	27	13	16	15	22	30	26	13	10	12	59
C1orf180	0	0	0	0	0	0	0	0	0	0	0	0	0	0	0	0	0	0
SSX2IP	10	19	3	12	16	32	7	11	7	7	1	8	9	10	3	5	1	12
LPAR3	0	0	0	0	0	0	0	0	0	0	0	0	0	0	0	0	0	0
MCOLN2	25	30	59	34	136	119	71	48	23	22	11	38	55	57	3	75	44	21
MCOLN3	0	0	0	2	1	0	0	0	0	0	0	0	2	2	0	1	0	0
WDR63	0	0	1	1	0	1	2	1	0	0	0	0	1	1	0	0	0	0
MIR4423	0	0	0	0	0	0	0	0	0	0	0	0	0	0	0	0	0	0
SYDE2	1	10	1	0	8	1	2	4	0	5	0	2	1	1	1	0	0	1
C1orf52	14	55	17	7	51	29	13	21	13	10	14	19	32	20	8	8	14	26
BCL10	28	69	18	16	107	62	21	46	20	33	15	35	26	36	14	17	24	57
LOC646626	0	0	0	0	1	0	0	0	0	0	0	2	0	2	0	0	0	0
DDAH1	0	0	0	0	0	0	0	0	0	0	0	0	1	0	0	0	1	0
CYR61	0	0	0	0	0	0	0	0	0	0	0	0	0	0	0	0	0	0
ZNHIT6	35	72	54	25	248	105	38	48	46	26	5	13	56	43	10	17	21	50
COL24A1	2	7	4	1	4	5	2	1	1	1	0	9	3	0	7	2	2	5
ODF2L	16	62	15	17	92	58	16	28	13	17	11	20	46	53	10	13	20	45
CLCA2	0	0	0	0	0	0	0	0	0	0	0	0	0	0	0	0	0	0
CLCA1	0	0	0	0	0	0	0	0	0	0	0	0	0	0	0	0	0	0
CLCA4	0	0	0	0	0	0	0	0	0	0	0	0	0	0	0	0	0	0
CLCA3P	0	0	0	0	0	0	0	0	0	0	0	0	0	0	0	0	0	0
SH3GLB1	143	234	104	55	351	252	110	182	81	64	40	130	167	138	52	57	82	176
42628	165	295	121	86	539	299	150	197	133	100	49	101	169	183	90	48	72	196
HS2ST1	26	65	23	15	113	72	22	34	21	24	10	36	44	44	15	5	14	37
LOC339524	0	0	0	0	0	0	0	0	0	0	0	0	0	0	0	0	0	0
LMO4	16	53	15	15	41	50	24	31	10	4	7	15	18	25	7	17	19	32
LOC100505768	0	0	0	0	0	0	0	0	0	0	0	0	0	0	0	0	0	0
PKN2	47	133	29	28	143	124	39	63	34	35	15	40	59	48	22	21	40	94
GTF2B	34	45	23	7	75	76	23	49	28	16	7	17	38	28	9	13	19	53
CCBL2	26	41	13	16	84	57	20	36	14	14	10	10	33	33	8	14	9	39
RBMXL1	41	62	24	27	136	104	25	44	33	26	11	16	51	39	18	14	15	65
GBP3	45	94	18	24	97	131	53	85	33	15	23	21	93	77	9	31	18	85
GBP1	1032	708	250	329	1759	1606	933	1184	724	358	263	80	801	1168	27	404	554	826
GBP2	469	699	291	270	1333	1140	398	677	497	252	138	114	491	389	62	201	339	559
GBP7	0	0	0	0	0	0	0	0	0	0	0	1	0	0	0	0	0	0
GBP4	578	577	363	304	1376	1539	585	692	598	251	249	122	754	542	35	233	347	337
GBP5	1025	1221	424	626	1919	2659	1163	1394	1162	492	338	150	1130	1561	30	480	713	468
GBP6	7	0	1	4	13	14	5	7	4	4	0	1	1	3	0	1	2	3
GBP1P1	9	7	2	2	11	4	8	8	4	0	3	0	10	17	0	4	5	9
LRRC8B	37	61	42	21	153	84	31	52	25	28	4	7	27	21	15	11	15	35
FLJ27354	0	3	0	0	3	1	0	0	0	1	0	0	1	0	0	0	0	2
LRRC8C	91	158	75	52	284	162	76	111	69	68	13	48	113	67	50	42	54	185
LRRC8D	29	82	30	25	112	60	16	48	11	17	9	34	38	48	26	9	11	63
GEMIN8P4	0	0	1	0	1	0	0	0	0	0	0	0	1	1	0	0	0	0
ZNF326	32	95	40	27	131	90	26	37	30	21	11	31	46	42	13	15	18	58
BARHL2	0	0	0	0	0	0	0	0	0	0	0	0	0	0	0	0	0	0
ZNF644	42	141	50	34	254	167	54	80	35	45	27	50	67	67	32	39	36	126
HFM1	0	0	0	0	0	1	0	0	0	0	0	0	0	0	0	0	0	0
CDC7	16	21	13	10	61	48	9	21	17	7	4	7	17	20	9	7	5	19
TGFBR3	14	49	43	98	133	213	37	61	30	27	27	64	121	71	20	46	59	92
BRDT	0	0	0	0	0	0	0	0	0	0	0	0	0	0	0	0	0	1
EPHX4	0	0	0	0	0	0	0	0	0	0	0	0	0	0	0	0	0	0
BTBD8	0	3	0	0	0	0	0	1	1	1	0	2	3	1	0	0	0	5
KIAA1107	0	3	0	1	5	2	1	5	3	6	0	1	5	3	4	0	1	4
C1orf146	0	0	0	0	0	0	0	0	0	0	0	0	0	0	0	0	0	0
GLMN	13	28	14	15	51	47	11	23	11	12	6	6	11	13	6	5	9	24
RPAP2	20	44	14	15	61	50	15	28	20	13	1	17	21	28	8	9	14	33
GFI1	31	68	23	36	208	104	41	66	50	51	13	17	94	49	3	15	15	40
EVI5	13	32	11	2	28	22	10	25	8	4	2	30	16	11	7	4	3	29
RPL5	674	1796	618	372	2743	1566	462	879	679	508	98	171	654	531	186	138	235	521
FAM69A	12	39	10	6	47	27	10	16	9	8	7	4	17	10	2	2	8	22
SNORD21	0	0	0	0	2	1	0	0	0	0	0	0	1	0	0	0	0	0
SNORA66	0	0	0	0	2	0	0	0	0	1	0	0	0	0	0	0	0	0
MTF2	44	98	43	31	180	143	41	50	40	28	16	23	64	50	22	30	26	72
TMED5	124	244	141	65	339	270	110	188	41	76	51	128	166	172	94	81	85	223
CCDC18	7	16	3	7	26	32	7	14	5	18	4	11	15	7	3	3	8	13
LOC100131564	10	52	6	13	47	32	9	27	20	19	2	6	40	20	13	10	10	29
DR1	94	170	71	56	314	231	74	116	49	45	22	61	102	83	28	44	46	130
FNBP1L	8	20	5	2	69	14	3	5	6	8	0	6	3	5	2	2	0	9
BCAR3	10	17	7	4	30	22	10	19	9	6	2	3	10	5	1	5	6	7
LOC100129046	0	0	0	0	1	1	0	0	0	0	1	0	0	0	0	0	0	1
MIR760	0	0	0	0	0	0	0	0	0	0	0	0	0	0	0	0	0	0
DNTTIP2	121	141	115	66	360	264	88	149	72	72	23	61	100	109	30	42	60	81
GCLM	19	35	19	13	73	50	26	22	19	10	11	13	15	22	10	13	13	16
ABCA4	0	0	0	0	0	0	0	0	0	0	0	0	0	1	0	0	0	0
ARHGAP29	0	0	0	0	1	0	0	0	0	0	0	0	0	0	0	1	0	0
ABCD3	20	39	25	20	80	67	25	49	26	14	3	11	34	29	6	8	8	34
F3	137	18	116	11	120	26	21	43	14	23	14	26	30	113	7	37	30	2
SLC44A3	0	0	0	0	0	0	0	0	0	0	0	0	0	1	0	0	0	0
CNN3	8	11	1	1	13	3	5	3	9	4	1	0	4	1	0	0	2	2
LOC729970	0	0	1	0	0	0	0	0	0	0	0	0	0	0	0	0	0	0
ALG14	1	4	0	0	2	4	1	2	6	1	1	1	3	3	0	0	0	0
TMEM56	0	0	1	0	2	0	0	0	0	2	1	0	2	2	0	0	0	0
TMEM56-RWDD3	0	1	0	0	6	3	1	2	0	0	1	0	1	0	0	0	2	2
RWDD3	5	16	5	5	22	10	2	8	7	3	0	4	10	5	0	2	4	10
FLJ31662	0	0	0	0	0	0	0	0	0	0	0	0	0	0	0	0	0	0
PTBP2	24	62	26	5	63	36	14	17	11	18	8	9	29	20	14	13	24	37
DPYD	94	222	55	29	108	90	56	120	35	42	18	183	95	194	142	53	70	394
DPYD-AS1	0	0	0	0	0	0	0	0	0	0	0	0	0	0	0	1	0	0
MIR137HG	0	0	0	0	0	0	0	0	0	0	0	0	0	0	0	0	0	0
MIR2682	0	0	0	0	0	0	0	0	0	0	0	0	0	0	0	0	0	0
MIR137	0	0	0	0	0	0	0	0	0	0	0	0	0	0	0	0	0	0
LOC729987	0	0	0	0	0	0	0	0	0	0	0	0	0	0	0	0	0	0
SNX7	2	1	0	0	0	2	1	1	1	2	0	0	1	0	0	0	0	1
LPPR5	0	0	0	0	0	0	0	0	0	0	0	0	0	0	0	0	0	0
LOC100129620	0	0	0	0	0	0	0	0	0	0	0	0	0	0	0	0	0	0
LPPR4	0	0	0	0	0	0	0	0	0	0	0	0	1	0	0	0	0	0
PALMD	0	0	0	0	0	0	0	0	0	0	0	0	0	0	0	0	0	0
MIR548AA1	0	0	0	0	0	0	0	0	0	0	0	0	0	0	0	0	0	0
MIR548D1	0	0	0	0	0	0	0	0	0	0	0	0	0	0	0	0	0	0
FRRS1	2	0	0	0	2	0	1	2	1	0	0	0	0	0	0	0	2	1
AGL	29	99	44	30	165	125	39	52	43	27	8	17	52	32	13	16	17	42
SLC35A3	18	70	28	21	105	71	21	38	8	31	2	17	39	42	9	9	17	57
HIAT1	59	127	56	43	258	181	52	82	41	41	21	46	79	102	30	19	39	97
SASS6	10	35	10	15	36	33	5	10	7	10	6	7	10	8	7	6	3	9
TRMT13	35	80	28	17	123	73	28	37	15	14	10	14	34	18	15	17	10	35
LRRC39	1	5	6	0	2	8	1	1	0	1	1	0	0	1	1	0	0	1
DBT	15	46	14	10	74	65	18	30	10	18	13	14	39	21	9	13	6	52
RTCA	35	72	33	28	129	84	27	47	32	29	7	13	43	35	19	28	21	56
MIR553	0	0	0	0	0	0	0	0	0	0	0	0	0	0	0	0	0	0
CDC14A	15	53	20	18	58	45	17	28	14	27	7	8	28	33	10	9	9	55
GPR88	0	0	0	0	1	0	2	0	0	0	0	0	0	0	0	0	0	0
LOC100128787	0	0	0	0	0	0	0	0	0	0	0	0	0	0	0	0	0	0
VCAM1	0	0	0	1	2	6	2	0	3	0	0	1	3	0	0	3	1	1
EXTL2	1	0	1	1	9	2	1	3	0	0	0	1	1	1	2	0	0	2
SLC30A7	105	164	92	53	262	196	61	111	47	54	25	55	79	97	45	59	53	128
DPH5	8	47	7	12	84	42	7	24	29	9	3	2	32	11	4	5	4	23
S1PR1	76	221	94	63	477	249	65	149	73	67	32	60	108	67	75	23	47	177
RNU6-6	0	0	0	0	0	0	0	0	0	0	0	0	0	0	0	0	0	0
OLFM3	0	0	0	0	0	0	0	0	0	0	0	0	0	0	0	0	0	0
DNAJA1P5	0	0	0	0	0	0	0	0	0	0	0	0	0	0	0	0	0	0
COL11A1	0	0	0	0	0	0	0	0	0	0	0	0	0	0	0	0	0	0
RNPC3	16	46	6	13	54	55	17	27	15	17	10	19	39	18	6	10	11	32
AMY2B	4	8	5	7	13	7	4	7	9	5	4	3	5	2	5	3	0	10
ACTG1P4	0	3	1	1	0	4	0	0	1	1	0	0	1	0	0	0	0	1
AMY2A	0	0	0	0	0	0	0	0	0	0	0	0	0	0	0	0	0	0
AMY1A	0	0	0	0	0	0	0	0	0	0	0	0	0	0	0	0	0	0
AMY1C	0	0	0	0	0	0	0	0	0	0	0	0	0	0	0	0	0	0
AMY1B	0	0	0	0	0	0	0	0	0	0	0	0	0	0	0	0	0	0
LOC100129138	0	0	0	0	0	0	0	0	0	0	0	0	0	0	0	1	0	1
PRMT6	14	24	15	13	55	40	7	11	14	16	5	3	27	13	6	5	5	15
NTNG1	0	0	0	1	0	1	0	2	0	0	0	0	0	0	0	0	0	0
VAV3	26	48	20	21	35	54	21	32	14	16	9	34	46	32	19	15	23	101
VAV3-AS1	0	0	0	0	0	0	0	0	0	1	0	0	1	0	0	1	0	0
SLC25A24	61	111	29	17	163	71	29	56	22	35	4	55	32	63	33	39	43	82
NBPF4	0	0	0	0	0	0	0	0	0	0	0	0	0	0	0	0	0	0
NBPF6	0	0	0	0	0	0	0	0	0	0	0	0	0	0	0	0	0	0
FAM102B	35	100	43	16	97	90	29	51	13	35	29	75	51	85	27	40	32	74
HENMT1	14	21	16	20	31	45	5	21	19	8	5	16	32	10	3	4	7	36
PRPF38B	155	323	159	79	601	383	94	167	119	109	52	102	194	180	75	60	94	252
FNDC7	0	0	0	0	0	0	0	0	0	0	0	0	1	0	0	0	0	1
STXBP3	71	120	58	33	190	149	50	76	34	40	22	44	69	85	36	32	44	127
AKNAD1	0	0	0	0	0	0	0	0	0	0	0	0	0	0	0	0	0	0
SRG7	0	0	0	0	0	0	0	0	0	0	0	0	0	0	0	0	0	0
GPSM2	4	1	1	0	1	5	1	2	1	1	1	1	1	3	1	0	0	7
CLCC1	25	62	18	26	115	65	21	35	31	24	12	25	36	25	20	12	24	45
WDR47	21	34	21	16	49	60	13	17	7	7	7	19	29	28	18	13	10	33
TAF13	26	22	25	3	61	44	26	22	19	14	7	19	22	27	9	10	10	17
TMEM167B	73	141	53	39	231	118	48	89	50	52	29	90	84	101	38	26	58	137
SCARNA2	50	166	28	21	208	203	39	99	118	27	33	32	123	56	69	22	29	153
C1orf194	1	0	0	0	0	0	0	0	0	0	0	0	0	0	0	0	0	0
KIAA1324	3	14	2	2	17	13	2	7	3	5	0	0	3	1	3	3	2	7
SARS	129	223	101	64	463	297	102	159	95	69	35	45	108	86	45	40	60	132
CELSR2	2	9	2	6	8	11	1	8	5	3	0	2	8	4	1	1	0	20
PSRC1	0	2	0	0	0	0	0	0	1	1	0	0	0	0	0	1	1	0
MYBPHL	0	0	0	0	0	0	0	0	0	0	0	0	0	0	0	0	0	0
SORT1	28	69	5	1	21	21	6	28	6	10	2	42	26	8	24	2	3	68
PSMA5	170	173	98	96	557	389	134	202	216	93	24	42	152	102	35	69	60	117
SYPL2	1	0	0	0	0	3	0	0	0	0	0	0	0	0	0	0	0	0
ATXN7L2	15	8	6	4	22	16	7	2	6	5	2	7	4	5	3	3	6	8
CYB561D1	37	62	23	17	97	73	22	27	35	18	11	21	48	27	22	15	16	55
AMIGO1	2	9	2	2	12	7	2	7	3	2	2	3	4	6	2	1	2	8
GPR61	0	0	0	0	0	0	0	0	0	0	0	0	0	0	0	0	0	0
GNAI3	109	175	89	65	388	231	91	151	79	63	37	97	113	171	49	60	68	145
MIR197	0	0	0	0	0	0	0	0	0	0	0	0	0	0	0	0	0	0
GNAT2	0	0	0	0	0	0	0	0	0	0	0	1	0	0	0	0	0	0
AMPD2	30	68	45	36	90	67	28	48	31	35	8	80	58	35	11	9	22	54
GSTM4	0	4	2	4	4	7	1	4	3	2	1	1	5	1	2	0	2	13
GSTM2	1	3	0	2	6	6	2	5	0	1	0	1	4	0	0	0	2	19
GSTM1	0	0	3	4	0	10	2	11	0	3	0	1	4	0	2	0	3	6
GSTM5	0	1	0	0	0	0	0	0	0	1	0	0	1	0	0	0	0	0
GSTM3	7	13	8	7	16	25	4	15	10	3	0	6	5	2	0	1	6	3
EPS8L3	0	0	0	0	0	0	0	0	0	0	0	0	0	0	0	0	0	0
CSF1	177	51	30	46	269	192	185	245	106	110	24	16	390	52	82	12	50	16
AHCYL1	102	139	39	51	233	202	64	93	75	67	35	36	131	75	34	27	31	106
STRIP1	34	88	31	41	126	98	31	48	28	25	14	33	63	48	15	18	20	76
ALX3	0	0	0	0	0	0	0	0	1	0	0	0	0	0	1	0	0	0
UBL4B	0	0	0	0	0	0	0	0	0	0	0	0	0	0	0	0	0	0
SLC6A17	0	0	0	0	0	0	0	0	0	0	0	0	0	0	0	0	0	0
KCNC4	5	7	4	1	12	10	4	7	8	7	3	0	8	2	2	2	4	9
LOC440600	0	2	0	0	0	0	0	0	2	0	0	0	0	0	0	1	0	2
RBM15	32	60	30	27	123	92	32	49	55	26	17	34	52	45	20	17	25	78
SLC16A4	3	4	0	0	0	5	1	0	0	0	2	0	2	2	0	0	0	1
LAMTOR5	84	119	39	32	242	159	67	72	69	30	9	31	54	57	19	13	21	39
PROK1	0	0	0	0	0	0	0	0	0	0	0	0	0	0	0	0	0	0
CYMP	0	0	0	0	0	0	0	0	0	0	0	0	0	0	0	0	0	0
KCNA10	0	0	0	0	0	0	0	0	0	0	0	0	0	0	0	0	0	0
KCNA2	0	1	0	0	1	0	0	0	0	0	0	0	1	0	0	0	0	0
KCNA3	31	70	16	29	140	104	43	56	24	21	4	11	28	42	19	21	22	77
CD53	418	762	337	163	961	722	338	488	284	182	136	374	437	589	227	249	236	625
LRIF1	14	44	24	6	63	34	15	22	5	12	4	14	19	18	8	13	10	28
DRAM2	13	77	15	4	30	20	10	25	10	15	4	21	35	29	16	9	11	71
CEPT1	19	55	21	13	66	75	23	32	19	14	6	18	41	30	17	17	6	57
DENND2D	39	125	41	34	194	114	42	46	54	42	7	28	57	47	33	13	14	136
CHI3L2	5	3	2	0	11	5	3	3	4	2	3	1	6	1	0	0	2	3
CHIAP2	0	0	0	0	0	0	0	0	0	0	0	0	0	0	0	0	0	0
CHIA	0	0	0	0	0	0	0	0	0	0	0	0	0	0	0	0	0	0
PIFO	0	2	0	0	0	1	0	0	0	0	0	0	0	0	0	0	0	2
PGCP1	0	0	0	0	0	0	0	0	0	0	0	0	0	0	0	0	0	0
OVGP1	2	6	4	0	7	4	2	3	3	2	0	2	3	2	2	1	4	3
WDR77	37	57	34	24	157	70	25	54	39	25	4	5	36	21	7	11	9	30
ATP5F1	75	128	54	38	340	187	49	106	67	60	12	21	73	69	17	21	21	74
C1orf162	9	32	2	3	27	5	5	6	6	2	3	11	4	9	13	1	1	65
ADORA3	6	2	0	0	1	0	0	0	0	0	0	0	1	0	12	0	0	104
LOC100129269	1	0	0	0	5	1	1	1	1	0	2	0	0	0	0	1	0	3
RAP1A	160	287	117	109	444	335	102	209	125	83	28	99	132	148	84	44	59	239
FAM212B	5	9	1	2	1	2	1	6	3	3	0	2	2	4	3	0	1	14
LOC100506343	0	0	0	0	0	0	0	0	0	0	0	0	0	0	0	0	0	0
DDX20	18	57	21	14	86	76	18	27	12	18	9	7	22	25	2	5	11	38
KCND3	0	0	0	0	0	0	0	0	0	0	0	0	0	0	0	0	0	0
LOC643355	0	0	0	0	0	0	0	0	0	0	0	0	0	0	0	0	0	0
CTTNBP2NL	22	27	31	8	13	20	22	13	9	12	6	41	16	28	12	5	12	37
MIR4256	0	0	0	0	0	0	0	0	0	0	0	0	0	0	0	0	0	0
WNT2B	0	0	0	0	0	0	0	1	0	0	2	0	0	2	0	1	0	0
ST7L	4	8	4	1	20	10	5	8	5	2	1	4	8	4	6	1	5	13
CAPZA1	286	487	208	150	950	645	238	383	148	165	78	203	303	323	151	158	133	361
MOV10	51	85	38	33	170	102	36	66	48	34	55	47	84	44	9	22	32	92
RHOC	31	31	19	9	70	30	25	28	21	14	10	28	47	32	3	10	12	24
PPM1J	1	0	0	0	0	0	0	0	0	0	0	0	0	0	0	0	0	0
FAM19A3	0	0	0	0	0	0	0	0	0	0	0	0	0	0	0	0	0	0
SLC16A1	45	46	43	22	162	93	39	50	18	24	1	10	35	29	9	12	11	9
AKR7A2P1	1	0	0	0	2	1	0	0	0	0	0	0	1	0	0	0	0	0
LRIG2	13	55	23	18	73	55	5	19	17	6	7	17	35	27	9	10	13	56
LOC643441	0	0	0	0	0	0	0	0	0	0	0	0	0	0	0	0	0	0
MAGI3	2	6	0	1	13	10	4	4	1	3	1	2	2	2	2	0	3	4
PHTF1	13	41	11	12	43	39	16	20	12	11	5	22	30	28	7	14	9	31
RSBN1	51	117	54	28	193	117	52	58	32	27	20	62	81	50	31	23	26	86
PTPN22	30	81	57	45	136	114	31	61	28	39	19	46	81	81	16	22	43	122
AP4B1-AS1	1	2	1	3	2	2	0	2	2	1	1	0	0	0	1	0	0	1
BCL2L15	1	4	2	0	0	3	0	3	1	0	1	2	0	2	0	0	0	3
AP4B1	22	39	11	20	77	62	22	31	21	20	8	8	47	22	15	6	12	36
DCLRE1B	12	23	4	8	44	35	10	17	15	5	1	15	19	16	12	5	13	27
HIPK1	142	314	132	88	493	340	134	199	135	93	69	207	234	212	86	90	81	377
OLFML3	0	0	0	0	0	1	0	0	0	0	0	1	0	1	0	0	0	0
SYT6	0	0	0	0	0	0	0	0	0	0	0	0	0	0	0	0	0	0
TRIM33	72	276	119	68	347	249	87	133	94	75	45	122	142	171	61	71	83	217
BCAS2	35	62	26	19	127	94	26	51	28	21	14	13	51	28	8	13	14	23
DENND2C	1	2	1	2	0	4	0	1	0	3	0	2	2	0	1	1	0	1
AMPD1	0	0	0	0	0	0	0	0	0	0	0	0	0	0	0	0	0	0
NRAS	169	238	144	89	443	336	123	168	97	107	30	114	125	152	63	70	95	150
CSDE1	626	1381	530	392	2211	1501	495	866	537	442	172	413	645	547	335	242	368	975
SIKE1	50	137	43	39	265	120	48	74	50	26	31	30	83	47	27	15	26	66
SYCP1	0	0	0	0	0	0	0	0	0	0	0	0	0	0	0	0	0	0
TSHB	0	0	0	0	0	0	0	0	0	0	0	0	0	0	0	0	0	0
TSPAN2	0	3	1	8	1	2	3	4	1	3	0	12	4	3	1	1	2	4
NGF	0	0	0	0	0	0	0	0	0	0	0	0	0	0	0	0	0	0
VANGL1	7	4	1	9	5	8	4	8	5	3	4	6	8	6	1	4	4	15
CASQ2	0	0	0	0	0	0	0	0	0	0	0	0	0	0	0	0	0	0
NHLH2	0	0	0	0	0	0	0	0	0	0	0	0	0	0	0	0	0	0
SLC22A15	11	19	8	0	6	12	7	6	2	2	5	28	17	9	14	1	2	20
MAB21L3	0	0	1	0	0	0	1	0	0	0	0	1	1	0	0	0	0	0
ATP1A1	298	479	321	166	938	599	221	357	206	171	35	213	262	229	134	78	105	410
ATP1A1OS	3	7	3	2	3	5	1	4	2	2	0	3	3	4	2	0	1	3
CD58	25	55	27	7	90	83	30	41	22	22	10	41	35	48	32	15	22	79
IGSF3	3	5	13	1	22	9	4	2	1	5	1	5	8	3	3	4	13	7
MIR320B1	0	0	0	0	0	0	0	0	0	0	0	0	0	0	0	0	0	0
CD2	152	303	145	138	832	481	163	254	157	158	17	23	155	148	34	62	80	109
PTGFRN	10	9	10	2	30	11	5	9	18	7	1	0	5	1	0	1	1	4
CD101	1	6	6	0	14	1	0	4	5	0	0	1	3	0	3	2	2	6
TTF2	17	46	42	27	123	89	30	44	53	35	8	6	25	18	14	17	26	51
MIR942	0	0	0	0	0	0	0	0	0	0	0	0	0	0	0	0	0	0
TRIM45	0	1	2	0	0	1	0	0	0	1	0	0	1	0	0	0	0	0
VTCN1	0	0	0	0	0	0	0	0	0	0	0	0	0	0	0	0	0	0
MAN1A2	67	127	63	35	225	182	53	84	49	43	26	36	83	88	34	30	36	119
FAM46C	65	220	78	73	406	201	119	142	71	97	88	69	184	300	31	86	55	173
GDAP2	24	61	24	16	110	75	27	47	16	29	16	36	46	44	29	22	15	82
WDR3	46	62	43	31	240	114	37	46	47	22	8	7	25	31	6	13	17	25
SPAG17	0	0	0	0	3	2	0	0	0	0	0	0	0	0	0	1	0	0
TBX15	0	0	0	0	0	0	0	0	0	0	0	0	0	0	0	0	0	0
WARS2	15	12	11	12	43	23	8	16	11	3	1	5	10	5	3	6	3	6
HAO2	0	0	0	0	0	0	0	0	0	0	0	0	0	0	0	0	0	0
HSD3B2	0	0	0	0	0	0	0	0	0	0	0	0	0	0	0	0	0	0
HSD3B1	0	0	0	0	0	0	0	0	0	0	0	0	0	0	0	0	0	0
HSD3BP4	0	0	0	0	0	0	0	0	0	0	0	0	1	0	0	0	0	0
LINC00622	0	0	0	0	0	0	0	1	0	1	0	1	1	0	0	1	0	2
ZNF697	58	53	36	6	54	36	20	47	20	25	11	142	61	75	48	17	40	67
PHGDH	5	16	8	5	34	15	7	7	15	1	1	0	10	1	0	0	2	1
HMGCS2	0	0	0	0	0	0	0	0	0	0	0	0	0	0	0	0	0	0
REG4	1	2	1	0	2	1	0	1	1	1	0	0	2	0	0	0	0	4
NBPF7	0	0	1	0	1	2	0	0	0	0	0	2	0	1	1	2	0	1
ADAM30	0	0	0	0	0	0	0	0	0	0	0	0	0	0	0	0	0	0
NOTCH2	250	467	336	156	823	537	195	394	257	195	98	799	344	469	224	247	267	495
FAM72B	0	1	2	1	0	1	1	1	1	0	0	1	1	0	1	0	1	0
HIST2H2BA	0	0	0	0	0	0	0	0	1	0	0	0	0	0	0	0	0	0
FCGR1B	15	7	1	0	6	2	3	4	1	2	1	3	1	12	0	2	2	6
SRGAP2D	3	5	0	0	2	4	3	1	1	2	0	0	2	0	1	3	0	1
EMBP1	1	3	1	0	3	4	1	5	1	1	0	0	3	5	0	0	0	4
ANKRD20A12P	0	1	0	0	0	0	0	0	0	0	0	0	0	0	0	0	1	0
LOC100130000	0	0	0	0	0	0	0	0	0	0	0	0	0	0	0	0	0	0
FLJ39739	0	0	0	0	0	0	0	0	0	0	0	0	0	0	0	0	0	0
LOC100286793	0	0	1	0	6	1	1	1	1	0	1	2	0	1	0	0	0	1
PPIAL4G	0	0	0	0	0	1	0	0	0	0	0	0	0	0	0	0	0	0
FAM72D	0	0	0	0	0	1	0	0	0	0	0	0	0	0	0	0	0	1
LINC00623	0	0	2	0	0	0	0	1	0	0	0	0	0	0	0	0	0	0
LOC728875	0	1	0	0	3	0	0	2	0	0	0	0	1	0	0	1	0	0
PPIAL4C	0	0	0	0	0	0	0	0	0	0	0	0	0	0	0	0	0	0
PPIAL4B	0	0	0	0	0	0	0	0	0	0	0	0	0	0	0	0	0	0
PPIAL4A	0	0	0	0	0	0	0	0	0	0	0	0	0	0	0	0	0	0
PFN1P2	2	0	5	1	4	0	0	4	1	3	0	1	1	2	1	0	2	3
NBPF9	54	28	39	7	86	37	10	34	18	18	9	27	19	40	27	23	46	49
LOC653513	1	5	6	1	9	2	0	1	3	1	2	3	4	3	2	2	0	2
PDE4DIP	323	437	404	110	469	391	140	429	222	157	48	583	365	536	320	278	232	462
SEC22B	103	152	100	64	328	225	80	127	72	69	37	124	113	140	76	57	80	208
NOTCH2NL	71	139	81	42	175	133	39	119	42	46	28	183	105	95	45	54	111	126
NBPF10	17	43	24	11	51	33	14	29	24	18	12	47	26	34	11	14	37	38
HFE2	0	0	0	0	0	0	0	0	0	0	0	0	0	0	0	0	0	0
TXNIP	508	1305	259	113	657	412	184	391	177	173	183	503	329	450	379	120	260	1517
POLR3GL	16	31	15	18	49	59	12	27	15	18	7	7	28	13	5	6	9	41
ANKRD34A	6	3	0	0	5	3	2	0	2	0	0	1	0	1	1	0	0	2
LIX1L	29	49	21	19	75	49	21	39	40	21	3	11	30	26	16	17	8	36
RBM8A	172	193	130	76	529	309	115	184	112	86	31	77	131	131	32	43	62	109
GNRHR2	8	7	6	2	17	13	0	4	2	9	0	10	11	3	1	2	2	5
PEX11B	18	35	27	16	94	56	10	34	26	13	0	8	27	19	6	9	11	39
ITGA10	2	7	2	2	8	4	4	5	2	6	1	0	4	6	1	1	0	1
ANKRD35	0	0	0	0	0	1	0	0	0	1	0	0	0	0	0	0	0	0
PIAS3	15	55	20	14	80	56	11	40	22	11	14	26	33	25	10	6	12	47
NUDT17	0	1	1	1	0	1	1	0	0	0	1	0	1	2	0	0	0	1
POLR3C	30	37	18	15	85	59	18	33	16	13	7	17	21	14	9	18	17	38
RNF115	29	39	21	15	95	78	17	48	26	15	11	17	46	27	16	15	23	60
CD160	0	0	1	5	2	6	4	0	0	1	0	2	2	0	0	0	0	0
PDZK1	0	0	2	1	2	0	0	0	2	0	0	1	1	0	0	1	0	0
GPR89A	0	4	0	3	13	5	1	7	3	2	0	0	3	1	0	2	0	6
GPR89C	0	0	0	0	0	0	0	0	0	0	0	0	0	0	0	0	0	0
PDZK1P1	0	0	0	0	0	0	0	0	0	0	0	0	0	0	0	0	0	0
NBPF11	0	0	0	0	0	0	0	0	0	0	0	0	0	0	0	0	0	0
NBPF24	0	1	1	0	0	2	0	2	0	1	0	2	0	1	1	0	1	2
HYDIN2	0	0	0	0	0	0	0	0	0	0	0	0	0	0	0	0	0	0
LOC728989	0	4	0	0	2	0	1	4	1	0	0	0	1	2	0	0	1	4
PRKAB2	20	62	21	18	73	56	12	27	17	16	11	16	32	34	18	9	14	48
PDIA3P	5	3	6	1	14	7	2	5	11	0	1	2	7	2	4	1	3	3
FMO5	2	1	0	0	0	0	0	0	0	0	0	6	0	1	0	0	1	2
CHD1L	26	78	38	24	141	97	45	45	49	26	8	18	54	40	14	7	7	43
LINC00624	0	0	0	0	0	0	0	0	0	0	0	0	0	0	0	0	0	0
BCL9	25	32	18	9	49	42	18	23	27	13	2	6	19	12	5	7	2	17
ACP6	2	15	1	2	8	5	4	7	7	1	4	2	12	4	2	3	1	10
GJA5	0	0	0	0	0	0	0	0	0	0	0	0	0	0	0	0	0	0
GJA8	0	0	0	0	0	0	0	0	0	0	0	0	0	0	0	0	0	0
GPR89B	2	2	1	2	4	7	0	0	0	0	1	0	1	0	1	0	1	2
MIR5087	0	0	0	0	0	0	0	0	0	0	0	0	0	0	0	0	0	0
NBPF14	16	30	21	7	24	10	8	24	16	9	2	31	13	28	12	4	17	11
PPIAL4F	0	0	0	0	0	0	0	0	0	0	0	0	0	0	0	0	0	0
PPIAL4D	0	0	0	0	0	0	0	0	0	0	0	0	0	0	0	0	0	0
NBPF15	10	11	7	1	17	5	2	8	2	1	4	5	5	11	4	3	4	11
NBPF16	5	10	6	1	17	9	6	9	7	8	1	13	10	7	4	2	11	24
PPIAL4E	0	0	0	0	0	0	0	0	0	0	0	0	0	0	0	0	0	0
LOC645166	0	0	0	0	1	0	0	1	0	0	0	0	0	0	0	1	0	0
LOC388692	9	47	23	22	104	62	23	40	31	15	30	21	57	29	21	15	20	138
FCGR1C	0	1	0	0	0	0	0	0	0	0	0	0	0	1	0	0	0	0
FAM91A2	0	5	1	0	2	3	2	4	1	0	1	0	5	2	0	1	2	4
HIST2H2BF	0	1	0	0	6	0	0	0	1	0	3	1	0	0	1	0	0	0
FCGR1A	5	7	1	0	16	6	1	6	2	1	0	2	3	17	0	0	0	5
HIST2H3D	1	0	0	0	1	0	0	0	1	0	0	0	0	0	0	0	0	0
HIST2H4A	0	0	0	0	0	0	0	0	0	0	0	0	0	0	0	0	0	0
HIST2H4B	0	0	0	0	0	0	0	0	0	0	0	0	0	0	0	0	0	0
HIST2H3C	0	0	0	0	0	0	0	0	0	0	0	0	0	0	0	0	0	0
HIST2H3A	0	0	0	0	0	0	0	0	0	0	0	0	0	0	0	0	0	0
HIST2H2AA4	0	0	0	0	0	0	0	0	0	0	0	0	0	0	0	0	0	0
HIST2H2AA3	0	0	0	0	0	0	0	0	0	0	0	0	0	0	0	0	0	0
HIST2H2BC	0	0	0	0	0	0	0	0	0	0	0	1	0	0	0	0	0	1
HIST2H2BE	8	13	6	1	19	10	0	6	4	7	9	4	12	6	4	3	6	14
HIST2H2AC	0	1	1	0	3	0	0	2	0	0	0	0	1	0	1	0	0	2
HIST2H2AB	0	0	0	0	0	0	0	1	0	0	0	1	1	0	1	0	0	0
BOLA1	5	2	2	2	5	4	4	7	4	0	2	1	4	1	2	2	1	5
SV2A	6	10	4	2	10	14	8	4	4	6	1	2	9	4	1	1	3	1
SF3B4	73	60	46	33	206	123	41	89	41	37	9	29	68	48	15	29	28	67
MTMR11	4	2	3	2	14	0	7	7	2	2	1	2	4	3	0	4	2	1
OTUD7B	20	33	36	17	111	75	30	46	39	19	7	12	38	28	8	15	13	18
VPS45	20	36	23	13	67	50	11	21	15	20	6	13	27	26	5	8	10	35
PLEKHO1	204	208	100	59	280	267	111	228	126	72	45	147	197	177	74	57	117	255
ANP32E	168	285	153	128	822	579	180	224	134	141	17	45	175	181	43	84	73	125
CA14	0	1	0	0	0	0	0	0	0	0	0	0	0	0	0	0	0	0
APH1A	158	232	99	89	391	260	83	146	125	71	28	78	152	119	42	28	68	141
C1orf54	2	4	0	0	4	3	1	2	1	0	0	1	2	0	2	0	1	2
C1orf51	0	0	1	1	1	2	1	0	1	1	0	0	1	1	0	0	0	0
MRPS21	51	88	29	33	128	112	29	63	53	29	10	8	49	36	23	8	18	60
PRPF3	174	188	89	51	299	229	77	139	81	54	26	70	124	116	41	74	61	155
RPRD2	36	101	29	47	162	127	48	90	41	47	19	33	63	43	25	23	23	89
TARS2	16	27	23	12	59	36	21	20	16	19	1	10	36	9	9	4	10	18
ECM1	5	2	0	0	3	2	1	1	2	0	0	0	0	2	2	0	1	0
LINC00568	0	0	0	0	1	1	0	0	1	0	0	0	0	0	0	0	0	0
ADAMTSL4	19	49	10	2	27	19	24	38	25	11	1	14	30	17	17	12	14	21
MIR4257	0	0	0	0	0	0	1	0	0	0	0	0	0	0	0	0	0	0
MCL1	1078	1948	678	428	2597	1938	795	1179	719	513	317	830	1181	1510	506	490	527	1428
ENSA	135	220	128	93	577	398	139	206	206	87	50	66	181	147	56	62	66	174
GOLPH3L	6	22	17	9	71	34	12	13	15	9	3	4	21	14	7	7	5	16
HORMAD1	0	2	0	0	0	1	1	0	1	0	0	0	1	2	0	0	1	0
CTSS	611	1159	315	194	915	873	346	609	290	219	175	651	481	676	347	267	452	1103
CTSK	7	11	3	3	6	8	0	7	5	1	2	7	14	7	3	1	5	8
ARNT	44	129	54	29	185	124	36	65	58	35	15	69	91	86	36	34	25	97
SETDB1	55	91	46	20	176	103	48	53	45	24	14	36	92	48	21	23	29	109
CERS2	110	186	89	50	317	214	81	116	93	59	35	103	127	139	62	45	44	175
ANXA9	0	0	1	0	2	1	0	1	0	0	0	1	0	0	0	0	0	0
FAM63A	5	12	4	3	23	14	4	9	10	6	2	5	4	7	1	7	1	15
PRUNE	8	27	16	7	59	25	13	18	17	13	5	17	27	12	13	3	7	20
BNIPL	1	3	0	0	4	1	1	0	1	0	0	0	2	0	1	0	0	1
C1orf56	4	3	1	1	2	0	0	1	1	1	0	0	6	1	0	0	2	1
CDC42SE1	294	426	212	189	703	534	201	336	213	126	84	261	338	281	142	153	193	611
MLLT11	2	5	3	1	9	9	1	4	0	1	3	5	5	2	2	0	3	2
GABPB2	8	17	6	5	22	22	6	11	12	12	1	5	11	7	9	4	4	20
SEMA6C	1	1	3	0	3	3	2	3	0	1	0	0	2	1	0	0	1	1
TNFAIP8L2	16	12	2	4	19	21	5	9	2	4	1	6	12	4	3	1	3	9
TNFAIP8L2-SCNM1	0	1	0	0	0	1	0	0	0	0	0	0	0	0	1	0	0	0
LYSMD1	4	2	3	2	11	16	4	5	5	4	3	5	6	1	2	2	1	9
SCNM1	6	20	7	4	13	17	5	10	10	3	7	2	2	7	4	5	3	11
TMOD4	1	3	1	1	5	2	1	0	0	1	1	0	0	0	0	1	0	3
VPS72	27	42	30	17	116	60	18	29	33	18	7	17	25	28	9	8	10	37
PIP5K1A	74	118	53	39	229	128	53	76	61	46	16	49	69	75	23	31	32	82
PSMD4	152	161	84	59	503	254	96	159	136	66	27	63	98	103	44	46	70	105
ZNF687	56	66	25	22	133	101	21	57	40	28	18	46	55	62	18	21	26	78
PI4KB	53	124	54	39	201	164	67	104	70	42	28	52	83	68	44	25	35	121
RFX5	87	165	58	59	305	237	63	126	94	50	25	47	112	67	35	30	38	112
SELENBP1	1	0	1	0	8	0	0	0	0	12	0	0	6	5	0	0	0	1
PSMB4	201	235	137	82	525	377	138	190	165	86	42	78	163	146	40	46	80	119
POGZ	95	236	87	90	338	243	72	132	88	62	32	89	151	106	54	43	67	166
CGN	4	5	2	0	2	12	1	5	9	1	1	5	7	0	1	1	2	1
TUFT1	0	8	5	1	5	8	3	4	4	0	0	3	4	7	2	2	1	0
MIR554	0	0	0	0	0	0	0	0	0	2	0	0	0	0	0	0	0	0
SNX27	73	156	40	39	159	115	47	72	40	46	19	87	93	94	47	36	34	156
CELF3	1	0	0	0	0	0	0	0	0	1	0	0	0	0	0	0	0	0
RIIAD1	0	0	0	0	0	0	0	0	0	0	0	0	0	0	0	0	0	0
MRPL9	37	48	32	19	154	71	40	34	36	15	8	12	47	21	9	12	18	30
OAZ3	0	0	0	0	4	2	0	0	1	0	2	1	0	0	0	0	0	0
TDRKH	6	29	11	12	59	33	12	19	19	5	5	3	20	11	4	1	9	15
LINGO4	0	1	0	0	8	0	0	0	0	0	0	0	3	0	0	0	0	0
RORC	6	10	7	8	75	27	2	22	3	11	1	6	15	36	1	1	1	5
C2CD4D	2	0	0	1	0	1	0	2	0	0	0	0	1	2	0	1	0	1
LOC100132111	8	5	4	3	18	8	1	7	6	7	0	1	3	3	0	0	4	3
THEM5	1	0	0	0	2	0	0	0	0	0	0	0	0	0	0	1	0	0
THEM4	9	12	19	7	73	46	13	32	12	14	2	1	18	12	4	3	7	31
S100A10	155	303	103	34	250	159	94	131	95	51	21	233	108	240	93	83	81	194
S100A11	182	279	99	54	402	206	98	200	136	78	38	234	187	210	97	120	123	224
TCHHL1	0	0	0	0	0	0	0	0	0	0	0	0	0	0	0	0	0	0
TCHH	0	0	1	0	1	0	0	0	0	0	0	0	0	0	0	0	0	2
RPTN	0	0	0	0	0	0	0	0	0	0	0	0	0	0	0	0	0	0
HRNR	0	0	0	0	0	0	0	0	0	0	0	0	0	0	0	0	0	0
FLG	2	0	1	0	0	0	0	0	0	0	0	0	0	0	0	0	0	0
FLG2	0	0	0	0	0	0	0	0	0	0	0	0	0	0	0	0	0	0
CRNN	0	0	0	0	0	0	0	0	0	0	0	0	0	0	0	0	0	0
LCE5A	0	0	0	0	0	0	0	0	0	0	0	0	0	0	0	0	0	0
CRCT1	0	0	0	0	0	0	0	0	0	0	0	0	0	0	0	0	0	0
LCE3E	0	0	0	0	0	0	0	0	0	0	0	0	0	0	0	0	0	0
LCE3D	0	0	0	0	0	0	0	0	0	0	0	0	0	0	0	0	0	0
LCE3C	0	0	0	0	0	0	0	0	0	0	0	0	0	0	0	0	0	0
LCE3B	0	0	0	0	0	0	0	0	0	0	0	0	0	0	0	0	0	0
LCE3A	0	0	0	0	0	0	0	0	0	0	0	0	0	0	0	0	0	0
LCE2D	0	0	0	0	0	0	0	0	0	0	0	0	0	0	0	0	0	0
LCE2C	0	0	0	0	0	0	0	0	0	0	0	0	0	0	0	0	0	0
LCE2B	0	0	0	0	0	0	0	0	0	0	0	0	0	0	0	0	0	0
LCE2A	0	0	0	0	0	0	0	0	0	0	0	0	0	0	0	0	0	0
LCE4A	0	0	0	0	0	0	0	0	0	0	0	0	0	0	0	0	0	0
C1orf68	0	0	0	0	0	0	0	0	0	0	0	0	0	0	0	0	0	0
KPRP	0	0	0	0	0	0	0	0	0	0	0	0	0	0	0	0	0	0
LCE1F	0	0	0	0	0	0	0	0	0	0	0	0	0	0	0	0	0	0
LCE1E	0	0	0	0	0	0	0	0	0	0	0	0	0	0	0	0	0	0
LCE1D	0	0	0	0	0	0	0	0	0	0	0	0	0	0	0	0	0	0
LCE1C	0	0	0	0	0	0	0	0	0	0	0	0	0	0	0	0	0	0
LCE1B	0	0	0	0	0	0	0	0	0	0	0	0	0	0	0	0	0	0
LCE1A	0	0	0	0	0	0	0	0	0	0	0	0	0	0	0	0	0	0
LCE6A	0	0	0	0	0	0	0	0	0	0	0	0	0	0	0	0	0	0
SMCP	0	0	0	0	0	0	0	0	0	0	0	0	0	0	0	0	0	0
IVL	0	0	0	0	0	0	0	0	0	0	0	0	0	0	0	0	0	0
SPRR4	0	0	0	0	0	0	0	0	0	0	0	0	0	0	0	0	0	0
SPRR1A	0	0	0	0	0	0	0	0	0	0	0	0	0	0	0	0	0	0
SPRR3	0	0	0	0	0	0	0	0	0	0	0	0	0	0	0	0	0	0
SPRR1B	0	0	0	0	0	0	0	0	0	0	0	0	0	0	0	0	0	0
SPRR2D	0	0	0	0	0	0	0	0	0	0	0	0	0	0	0	0	0	0
SPRR2A	0	0	0	0	0	0	0	0	0	0	0	0	0	0	0	0	0	0
SPRR2B	0	0	0	0	0	0	0	0	0	0	0	0	0	0	0	0	0	0
SPRR2E	0	0	0	0	0	0	0	0	0	0	0	0	0	0	0	0	0	0
SPRR2F	0	0	0	0	0	0	0	0	0	0	0	0	0	0	0	0	0	0
SPRR2C	0	0	0	0	0	0	0	0	0	0	0	0	0	0	0	0	0	0
SPRR2G	0	0	0	0	0	0	0	0	0	0	0	0	0	0	0	0	0	0
LELP1	0	0	0	0	0	0	0	0	0	0	0	0	0	0	0	0	0	0
PRR9	0	0	0	0	0	0	0	0	0	0	0	0	0	0	0	0	0	0
LOR	1	0	0	0	0	0	0	0	0	0	0	1	1	0	0	0	0	0
PGLYRP3	0	0	0	0	0	0	0	0	0	0	0	0	0	0	0	0	0	0
PGLYRP4	0	0	0	0	0	0	0	0	0	0	0	0	0	0	0	0	0	0
S100A9	585	653	214	35	810	270	258	318	151	143	107	811	448	597	161	141	201	646
S100A12	42	104	26	4	72	24	18	18	21	15	11	117	36	58	22	5	30	95
S100A8	378	337	63	10	274	92	74	120	83	69	58	685	221	283	122	38	92	339
S100A7A	0	0	0	0	0	0	0	0	0	0	0	0	0	0	0	0	0	0
S100A7L2	0	0	0	0	0	0	0	0	0	0	0	0	0	0	0	0	0	0
S100A7	0	0	0	0	0	0	0	0	0	0	0	0	0	0	0	0	0	0
S100A6	147	248	45	68	307	158	61	174	132	53	14	109	106	93	65	37	56	231
S100A5	0	0	0	0	0	0	0	0	1	0	0	0	0	0	0	0	0	0
S100A4	29	80	12	28	98	40	22	61	35	28	6	46	30	32	11	7	21	70
S100A3	0	0	0	0	0	0	0	0	0	0	0	0	0	0	0	0	0	0
S100A2	0	0	0	0	2	1	0	2	0	0	0	0	0	0	0	0	2	1
S100A16	0	0	0	0	0	0	0	0	0	0	0	0	0	0	0	0	0	0
S100A14	0	0	0	1	0	1	0	0	0	0	0	0	1	0	0	0	1	1
S100A13	0	5	0	0	3	1	0	1	1	1	0	0	0	1	0	0	1	5
S100A1	0	0	0	0	1	0	0	1	0	0	0	0	0	0	2	0	0	0
CHTOP	92	147	85	37	265	173	56	103	88	49	25	68	108	74	42	30	44	109
SNAPIN	20	25	14	12	45	45	12	17	17	13	1	21	20	22	11	3	13	17
ILF2	183	220	178	105	693	339	111	222	167	94	24	73	142	105	34	44	54	103
NPR1	1	4	2	0	1	2	4	1	3	1	0	4	1	1	1	0	2	3
INTS3	62	127	46	47	199	129	49	84	74	49	14	49	88	46	24	30	40	94
SLC27A3	24	29	5	8	24	21	10	18	7	16	4	33	26	14	15	3	12	30
GATAD2B	100	268	122	88	391	299	89	150	97	87	42	115	134	118	82	56	64	260
DENND4B	170	293	147	98	402	297	101	178	150	107	67	218	220	245	78	90	116	297
CRTC2	92	123	70	34	248	157	56	87	62	33	29	121	101	126	47	35	58	111
SLC39A1	92	133	67	28	191	153	43	82	72	42	18	156	59	110	45	42	35	125
CREB3L4	1	5	2	1	2	1	1	4	1	4	0	0	5	2	2	1	2	5
JTB	59	109	68	42	219	133	45	88	75	45	24	46	70	92	30	22	24	82
RAB13	54	107	31	10	66	48	19	46	17	18	3	129	33	92	35	15	29	92
RPS27	412	1210	427	267	1836	1108	267	663	639	351	122	262	492	453	184	154	267	564
NUP210L	1	1	0	0	0	1	1	0	0	0	0	1	1	0	0	0	0	0
TPM3	839	1034	470	352	2042	1344	559	858	479	431	114	375	732	668	260	273	340	663
MIR190B	0	0	0	0	0	0	0	0	0	0	0	0	0	0	0	0	0	0
C1orf189	0	0	0	0	0	1	0	0	0	0	0	0	0	1	0	0	0	0
C1orf43	125	190	104	44	325	219	79	158	99	76	27	95	112	113	56	52	61	194
UBAP2L	170	208	163	84	567	382	142	152	171	110	40	94	149	121	54	67	73	176
HAX1	41	72	41	24	226	109	33	37	43	23	13	14	34	37	14	11	22	53
AQP10	0	0	0	0	0	0	0	0	0	0	1	0	0	0	0	0	0	0
ATP8B2	94	168	71	79	273	175	78	119	99	61	40	20	120	95	31	37	24	126
IL6R	199	177	103	43	248	243	123	182	124	63	41	197	145	140	60	114	107	185
SHE	0	0	0	0	0	0	0	0	0	0	0	0	0	0	0	0	0	0
TDRD10	0	0	0	0	0	0	0	0	0	0	0	0	0	0	0	0	0	0
UBE2Q1	88	104	59	41	240	177	54	89	69	40	22	54	76	71	31	24	34	99
CHRNB2	0	3	0	1	2	1	1	1	0	1	1	1	3	0	0	0	0	1
ADAR	553	1008	442	392	2383	1357	490	788	576	331	294	309	680	620	184	325	287	900
KCNN3	1	0	1	2	2	0	1	0	2	1	0	2	1	2	0	0	0	0
PMVK	20	21	12	16	93	50	12	26	24	18	2	5	18	9	2	8	7	15
PBXIP1	46	242	99	70	321	242	88	147	123	99	28	94	176	160	97	29	76	345
PYGO2	38	94	41	21	139	99	30	52	43	23	16	26	53	42	20	19	22	54
SHC1	65	100	53	54	201	165	42	105	48	33	26	68	82	79	39	28	51	106
CKS1B	4	8	8	3	41	17	3	6	13	4	6	0	12	1	0	5	4	2
MIR4258	0	0	0	0	0	0	0	0	0	0	0	0	0	0	0	0	0	0
FLAD1	36	46	22	25	130	99	23	42	49	26	15	20	40	24	4	10	12	23
LENEP	0	0	0	0	0	0	0	0	0	0	0	0	0	0	0	0	0	0
ZBTB7B	77	124	55	36	230	182	69	94	70	39	22	77	86	88	42	33	43	141
DCST2	0	0	0	0	0	0	0	0	0	0	0	0	0	0	0	0	0	0
DCST1	0	0	0	0	0	1	0	0	0	0	0	0	0	0	0	0	0	0
LOC100505666	0	0	0	1	2	1	0	0	0	0	0	0	0	0	0	0	1	1
ADAM15	14	25	18	20	60	54	15	21	12	3	2	6	22	20	9	4	8	12
EFNA4	4	5	8	1	7	6	0	1	1	0	1	0	1	4	1	2	1	4
EFNA3	0	0	0	0	1	1	0	1	2	1	0	0	0	0	1	0	0	2
EFNA1	0	0	0	0	0	0	0	0	0	0	0	0	0	0	0	0	0	0
SLC50A1	21	38	15	14	52	38	11	21	27	17	6	12	23	16	5	9	10	36
DPM3	13	23	9	5	21	28	5	7	19	7	2	2	6	12	9	2	4	10
KRTCAP2	20	59	22	15	150	68	19	42	36	20	6	19	35	24	17	9	12	39
TRIM46	3	4	2	4	12	7	1	3	3	3	0	0	7	3	0	0	3	2
MUC1	5	6	0	2	15	9	2	4	5	0	2	2	2	4	0	6	2	3
MIR92B	0	0	0	0	0	0	0	0	0	0	0	0	0	0	0	0	0	0
THBS3	6	9	3	5	17	7	2	12	10	5	1	2	14	7	7	3	7	22
MTX1	19	4	6	7	47	18	7	19	18	5	2	4	9	5	5	4	4	7
GBAP1	0	0	1	3	1	1	0	1	1	2	1	0	1	0	0	0	0	6
GBA	35	41	14	12	35	39	28	41	22	11	11	43	32	40	11	30	20	40
FAM189B	14	29	15	5	50	30	15	16	21	2	3	18	19	10	1	4	8	13
SCAMP3	63	67	39	23	145	99	37	58	56	28	10	10	48	42	15	12	14	37
CLK2	42	82	36	23	125	100	25	48	49	35	14	31	64	54	14	19	19	76
HCN3	1	5	2	1	2	4	0	1	5	2	0	0	4	3	0	0	3	3
PKLR	0	0	0	0	0	0	0	0	0	0	0	0	0	0	0	0	0	0
FDPS	91	113	67	71	303	209	84	124	121	58	21	43	122	81	24	26	31	64
RUSC1-AS1	1	1	0	0	2	1	0	0	0	0	1	2	0	0	0	0	0	0
RUSC1	12	21	10	6	42	28	12	8	12	7	3	12	8	16	0	3	1	12
ASH1L	227	469	231	152	832	588	199	304	209	154	98	223	348	324	124	141	181	471
MIR555	0	0	0	0	0	0	0	0	0	0	0	0	0	0	0	0	0	0
POU5F1P4	1	0	0	0	0	0	0	0	0	0	1	0	1	0	1	0	0	0
ASH1L-AS1	1	10	4	3	15	10	2	4	2	1	2	2	1	5	1	2	1	7
MSTO1	6	3	3	7	7	11	6	3	2	2	0	2	5	2	1	1	1	2
MSTO2P	1	3	0	8	8	8	2	1	1	1	0	0	6	2	1	1	3	5
YY1AP1	51	96	51	37	168	143	54	61	45	46	27	62	87	57	28	29	50	125
DAP3	112	151	73	42	322	209	68	119	93	52	32	32	88	107	35	35	58	82
GON4L	72	146	69	49	271	213	60	103	77	46	36	53	115	104	49	45	45	147
SYT11	16	66	25	38	65	100	23	32	21	24	11	28	36	45	10	14	23	57
RIT1	115	121	91	27	227	160	65	107	57	45	30	93	101	114	68	46	59	180
KIAA0907	46	104	53	32	195	111	41	78	51	37	20	26	80	43	40	25	32	100
SNORA42	0	0	0	0	0	0	0	0	0	0	0	0	0	0	0	0	0	0
SCARNA4	0	0	0	0	1	2	0	2	1	0	0	0	0	0	0	0	0	0
RXFP4	0	0	0	0	0	0	0	1	0	0	0	0	0	0	0	0	0	0
ARHGEF2	189	237	161	90	454	324	133	213	139	81	48	186	226	179	103	108	106	213
SSR2	90	138	63	59	255	203	67	113	89	48	31	62	98	84	56	47	41	137
UBQLN4	34	28	17	15	72	71	29	35	23	15	6	10	21	18	7	13	7	21
LAMTOR2	13	12	8	11	40	26	2	16	13	11	3	5	18	9	3	1	2	7
RAB25	0	0	0	0	0	0	0	1	0	0	0	0	0	0	0	0	0	0
MEX3A	1	1	0	1	4	1	0	1	2	0	0	1	1	1	0	0	0	0
LMNA	394	286	187	194	761	572	258	329	289	177	21	109	221	166	147	106	221	381
SEMA4A	107	112	38	22	104	101	55	106	46	48	19	87	71	88	63	47	63	288
SLC25A44	60	52	36	35	146	106	50	57	62	44	18	33	55	44	23	10	32	73
PMF1	17	20	9	11	45	35	10	19	22	15	2	2	19	10	3	4	11	12
PMF1-BGLAP	0	0	1	2	0	1	0	1	1	2	1	1	0	1	0	0	1	1
BGLAP	0	0	0	1	0	0	0	0	0	0	0	0	0	0	0	1	0	0
PAQR6	1	2	1	3	1	5	1	1	1	1	0	0	3	3	0	0	4	0
SMG5	122	146	100	80	378	246	97	112	124	50	45	72	125	105	65	48	53	187
TMEM79	1	8	3	3	13	5	3	6	2	3	3	3	9	4	3	2	1	13
C1orf85	14	20	12	7	34	20	10	19	14	6	8	5	16	14	16	14	9	38
VHLL	0	1	0	1	0	0	0	0	0	0	0	2	0	2	1	1	0	0
CCT3	207	249	210	110	907	510	168	260	262	121	38	42	170	101	31	52	46	94
TSACC	0	0	0	0	0	1	0	0	0	0	0	0	0	0	0	0	0	0
RHBG	0	0	0	0	0	0	0	0	0	0	0	0	0	0	0	0	0	0
C1orf61	2	0	0	1	2	3	0	1	0	1	0	0	1	1	1	1	0	0
MIR9-1	0	0	0	0	0	0	0	0	0	0	0	0	0	0	0	0	0	0
MEF2D	112	188	108	75	308	261	86	171	96	55	39	113	207	138	61	42	86	237
IQGAP3	0	1	0	0	2	2	0	0	0	0	0	0	0	0	0	0	0	1
TTC24	2	5	4	0	21	10	3	13	25	2	3	3	7	6	2	2	1	5
APOA1BP	23	38	16	13	97	63	16	34	39	13	2	4	28	15	6	8	9	13
GPATCH4	83	59	57	59	330	172	60	62	62	43	5	7	48	23	12	14	21	21
HAPLN2	0	0	0	0	0	0	0	0	0	0	0	0	0	0	0	0	0	0
BCAN	0	0	0	0	0	0	0	0	0	0	0	0	0	0	0	0	0	0
NES	0	0	0	0	1	1	0	0	0	0	0	0	0	0	0	1	0	0
CRABP2	0	2	1	2	1	2	0	0	3	0	2	0	1	2	0	0	0	3
ISG20L2	22	53	23	19	94	54	15	32	18	15	6	21	44	30	10	11	12	36
RRNAD1	11	15	5	6	22	20	3	14	18	4	5	10	21	6	4	1	6	26
MRPL24	27	35	20	21	175	67	26	32	46	16	4	2	23	11	2	5	10	3
HDGF	271	263	178	86	663	420	147	254	163	110	58	356	223	268	115	112	172	251
PRCC	68	61	50	33	201	111	44	57	35	36	17	36	63	46	16	15	25	56
SH2D2A	94	104	81	72	370	222	77	132	80	61	39	53	191	117	21	34	59	133
NTRK1	9	6	9	0	15	2	3	9	1	3	4	7	14	12	4	3	5	5
INSRR	0	0	1	2	4	0	2	1	0	0	0	1	12	1	0	0	0	0
PEAR1	0	0	0	0	0	0	0	0	0	0	0	0	0	2	0	0	0	1
LRRC71	0	0	0	0	0	0	0	0	0	0	0	0	0	0	0	0	0	0
ARHGEF11	96	99	42	15	83	70	19	71	33	21	16	95	49	88	46	54	44	144
MIR765	0	0	0	0	0	0	0	0	0	0	0	0	0	0	0	0	0	0
ETV3L	18	14	18	5	43	14	6	6	7	8	3	35	16	12	5	13	21	0
ETV3	58	73	69	19	139	78	53	60	35	22	18	71	68	105	30	50	59	56
CYCSP52	0	0	0	0	0	0	0	0	0	0	0	0	0	0	0	2	0	0
FCRL5	2	42	1	4	9	7	4	4	4	2	0	3	1	4	0	4	0	2
FCRL4	2	11	7	1	24	3	2	5	0	0	0	0	1	0	0	1	2	1
FCRL3	20	73	28	28	21	97	31	39	23	20	38	1	49	20	3	16	17	12
FCRL2	7	44	7	4	2	17	10	3	11	6	4	5	18	5	0	1	2	19
FCRL1	7	63	2	7	17	26	9	5	13	7	7	1	37	17	4	2	1	19
CD5L	0	0	0	0	0	0	0	0	0	0	0	0	0	0	0	0	1	0
KIRREL	0	0	0	0	0	0	0	0	0	0	0	0	0	0	0	0	0	0
LOC646268	0	0	0	0	0	0	0	0	0	0	0	0	0	0	0	0	0	0
CD1D	0	0	0	0	0	1	0	0	0	0	0	0	0	0	0	0	0	0
CD1A	0	0	0	0	2	0	0	0	0	0	0	0	0	0	0	0	0	0
CD1C	0	1	3	1	2	7	0	0	0	0	0	0	0	0	0	0	1	1
CD1B	0	0	0	0	1	0	0	2	0	2	0	0	2	0	0	0	0	1
CD1E	0	4	0	0	1	0	0	0	0	0	1	0	0	1	0	0	1	1
OR10T2	0	0	0	0	0	0	0	0	0	0	0	0	0	0	0	0	0	0
OR10K2	0	0	0	0	0	0	0	0	0	0	0	0	0	0	0	0	0	0
OR10K1	0	0	0	0	0	0	0	0	0	0	0	0	0	0	0	0	0	0
OR10R2	0	0	0	0	0	0	0	0	0	0	0	0	0	0	0	0	0	0
OR6Y1	0	0	0	0	0	0	0	0	0	0	0	0	0	0	0	0	0	0
OR6P1	0	0	0	0	0	0	0	0	0	0	0	0	0	0	0	0	0	0
OR10X1	0	0	0	0	0	0	0	0	0	0	0	0	0	0	0	0	0	0
OR10Z1	0	0	0	0	0	0	0	0	0	0	0	0	0	0	0	0	0	0
SPTA1	0	0	0	0	1	0	0	1	1	0	0	1	2	1	0	0	1	1
OR6K2	0	0	0	0	0	0	0	0	0	0	0	0	0	0	0	0	0	0
OR6K3	0	0	0	0	0	0	0	0	0	0	0	0	0	0	0	0	0	0
OR6K6	0	0	0	0	0	0	0	0	0	0	0	0	0	0	0	0	0	0
OR6N1	0	0	0	0	0	0	0	0	0	0	0	0	0	0	0	0	0	0
OR6N2	0	0	0	0	0	0	0	0	0	0	0	0	0	0	0	0	0	0
MNDA	3	19	1	3	10	14	3	5	3	5	4	33	2	2	0	2	2	21
PYHIN1	8	68	16	48	36	83	22	42	10	13	17	32	58	26	17	11	16	97
IFI16	117	404	120	119	810	403	115	205	128	97	79	62	203	151	44	84	65	317
AIM2	10	39	10	11	39	52	17	16	13	8	6	0	17	27	1	5	3	12
CADM3	0	0	0	0	0	0	0	0	0	0	0	0	1	0	0	0	0	0
LOC100131825	0	0	0	0	0	0	0	0	0	0	0	0	1	0	0	0	0	0
DARC	0	0	0	0	2	0	0	0	0	0	0	0	0	0	0	0	0	0
FCER1A	5	0	1	1	11	1	0	3	1	3	1	0	3	1	1	1	1	4
OR10J3	0	0	0	0	0	0	0	0	0	0	0	0	0	0	0	0	0	0
OR10J1	0	0	0	0	0	0	0	0	0	0	0	0	0	0	0	0	0	0
OR10J5	0	0	0	0	0	0	0	0	0	0	0	0	0	0	0	0	0	0
APCS	0	0	0	0	0	0	0	0	0	0	0	0	0	0	0	0	0	0
CRP	0	0	0	0	0	0	0	0	0	0	0	0	0	0	0	0	0	0
DUSP23	7	6	1	4	10	7	2	4	9	9	1	1	6	2	2	2	1	4
FCRL6	5	1	0	7	1	5	2	0	4	3	0	1	7	0	0	1	4	6
SLAMF8	134	107	3	9	65	72	71	82	60	20	5	6	68	89	33	23	30	196
C1orf204	6	6	0	2	8	4	0	9	8	2	0	1	6	1	2	0	4	8
VSIG8	0	0	0	0	0	0	0	0	0	0	0	0	0	1	0	0	0	0
CCDC19	0	3	3	0	1	1	0	0	1	0	1	2	0	4	1	1	1	2
TAGLN2	257	489	182	113	679	429	175	330	211	132	57	323	283	299	72	93	113	250
IGSF9	0	4	0	0	0	0	0	0	0	0	0	1	0	0	0	0	0	0
SLAMF9	0	9	0	0	0	0	0	0	0	1	0	2	0	6	1	0	0	0
LOC100505633	0	0	0	0	0	0	0	0	0	0	0	0	1	0	0	0	0	0
PIGM	12	29	10	13	43	23	9	15	16	5	5	6	15	21	4	3	1	31
KCNJ10	0	1	0	0	0	0	0	0	0	0	0	0	0	0	0	0	0	3
KCNJ9	0	0	0	0	0	0	0	0	0	0	0	0	0	0	0	0	0	0
IGSF8	30	56	32	24	109	54	25	45	43	25	7	9	32	26	14	10	15	26
ATP1A2	0	0	0	0	0	0	0	0	0	0	0	0	0	0	0	0	0	0
ATP1A4	0	0	0	0	0	0	0	0	0	0	0	0	0	0	0	0	0	0
CASQ1	0	0	0	0	0	1	0	0	0	0	0	0	0	0	0	0	0	0
PEA15	227	349	167	68	463	404	221	253	168	107	47	236	249	237	152	111	207	354
DCAF8	86	227	98	99	283	242	77	144	111	78	33	72	136	92	55	39	61	227
PEX19	33	64	24	20	157	78	38	47	34	31	14	23	60	38	13	15	32	54
COPA	202	322	208	114	736	434	179	266	176	114	68	149	209	214	108	91	108	329
SUMO1P3	3	4	2	1	4	4	3	3	1	1	0	4	3	2	2	0	0	3
NCSTN	84	115	67	43	173	126	44	76	59	40	25	69	113	75	39	37	35	96
NHLH1	1	3	1	0	1	4	1	0	0	1	1	2	1	1	0	1	1	2
VANGL2	1	0	0	2	0	0	0	0	0	1	0	0	1	0	1	0	0	2
SLAMF6	12	87	20	38	59	62	22	32	23	31	12	9	49	20	14	5	23	73
CD84	99	233	76	65	225	253	98	159	122	102	23	46	130	92	49	46	90	295
SLAMF1	104	73	50	24	290	112	45	92	50	30	16	12	44	95	14	80	23	22
CD48	125	290	137	93	468	310	121	181	155	71	54	193	174	205	69	107	101	223
SLAMF7	657	490	475	282	1420	1229	500	760	458	189	348	450	649	1050	91	679	576	373
LY9	11	99	17	23	24	35	10	12	15	13	14	16	27	12	26	3	8	49
CD244	5	18	17	35	14	84	14	18	7	9	19	19	40	18	11	11	11	43
ITLN1	0	0	0	0	0	0	0	0	0	0	0	0	0	0	0	0	0	0
ITLN2	0	0	0	0	0	0	0	0	0	0	0	0	0	0	0	0	0	0
F11R	42	86	33	18	123	54	25	35	26	20	20	66	39	66	22	17	25	48
TSTD1	7	17	5	6	31	12	5	5	10	8	1	0	4	5	3	1	6	9
USF1	53	134	55	42	148	146	41	61	61	43	32	56	90	97	29	25	29	142
ARHGAP30	388	578	294	188	1029	817	319	434	383	198	82	347	486	380	220	143	186	562
PVRL4	0	0	0	0	0	0	1	0	0	0	0	1	0	0	3	0	1	2
KLHDC9	0	0	0	0	0	0	0	0	0	0	0	0	0	0	0	0	0	0
PFDN2	49	60	42	26	197	108	50	54	63	31	5	17	50	38	13	17	25	29
NIT1	13	28	14	14	54	38	17	18	29	12	7	11	21	19	10	5	5	46
DEDD	53	58	32	24	121	80	17	36	36	23	13	27	46	33	14	8	10	48
UFC1	55	72	51	36	137	117	37	69	49	36	13	29	66	54	17	17	21	57
USP21	22	36	18	9	71	46	13	29	18	11	7	11	29	19	13	6	4	31
PPOX	4	14	3	5	14	7	2	3	11	8	4	0	14	10	1	5	5	8
B4GALT3	49	50	24	22	87	58	30	34	21	19	16	13	31	31	6	13	12	29
ADAMTS4	0	0	1	0	5	5	4	5	1	1	1	0	1	1	0	1	0	0
NDUFS2	56	99	33	43	218	123	41	96	62	40	15	36	64	71	37	18	32	85
FCER1G	419	638	183	53	553	284	226	427	192	112	89	458	276	479	185	222	204	621
APOA2	1	1	0	0	0	0	0	0	0	0	0	0	2	0	0	0	0	0
TOMM40L	19	16	6	12	46	31	16	12	20	8	2	17	17	28	5	8	9	12
MIR5187	0	0	0	0	0	0	0	0	0	0	0	0	0	0	0	0	0	0
NR1I3	1	1	0	0	0	0	0	1	0	0	0	0	1	0	0	0	0	1
PCP4L1	0	0	0	0	0	1	0	0	0	0	0	0	0	0	0	1	0	1
MPZ	6	5	2	3	4	7	0	4	4	0	1	3	6	5	3	1	1	11
SDHC	27	75	31	18	150	90	30	46	45	21	5	16	51	38	16	14	15	59
C1orf192	1	0	0	0	0	0	0	1	0	1	0	0	0	0	0	0	0	2
FCGR2A	78	261	22	7	129	40	35	80	38	13	23	142	40	161	48	62	31	162
HSPA6	7	28	5	1	14	9	2	7	5	2	8	52	10	29	14	5	10	16
FCGR3A	112	338	21	68	139	235	92	169	73	33	19	257	114	183	85	44	51	383
FCGR2C	2	15	3	1	9	1	2	3	2	0	2	8	4	21	5	4	3	19
HSPA7	15	34	4	6	27	17	8	14	2	0	3	16	3	47	17	3	5	23
FCGR3B	0	0	0	0	0	2	1	0	0	0	0	8	0	1	0	0	0	7
FCGR2B	4	32	3	0	11	7	5	2	2	2	7	1	1	5	1	1	5	8
RPL31P11	0	0	1	0	0	0	0	0	0	0	0	0	0	0	0	0	0	0
FCRLA	2	23	5	8	13	26	2	9	7	8	2	1	4	2	0	6	1	2
FCRLB	0	1	0	0	3	0	0	1	1	0	1	2	1	0	0	0	2	1
DUSP12	11	34	11	10	57	37	11	15	16	13	10	18	18	13	5	6	6	17
ATF6	69	197	67	33	267	179	57	111	66	46	21	76	80	83	53	32	44	127
OLFML2B	4	15	1	1	0	2	0	3	0	0	0	3	0	2	23	1	0	105
NOS1AP	0	0	0	0	0	0	0	0	0	0	0	1	0	0	0	0	0	1
MIR4654	0	0	0	0	0	0	0	0	0	0	0	0	0	0	0	0	0	0
MIR556	0	0	0	0	0	0	0	0	0	0	0	0	0	0	0	0	0	0
C1orf111	0	0	0	0	0	0	0	0	0	0	0	0	0	0	0	0	0	0
C1orf226	0	1	0	0	0	0	0	0	0	0	0	1	0	0	0	0	0	1
SH2D1B	3	37	20	21	23	38	5	43	29	14	48	71	110	38	17	17	18	95
UHMK1	260	560	243	177	1072	727	244	377	172	191	116	149	370	291	137	139	161	510
UAP1	24	43	31	16	94	68	29	35	23	18	10	15	41	28	12	9	12	24
DDR2	1	1	2	0	4	4	2	0	2	0	0	0	2	2	1	0	2	1
HSD17B7	6	17	10	8	35	26	4	14	13	4	5	5	11	10	5	3	1	18
C1orf110	0	0	0	0	0	0	0	0	0	0	0	0	0	0	0	0	0	0
RGS4	0	0	0	0	0	0	0	0	0	0	0	0	0	0	0	0	0	0
RGS5	1	5	1	2	17	3	3	2	3	0	1	2	2	0	0	2	2	2
NUF2	0	4	4	3	15	8	0	2	3	1	1	0	2	1	1	0	0	1
PBX1	1	0	0	0	0	0	0	0	0	1	0	0	0	0	0	0	0	1
LOC100505795	0	0	0	0	0	0	0	0	0	0	0	0	0	0	0	0	0	0
LMX1A	0	0	0	0	0	0	0	0	0	0	0	0	0	0	0	0	0	0
RXRG	0	0	0	0	0	0	0	0	0	0	0	0	0	0	0	0	0	0
LOC400794	0	0	0	0	0	0	0	0	0	0	0	0	0	0	0	0	0	0
LRRC52	0	0	0	0	0	0	0	0	0	0	0	0	0	0	0	0	0	0
MGST3	17	33	10	11	45	39	14	21	21	10	6	18	15	26	5	8	9	21
ALDH9A1	43	94	33	29	117	114	27	61	39	27	12	31	63	38	18	19	17	69
LOC440700	0	0	0	0	0	0	0	0	0	0	0	0	0	0	0	0	0	0
TMCO1	55	109	53	32	233	157	40	79	54	53	11	29	59	66	29	24	29	84
UCK2	38	39	21	17	127	60	15	30	23	17	10	14	32	22	4	15	8	13
MIR3658	0	0	0	0	0	0	0	0	0	0	0	0	0	0	0	0	0	0
FAM78B	0	0	0	0	2	0	0	0	1	0	0	0	0	0	0	0	0	0
MIR921	0	0	0	0	0	0	0	0	0	0	0	0	0	0	0	0	0	0
FMO9P	0	0	0	0	0	0	0	0	0	0	0	0	0	0	0	0	0	0
POGK	74	116	62	53	240	161	56	75	66	37	16	56	94	71	38	35	37	83
TADA1	6	25	10	6	32	27	8	19	5	6	2	6	13	9	4	3	6	13
ILDR2	7	9	8	1	37	9	3	15	9	3	0	0	3	1	3	0	2	8
MAEL	0	0	0	0	0	0	0	0	0	0	0	0	2	1	0	0	0	0
GPA33	2	1	2	2	2	4	1	2	0	4	0	0	2	1	1	0	2	8
DUSP27	0	0	0	0	0	0	0	0	0	0	0	0	0	0	0	0	0	0
POU2F1	62	181	70	49	235	184	67	106	58	57	26	54	103	101	41	36	48	145
CD247	61	195	100	115	404	312	85	143	139	86	52	96	271	141	42	48	68	218
CREG1	58	73	68	22	117	97	58	83	32	28	26	125	68	124	38	79	49	131
RCSD1	66	208	57	57	170	190	54	78	77	55	66	61	125	63	40	45	45	284
MPZL1	29	84	29	11	86	63	17	55	25	25	3	77	55	79	41	28	19	33
ADCY10	0	1	0	0	1	0	0	0	0	1	0	0	0	0	0	0	0	0
MPC2	12	57	12	8	70	49	13	22	17	13	3	12	20	20	3	9	5	21
DCAF6	36	78	33	13	84	76	25	57	27	27	2	29	54	50	16	21	21	52
GPR161	2	3	0	2	5	0	1	1	0	0	0	8	3	5	3	0	0	4
TIPRL	64	101	33	24	174	131	41	56	38	28	14	31	53	64	20	28	24	73
SFT2D2	18	35	10	14	59	53	20	39	21	12	5	23	35	32	13	16	10	30
ANKRD36BP1	2	0	0	1	0	9	0	0	1	2	0	1	1	0	0	0	1	1
TBX19	3	18	5	6	17	8	1	5	4	0	1	5	6	10	1	4	4	13
MIR557	0	0	0	0	0	0	0	0	0	0	0	0	0	0	0	0	0	0
LOC100505918	0	0	0	0	0	0	0	0	0	0	0	0	0	0	0	0	0	0
XCL2	12	0	13	5	21	9	6	4	2	0	1	1	5	6	0	2	3	4
XCL1	3	4	7	5	24	8	2	5	7	3	3	2	4	2	0	1	2	0
DPT	0	0	0	0	0	0	0	0	0	0	0	0	0	0	0	0	0	0
LINC00626	0	0	0	0	0	0	0	0	0	0	0	0	0	0	0	0	0	0
ATP1B1	39	21	25	4	66	81	31	64	39	20	5	9	48	44	4	6	25	7
NME7	6	16	5	2	25	13	7	5	12	9	3	3	6	5	7	2	3	4
BLZF1	18	21	11	10	45	24	16	14	15	5	5	11	13	15	7	5	4	27
C1orf114	0	0	0	0	0	0	0	0	0	0	0	0	0	0	0	0	0	0
SLC19A2	7	11	7	1	28	16	7	7	4	13	1	5	6	6	4	4	2	14
F5	50	159	92	11	432	216	48	93	155	49	1	13	56	78	10	13	24	14
SELP	2	11	0	1	5	0	0	1	2	0	1	0	0	0	0	1	1	3
SELL	163	751	174	98	982	593	182	357	292	159	62	46	251	136	74	72	86	400
SELE	0	0	0	0	0	0	0	0	0	0	0	0	0	0	0	0	0	0
METTL18	3	11	12	6	36	22	7	18	3	6	4	2	5	10	5	0	7	16
C1orf112	3	14	4	8	31	19	7	6	5	9	1	1	8	1	2	3	1	4
SCYL3	24	28	15	15	51	53	11	28	23	13	9	12	40	27	5	5	7	37
KIFAP3	12	50	21	27	92	70	32	35	12	11	9	8	41	36	4	8	11	21
METTL11B	0	0	0	0	0	0	0	0	0	0	0	0	0	0	0	0	0	0
MIR3119-2	0	0	0	0	0	0	0	0	0	0	0	0	0	0	0	0	0	0
MIR3119-1	0	0	0	0	0	0	0	0	0	0	0	0	0	0	0	0	0	0
LOC284688	0	0	0	0	0	0	0	0	0	0	0	0	0	0	0	0	0	0
GORAB	12	30	11	10	76	43	10	24	19	11	4	17	23	20	5	7	11	25
PRRX1	0	0	0	0	0	0	0	0	0	0	0	0	0	0	0	0	0	0
MROH9	0	0	0	0	0	0	0	0	0	0	0	0	0	0	0	0	0	0
FMO3	0	0	0	0	0	0	0	0	0	0	0	0	0	0	0	0	0	0
MIR1295A	0	0	0	0	0	0	0	0	0	0	0	0	0	0	0	0	0	0
MIR1295B	0	0	0	0	0	0	0	0	0	0	0	0	0	0	0	0	0	0
FMO6P	0	0	0	0	0	0	0	0	0	0	0	0	0	0	0	0	0	0
FMO2	0	0	0	0	0	0	0	0	0	0	0	0	0	0	0	0	0	0
FMO1	0	0	0	0	0	0	0	0	0	0	0	0	0	0	0	0	0	0
FMO4	1	5	2	3	6	3	1	3	0	0	2	0	2	2	0	0	0	2
TOP1P1	0	2	0	0	1	1	0	0	0	0	1	0	1	0	0	2	0	3
PRRC2C	644	1319	789	495	2689	1798	611	1089	666	538	233	527	908	761	353	389	425	1267
MYOC	0	0	0	0	0	0	0	0	0	0	0	0	0	0	0	0	0	0
VAMP4	49	155	39	24	137	96	26	50	18	35	14	43	63	66	35	32	28	82
METTL13	41	55	29	32	136	94	38	42	49	26	11	21	52	24	17	18	13	37
DNM3	1	11	3	0	7	10	0	2	1	3	1	1	2	0	0	1	3	3
DNM3OS	0	0	0	0	0	1	0	1	0	0	0	0	0	0	0	0	0	0
MIR214	0	0	0	0	0	0	0	0	0	0	0	0	0	0	0	0	0	0
MIR3120	0	0	0	0	0	0	0	0	0	0	0	0	0	0	0	0	0	0
MIR199A2	0	0	0	0	0	0	0	0	0	0	0	0	0	0	0	0	0	0
C1orf105	0	0	0	0	0	0	0	0	0	0	0	0	0	0	0	0	0	0
PIGC	14	32	4	9	36	42	9	26	21	10	4	6	13	16	7	2	2	33
SUCO	37	122	71	27	200	133	59	83	44	37	19	54	68	74	28	34	34	112
FASLG	8	4	9	21	44	52	24	15	13	10	16	16	37	28	6	17	10	10
TNFSF18	1	0	0	0	0	0	2	0	1	0	0	0	0	0	0	0	0	1
TNFSF4	10	11	13	6	38	21	12	15	4	3	2	4	11	8	1	12	3	10
LOC100506023	1	2	5	5	7	9	0	7	0	3	0	1	7	6	1	0	3	10
PRDX6	68	123	47	30	187	154	36	64	58	61	14	22	76	81	15	17	25	59
SLC9C2	0	0	0	0	0	0	0	0	0	0	0	0	0	0	0	0	0	0
ANKRD45	0	0	0	0	0	0	0	0	0	0	0	0	0	0	0	0	0	0
LOC730159	0	0	0	0	0	0	0	0	0	0	0	0	0	0	0	0	0	0
KLHL20	13	43	14	16	80	47	10	21	27	14	6	6	25	21	11	12	12	33
CENPL	10	14	6	7	27	12	4	7	9	0	1	5	6	1	2	0	2	20
DARS2	14	20	11	9	73	47	16	32	23	7	3	7	11	13	10	3	7	16
GAS5-AS1	0	0	0	0	1	4	0	0	0	0	0	1	1	1	2	1	0	0
GAS5	88	322	78	50	364	191	60	120	91	68	27	37	108	97	53	24	56	152
SNORD81	0	0	0	0	5	0	0	1	0	0	0	0	0	0	0	0	0	0
SNORD47	0	0	0	0	1	1	0	1	0	0	0	0	0	0	0	0	2	1
SNORD80	0	0	0	1	0	0	0	0	0	0	0	0	0	0	0	0	0	0
SNORD79	0	0	0	0	1	0	0	0	0	0	0	0	0	0	0	0	0	1
SNORD78	0	0	0	0	0	0	0	0	0	0	0	0	0	0	0	0	0	0
SNORD44	0	0	0	0	0	0	0	0	0	0	0	0	0	0	0	0	0	0
SNORD77	0	0	0	0	0	0	0	0	0	0	0	0	0	0	0	0	0	0
SNORD76	0	0	0	0	1	1	3	0	0	0	0	2	1	2	0	0	0	0
SNORD75	0	0	0	0	0	0	0	0	0	0	0	0	0	0	0	0	0	0
SNORD74	0	0	0	0	0	0	0	0	0	0	0	0	0	0	0	0	0	0
ZBTB37	15	28	16	8	53	30	11	15	19	6	13	8	29	19	10	10	11	42
SERPINC1	1	0	0	0	0	0	0	0	0	0	0	0	0	0	0	0	0	0
RC3H1	76	204	76	58	256	242	73	120	62	65	46	88	140	134	60	49	42	186
RABGAP1L	60	254	64	95	288	268	69	147	73	72	56	55	140	103	47	61	64	229
GPR52	2	6	3	3	7	8	1	8	2	4	2	6	4	7	3	1	2	5
CACYBP	108	158	85	29	338	236	68	96	79	37	16	15	65	50	18	18	33	41
MRPS14	13	41	11	12	57	32	14	23	21	11	1	6	20	14	5	7	14	22
TNN	0	0	0	0	0	0	0	0	0	0	0	0	0	0	0	0	0	0
KIAA0040	80	123	40	52	131	139	58	56	52	28	23	29	60	62	15	35	19	79
TNR	0	0	0	0	0	0	0	0	0	0	0	0	0	0	0	0	0	0
RFWD2	51	98	36	19	141	103	38	57	46	29	7	38	57	67	22	11	34	83
SCARNA3	0	1	1	0	0	0	0	0	0	2	0	1	0	0	0	1	1	0
PAPPA2	0	0	0	0	0	0	0	0	0	0	0	0	0	0	0	0	0	0
ASTN1	0	0	0	0	0	0	0	0	0	0	0	0	0	0	0	0	0	0
MIR488	0	0	0	0	0	0	0	0	0	0	0	0	0	0	0	0	0	0
FAM5B	0	0	0	0	0	0	0	0	0	0	0	0	0	0	0	0	0	0
SEC16B	0	0	0	0	0	0	0	0	0	0	0	0	0	0	0	0	0	0
LOC730102	0	0	0	0	0	0	0	0	0	0	0	0	1	0	0	0	0	0
RASAL2-AS1	0	0	0	0	0	0	0	0	0	1	0	0	0	1	1	0	0	0
RASAL2	17	19	5	5	31	32	12	29	28	18	0	9	40	26	10	8	18	18
TEX35	0	0	0	0	0	0	0	0	0	0	0	0	0	0	0	0	0	0
C1orf220	4	6	4	4	6	2	0	1	3	1	2	0	2	4	1	2	2	5
MIR4424	0	0	0	0	0	0	0	0	0	0	0	0	0	0	0	0	0	0
RALGPS2	36	162	41	26	98	140	34	41	28	17	19	25	70	41	11	18	19	77
ANGPTL1	1	0	0	1	0	0	0	0	0	1	0	1	0	1	1	0	0	0
FAM20B	64	118	68	39	289	172	53	96	47	39	27	41	65	52	16	26	36	82
TOR3A	27	62	16	12	94	79	16	34	28	16	7	15	39	16	6	16	14	31
ABL2	185	158	85	36	248	196	94	213	105	76	40	86	151	134	70	55	68	190
SOAT1	57	145	52	44	235	174	72	91	45	43	29	101	63	79	39	41	40	133
AXDND1	0	0	0	0	0	0	0	0	0	0	0	0	0	0	0	0	0	0
NPHS2	0	0	0	0	0	0	0	0	0	0	0	0	0	0	0	0	0	0
TDRD5	0	0	0	0	0	0	0	0	0	0	0	0	0	0	0	0	0	0
FAM163A	0	0	0	0	0	0	0	0	0	0	0	0	0	0	0	0	0	0
TOR1AIP2	65	125	96	39	232	169	67	89	66	57	25	64	82	87	32	43	37	129
TOR1AIP1	66	151	68	40	208	159	52	87	36	59	14	53	101	89	39	22	40	155
CEP350	137	343	163	91	528	397	128	195	110	117	70	174	209	261	85	96	102	311
QSOX1	78	195	41	20	139	92	41	86	43	38	15	276	117	197	64	39	63	217
FLJ23867	0	9	0	0	10	6	1	1	5	3	0	9	5	8	2	1	4	11
LHX4	0	2	1	0	3	1	0	0	0	0	0	0	1	0	0	1	1	0
LOC100527964	5	7	4	4	20	2	5	6	3	1	0	2	8	1	0	0	0	5
ACBD6	23	31	14	9	68	58	14	35	20	15	5	10	18	11	8	8	11	28
MIR3121	0	0	0	0	0	0	0	0	0	0	0	0	0	0	0	0	0	0
XPR1	61	95	44	17	186	124	37	55	46	33	11	50	69	64	20	23	20	70
KIAA1614	0	0	0	0	2	0	0	3	0	0	0	1	0	0	0	0	0	0
STX6	64	142	59	29	204	146	56	76	55	37	15	151	80	103	35	45	41	110
MR1	51	104	33	28	128	154	54	63	42	27	29	47	78	82	25	35	51	125
IER5	209	170	143	69	454	307	127	183	134	69	51	169	208	288	98	104	184	121
GM140	0	0	0	0	0	0	0	0	0	0	0	0	0	0	0	0	0	0
CACNA1E	0	0	1	4	2	12	1	3	0	0	0	0	0	1	0	1	2	3
ZNF648	0	0	0	0	0	0	0	0	0	0	0	0	0	0	0	0	0	0
GLUL	839	2739	270	161	877	899	752	981	582	305	128	903	1028	1078	489	380	438	2468
TEDDM1	0	0	0	0	0	0	0	0	0	0	0	0	0	0	0	0	0	0
LINC00272	0	0	0	0	0	1	0	0	0	0	0	0	0	0	0	0	0	0
RGSL1	0	0	0	0	0	0	0	0	0	0	0	0	0	0	0	0	0	0
RNASEL	26	50	12	12	38	25	20	38	19	11	14	16	22	26	14	14	8	58
RGS16	65	28	68	20	282	120	45	98	57	30	3	22	59	67	12	32	49	4
LOC284648	0	0	0	0	0	1	0	0	0	0	0	0	0	0	0	0	1	0
RGS8	0	0	0	0	0	0	0	0	0	0	0	0	0	0	0	0	0	0
NPL	59	77	16	10	65	55	24	78	31	16	4	57	30	53	68	13	24	189
DHX9	295	406	355	158	1371	710	212	358	261	181	64	130	222	260	82	109	131	228
SHCBP1L	0	0	0	0	0	0	0	0	0	0	0	0	0	0	0	0	0	0
LAMC1	4	22	11	3	11	11	9	12	7	4	4	5	15	8	14	2	5	14
LAMC2	0	0	2	0	7	0	0	0	0	0	0	6	0	1	0	0	1	0
NMNAT2	0	0	0	0	0	0	0	0	0	0	0	0	1	0	0	0	0	0
SMG7-AS1	2	0	1	0	0	1	1	0	1	0	0	0	0	1	0	0	0	0
SMG7	86	189	109	70	278	218	71	127	75	59	37	57	122	115	51	54	51	149
NCF2	306	498	66	76	143	409	144	245	172	137	72	480	467	291	265	137	230	378
ARPC5	413	696	209	127	780	652	211	376	240	204	67	337	401	365	192	152	217	526
RGL1	157	205	37	31	153	142	91	139	69	47	33	43	68	119	72	62	100	497
APOBEC4	0	0	0	0	0	0	0	0	0	0	0	0	0	0	0	0	0	0
GLT25D2	2	10	8	4	14	20	7	20	4	2	0	11	43	10	1	3	4	16
TSEN15	24	41	19	18	83	77	22	28	15	15	6	8	31	14	8	4	10	13
C1orf21	40	30	54	43	159	68	23	72	18	23	23	148	73	162	24	48	47	126
EDEM3	64	116	54	21	185	127	49	91	36	34	17	58	93	78	51	31	25	164
FAM129A	212	222	255	165	670	459	244	335	143	124	87	176	245	266	192	199	300	438
RNF2	16	49	17	19	64	43	20	25	15	14	4	12	28	21	11	6	4	20
TRMT1L	12	41	17	6	68	46	21	22	10	14	4	11	20	25	11	7	4	36
SWT1	16	23	6	4	25	25	7	18	5	8	5	16	16	20	5	2	4	19
IVNS1ABP	394	729	427	143	967	780	375	299	253	126	80	782	384	1042	339	242	261	478
LOC100288079	0	0	0	0	0	0	0	0	0	0	0	0	0	0	0	0	0	0
HMCN1	0	1	0	0	0	1	0	0	0	0	0	2	0	0	0	0	0	0
MIR548F1	0	0	0	0	0	0	0	0	0	0	0	0	0	0	0	0	0	0
RNU6-72	0	0	0	0	0	0	0	0	0	0	0	0	0	0	0	0	0	0
PRG4	2	3	1	0	11	2	0	1	2	1	1	2	0	1	1	0	1	1
TPR	174	461	213	176	840	630	174	308	232	180	74	150	298	221	127	106	139	387
C1orf27	19	60	22	15	84	47	13	28	7	20	9	17	26	25	14	17	13	45
OCLM	4	7	2	2	15	3	1	2	2	1	3	2	5	2	1	2	2	1
PDC	0	0	0	0	0	0	0	0	0	0	0	0	0	0	0	0	0	0
PTGS2	525	521	1783	32	3511	344	177	624	83	137	228	1622	402	5164	47	1417	583	30
PLA2G4A	5	6	8	1	21	24	15	16	3	2	1	4	7	19	0	4	12	18
FAM5C	0	0	0	0	0	0	0	0	0	0	0	0	0	0	0	0	0	0
LOC440704	0	0	0	0	0	0	0	0	0	0	0	0	0	0	0	0	0	0
RGS18	10	79	15	8	36	10	2	12	6	11	7	8	3	9	6	16	8	23
RGS21	0	0	0	0	0	0	0	0	0	0	0	0	0	0	0	0	0	0
RGS1	87	156	60	33	269	137	58	142	43	45	36	29	62	120	51	23	24	138
RGS13	0	1	0	0	0	1	1	0	0	0	0	0	0	0	0	0	0	0
RGS2	15	60	38	3	46	21	8	30	7	8	21	20	36	62	11	11	12	55
UCHL5	48	88	32	34	177	107	37	54	35	22	12	19	44	39	13	16	25	61
TROVE2	32	93	28	37	202	122	56	63	19	28	9	51	63	56	28	23	27	101
GLRX2	6	15	3	4	17	8	6	11	4	5	1	6	9	7	1	1	4	4
CDC73	80	157	62	39	254	168	58	104	65	44	27	69	91	92	35	54	47	127
MIR1278	0	0	0	0	0	0	0	0	0	0	0	0	0	0	0	0	0	0
B3GALT2	4	8	2	0	9	9	6	6	2	1	0	3	4	15	0	0	1	3
KCNT2	0	0	0	0	0	0	0	0	0	0	0	0	0	0	0	0	0	0
MIR4735	0	0	0	0	0	0	0	0	0	0	0	0	0	0	0	0	0	0
CFH	0	2	0	5	4	1	4	2	0	0	1	0	1	6	1	3	1	1
CFHR3	0	0	0	0	0	0	0	0	0	0	0	0	0	0	0	0	0	0
CFHR1	0	0	0	0	0	0	0	0	0	0	0	0	0	0	0	0	0	0
CFHR4	0	0	0	0	0	0	0	0	0	0	0	0	0	0	0	0	0	0
CFHR2	0	0	0	0	0	0	0	0	0	0	0	0	0	0	0	0	0	0
CFHR5	0	0	0	0	0	0	0	0	0	0	0	0	0	0	0	0	0	0
F13B	0	0	0	0	0	0	0	0	0	0	0	0	0	0	0	0	0	0
ASPM	0	5	2	3	11	6	5	5	0	6	1	4	6	3	1	2	5	9
ZBTB41	22	70	20	16	104	47	24	30	11	18	15	18	41	35	11	19	12	42
CRB1	0	0	0	0	0	0	0	1	1	0	0	0	0	0	0	0	0	1
DENND1B	36	81	35	33	144	113	51	80	29	32	25	33	51	58	20	35	35	84
C1orf53	0	0	0	0	0	0	0	0	0	0	0	0	0	0	1	0	2	0
LHX9	0	0	0	0	0	0	0	0	0	0	0	0	0	0	0	0	0	0
NEK7	72	187	53	31	272	158	81	92	31	56	15	77	119	138	50	26	28	173
ATP6V1G3	0	0	0	0	0	0	0	0	0	0	0	0	0	0	0	0	0	0
PTPRC	723	2865	981	859	3240	2752	922	1419	810	852	368	908	1589	1603	670	485	682	2514
LOC100131234	1	5	0	1	1	2	1	1	0	0	0	2	0	2	0	0	0	8
MIR181B1	0	0	0	0	0	0	0	0	0	0	0	0	0	0	0	0	0	0
MIR181A1	0	0	0	0	0	0	0	0	0	0	0	0	0	0	0	0	0	0
NR5A2	0	0	0	0	1	1	0	0	0	0	0	0	0	0	0	0	0	0
SMIM16	0	0	0	0	0	1	0	1	0	0	0	0	0	0	1	0	0	0
ZNF281	55	66	44	30	169	114	35	68	29	28	8	53	59	50	28	26	32	91
KIF14	0	1	0	0	7	5	1	3	1	4	2	0	2	2	2	4	1	2
DDX59	23	36	13	13	61	33	24	38	21	14	12	21	29	33	15	18	12	57
CAMSAP2	18	35	17	5	38	21	11	22	23	11	0	31	23	26	19	12	12	57
GPR25	0	1	0	0	0	2	0	0	0	0	0	0	0	0	0	0	0	0
C1orf106	1	0	0	0	0	0	0	0	1	0	0	0	0	0	0	0	0	0
KIF21B	115	211	162	113	385	257	95	151	108	85	57	164	167	130	66	57	75	240
CACNA1S	0	0	0	0	0	0	0	0	0	0	0	0	0	0	0	0	0	0
ASCL5	0	0	0	0	0	1	0	0	0	0	0	0	0	0	0	0	0	0
TMEM9	1	22	8	7	19	20	3	16	12	7	1	6	17	9	8	2	2	10
IGFN1	6	10	65	0	24	6	1	20	0	0	0	57	6	20	11	2	8	1
PKP1	0	0	0	0	0	0	0	0	0	0	0	0	0	0	0	0	0	0
TNNT2	0	0	0	1	0	0	0	2	0	0	0	1	0	0	2	0	0	2
LAD1	8	29	16	4	9	15	9	13	11	4	1	23	8	16	23	9	22	17
TNNI1	0	0	0	0	0	0	0	0	0	0	0	0	0	0	0	0	0	0
PHLDA3	0	1	1	1	1	0	1	1	0	1	1	1	1	3	2	1	0	2
CSRP1	34	44	11	21	72	74	22	31	23	12	2	12	30	21	15	11	16	36
RPS10P7	1	1	2	0	0	2	0	0	0	3	1	0	0	0	0	0	0	1
NAV1	15	46	32	8	96	28	23	36	12	17	2	150	32	108	21	56	46	21
MIR5191	0	0	0	0	0	0	0	0	0	0	0	0	0	0	0	0	1	0
RNU6-79	0	0	0	0	0	0	0	0	0	0	0	0	0	0	0	0	0	0
MIR1231	0	0	0	0	0	0	0	0	0	0	0	0	0	0	0	0	0	0
IPO9	79	146	91	52	331	195	66	131	82	65	24	68	112	89	64	42	61	151
SHISA4	1	0	0	1	0	0	0	0	0	0	0	0	0	0	0	0	0	1
LMOD1	0	0	0	0	0	0	0	0	0	0	0	0	0	0	0	0	0	0
TIMM17A	66	52	35	33	182	113	39	64	56	23	16	20	32	43	15	12	16	43
RNPEP	21	37	10	14	53	35	21	24	31	16	10	29	17	19	16	9	11	53
ELF3	2	2	0	1	0	0	0	0	0	1	0	0	0	0	0	0	0	0
GPR37L1	2	1	1	0	0	0	0	1	0	0	0	0	0	0	0	0	0	0
ARL8A	74	66	27	17	136	98	37	43	31	21	13	49	44	49	27	14	18	71
PTPN7	128	109	96	71	401	278	95	132	102	77	16	37	118	114	24	34	60	65
PTPRVP	0	0	0	0	0	0	1	1	0	0	0	0	0	2	0	0	0	0
LGR6	3	3	4	12	12	3	1	7	2	1	5	9	34	17	7	3	13	8
UBE2T	2	7	3	5	17	13	6	4	13	4	0	0	1	2	0	1	1	3
PPP1R12B	26	67	21	11	97	71	29	45	41	21	13	18	47	31	25	14	24	74
SYT2	1	0	2	1	1	0	0	0	0	1	1	0	0	0	0	0	0	0
KDM5B	50	119	38	26	167	141	39	92	58	33	20	53	85	89	23	32	47	73
KDM5B-AS1	0	1	0	0	0	0	0	0	0	0	0	0	0	0	0	1	0	0
LOC641515	0	0	0	0	0	0	0	0	0	0	0	0	0	0	0	0	0	0
LOC148709	0	1	3	0	0	0	2	0	0	0	0	0	0	0	0	0	0	0
RABIF	11	38	12	13	65	61	14	31	16	18	5	24	23	25	9	5	9	34
KLHL12	56	56	39	25	117	75	34	56	42	34	9	36	47	42	21	19	27	72
ADIPOR1	109	120	87	46	293	143	59	110	74	104	23	125	126	121	73	46	72	205
CYB5R1	27	26	13	14	59	29	16	19	12	14	2	13	25	18	8	7	18	41
LOC401980	0	0	0	0	0	0	0	0	0	0	0	0	1	0	0	0	0	0
TMEM183A	1	11	0	3	14	11	1	5	1	3	3	1	5	3	2	2	1	7
TMEM183B	0	0	0	0	0	0	0	0	0	0	0	0	0	0	0	0	0	0
PPFIA4	0	4	0	1	3	1	1	1	1	0	0	4	1	0	2	1	1	1
MYOG	0	0	0	0	0	0	0	0	0	0	0	0	0	0	0	0	0	0
ADORA1	0	0	0	0	0	0	0	0	0	0	0	0	0	0	0	0	0	0
MYBPH	0	0	1	0	2	0	0	0	0	0	0	0	0	0	0	0	0	0
CHI3L1	8	9	5	15	15	92	4	27	8	15	46	95	13	3	12	24	22	6
CHIT1	0	0	1	0	1	0	0	0	0	0	0	10	0	0	0	0	0	1
LOC730227	0	1	1	0	2	0	0	0	0	0	0	0	1	1	0	0	0	0
BTG2	482	622	330	154	968	649	292	418	381	286	108	298	445	319	139	143	251	388
FMOD	0	0	0	0	2	0	0	0	0	0	0	0	0	0	0	0	0	0
PRELP	0	0	0	0	0	0	0	0	0	0	0	0	0	0	0	0	0	0
OPTC	0	0	0	0	0	0	0	0	0	0	0	0	0	0	0	0	0	0
ATP2B4	78	268	103	229	556	620	165	222	165	105	86	79	290	263	40	162	125	223
SNORA77	0	0	0	0	0	0	0	0	0	0	0	0	0	0	0	0	0	0
LINC00260	0	3	0	4	9	11	1	6	1	1	1	0	4	4	0	4	3	1
LAX1	26	56	33	31	91	85	18	50	48	31	8	14	42	20	17	6	25	77
ZC3H11A	163	362	142	85	387	318	110	180	126	101	51	138	171	230	80	85	83	267
ZBED6	33	88	45	13	144	99	26	57	26	19	11	52	51	47	23	26	21	107
SNRPE	47	56	35	22	186	99	16	37	34	30	3	12	26	34	5	11	11	18
LINC00303	0	0	0	0	0	0	0	0	0	0	0	0	0	0	0	0	0	0
SOX13	2	3	5	2	1	4	0	3	2	1	0	5	3	7	2	0	2	12
ETNK2	0	0	3	0	3	4	2	4	0	0	0	0	1	2	2	1	0	0
REN	0	0	0	0	0	0	0	0	0	0	0	0	0	0	0	0	0	0
KISS1	0	0	0	0	0	0	0	0	0	0	0	0	0	0	0	0	0	0
GOLT1A	0	0	0	0	5	0	0	0	0	0	0	0	0	0	0	0	0	0
PLEKHA6	4	6	0	1	1	2	0	1	1	0	0	0	2	1	1	1	3	1
LINC00628	0	1	0	0	0	0	0	0	0	0	0	1	0	0	0	0	0	0
PPP1R15B	196	366	185	119	622	403	116	261	114	128	80	168	211	233	87	160	112	276
PIK3C2B	43	123	22	43	107	124	20	45	50	29	11	18	48	40	9	18	17	60
MDM4	193	620	183	152	776	532	173	265	193	156	135	222	377	309	130	111	161	543
LRRN2	1	3	1	2	1	4	1	1	1	1	0	0	2	0	0	0	0	2
NFASC	0	0	0	0	0	0	0	0	0	0	0	0	0	0	0	0	0	0
CNTN2	0	0	0	0	0	0	0	0	0	0	0	0	0	0	0	0	0	0
[truncated: 21,711 more rows]
