# Supplementary material for: HIF-1α regulates IL-1β and IL-17 in sarcoidosis
Source: eLife. 2019 May 1;8:e44519. doi: 10.7554/eLife.44519 (PMC6506207; doi:10.7554/eLife.44519)
Supplement: Figure 4—source data 1. [file elife-44519-fig4-data1.xlsx]

## Sheet: Sheet1
Fig.4F
AMs	IL-1b (pg/mL)			AMs	IL-1b (pg/mL)
Patient	Untreated	LPS		Controls	Untreated	LPS
P1	448	1186		C1	10.5	653
P2	500	2620		C2	1.2	611
P3	374	1302		C3	15.9	268
P4	371	1247		C4	16	358
P5	415	1186		C5	11.32	307
P6	34	954		C6	20	551
P7	284	867		C7	5.8	414
P8	394	1878		C8	14	573
P9	389	724		C9	3.5	259
P10	420	1364		C10	7.9	311
Fig.4G
Monocytes	IL-1b (pg/mL)			Monocytes	IL-1b (pg/mL)
Patient	Untreated	LPS		Control	Untreated	LPS
P1	95	272		C1	1.2	95
P2	140	193		C2	6	105
P3	74	153		C3	0	54
P4	86	180		C4	5	123
P5	98	265		C5	10	281
P6	35	294		C6	1.4	73
P7	35	226		C7	3.4	118
P8	84	207		C8	6.2	74
P9	66	264		C9	1	69
P10	84	495		C10	0	52
Figure 4H
AMs	IL-1Ra (pg/mL)			PBMCs	IL-1Ra (pg/mL)
	Sarcoid	Control		Sarcoid	Control
1	9716.91	1609		3054.06	2549.23
2	9694.38	2035.15		8639.9	1315.58
3	9566.32	2049.12		6905.74	740.34
4	9724.05	1746.36		8350.12	931.23
5	9383.77	1182.95		7289.08	2085.41
6	7998.82			6869.23
7	9856.04			4935.58
8	9241.9			5469.57
9	9402.56			8083.44
10	9477.32			8890.1
