# Supplementary material for: HIF-1α regulates IL-1β and IL-17 in sarcoidosis
Source: eLife. 2019 May 1;8:e44519. doi: 10.7554/eLife.44519 (PMC6506207; doi:10.7554/eLife.44519)
Supplement: Figure 5—source data 1. [file elife-44519-fig5-data1.xlsx]

## Sheet: Sheet1
Figure 5E	AMs	IL-1b (pg/mL)
	P1	P2	P3	P4
NSsiRNA	313	425	302	201
NSsiRNA+LPS	611	1220	843	698
HIFSiRNA	50	69	40	41
HIFSiRNA+LPS	216	350	204	89
Figure 5F	AMs	IL-10 (pg/mL)
	P1	P2	P3	P4
NSsiRNA	815	850	919	1057
NSsiRNA+LPS	1238	1193	1186	1294
HIFSiRNA	544	680	625	824
HIFSiRNA+LPS	1200	1097	1127	1225
