# Supplementary material for: HIF-1α regulates IL-1β and IL-17 in sarcoidosis
Source: eLife. 2019 May 1;8:e44519. doi: 10.7554/eLife.44519 (PMC6506207; doi:10.7554/eLife.44519)
Supplement: Figure 6—source data 1. [file elife-44519-fig6-data1.xlsx]

## Sheet: Sheet1
Figure 6A	PBMCs	IL-1b (pg/mL)
	P1	P2	P3	P4
NSsiRNA	0	0	0	0
NSsiRNA+LPS	294	264	320	210
HIFsiRNA	0	0	0	0
HIFsiRNA+LPS	74	85	89	55
Figure 6B	PBMCs	IL-10 (pg/mL)
	P1	P2	P3	P4
NSsiRNA	0	0	0	0
NSsiRNA+LPS	2470	1567	1825	1937
HIFsiRNA	0	0	0	0
HIFsiRNA+LPS	1330	1128	1240	1228
Figure 6C
IL-1b (pg/mL)	Sarcoid	Controls
1	126	0
2	132	10
3	81	0
4	67	7
5	300	12
6	49	10
7	104	4
8	69	0
9	62	0
10	152	9
11	50
Figure 6D
IL-17 (pg/mL)	Sarcoid	Controls
1	620	52
2	349	36
3	598	5
4	400	47
5	467	33
6	525	70
7	597	94
8	545	65
9	463	45
10	542	85
11	429
Figure 6E
IL-1b (pg/mL)	P1	P2	P3	P4
NSsiRNA	0	0	0	0
NSsiRNA+anti-CD3	386	476	399	266
HIFsiRNA	0	0	0	0
HIFsiRNA+anti-CD3	11	9	10	15
Figure 6F
IL-17 (pg/mL)	P1	P2	P3	P4
NSsiRNA	0	0	0	0
NSsiRNA+anti-CD3	180	465	341	320
HIFsiRNA	0	0	0	0
HIFsiRNA+anti-CD3	40	80	30	39
Figure6G
IL-6 (pg/mL)	P1	P2	P3	P4
NSsiRNA	0	0	0	0
NSsiRNA+anti-CD3	1260	1214	1635	1301
HIFsiRNA	0	0	0	0
HIFsiRNA+anti-CD3	96	272	341	136
Figure 6H
IFN-g (pg/mL)	P1	P2	P3	P4
NSsiRNA	0	0	0	0
NSsiRNA+anti-CD3	1327.67	627	659	442
HIFsiRNA	0	0	0	0
HIFsiRNA+anti-CD3	1263.03	589	600	306
Figure6I
IL-10 (pg/mL)	P1	P2	P3	P4
NSsiRNA	9	18	3	10
NSsiRNA+anti-CD3	5905	2445	3358	4994
HIFsiRNA	0	0	0	0
HIFsiRNA+anti-CD3	4827	2898	3511	4217
