# Supplementary material for: HIF-1α regulates IL-1β and IL-17 in sarcoidosis
Source: eLife. 2019 May 1;8:e44519. doi: 10.7554/eLife.44519 (PMC6506207; doi:10.7554/eLife.44519)
Supplement: Figure 7—source data 1. [file elife-44519-fig7-data1.xlsx]

## Sheet: Sheet1
Figure7E
IL-1b (pg/mL)	P1	P2	P3	P4	P5	P6
Control	20	19	24	13	23	12
anti-CD3	563	461	345	580	511	516
Echino	0	0	0	0	0	0
anti-CD3+Echino	43	40	38	44	51	56
Figure7F
IL-17 (pg/mL)	P1	P2	P3	P4	P5	P6
Control	0	0	0	0	0	0
anti-CD3	706	565	744	1172	805	811
Echino	0	0	0	0	0	0
anti-CD3+Echino	145	117	267	325	196	136
Figure7G
IL-6 (pg/mL)	P1	P2	P3	P4	P5	P6
Control	0	0	0	0	0	0
anti-CD3	834	780	632	1021	671	1214
Echino	0	0	0	0	0	0
anti-CD3+Echino	243	124	102	312	127	263
