# Supplementary material for: HIF-1α regulates IL-1β and IL-17 in sarcoidosis
Source: eLife. 2019 May 1;8:e44519. doi: 10.7554/eLife.44519 (PMC6506207; doi:10.7554/eLife.44519)
Supplement: Figure 8—source data 1. [file elife-44519-fig8-data1.xlsx]

## Sheet: Sheet1
Figure8G	AMs
IL-1b (pg/mL)	P1	P2	P3	P4	P5
Control	45	44	80	70	89
CHQ	0	2	9	7	0
LPS	441	445	569	419	380
LPS+CHQ	76	60	80	85	78
Figure8H	PBMCs
IL-1b (pg/mL)	P1	P2	P3	P4	P5
Control	0	0	0	0	0
CHQ	0	0	0	0	0
anti-CD3	767	680	544	445	718
anti-CD3+CHQ	68	60	45	25	65
Figure8I	PBMCs
IL-17 (pg/mL)	P1	P2	P3	P4	P5
Control	0	0	0	0	0
CHQ	0	0	0	0	0
anti-CD3	900	1088	962	804	984
anti-CD3+CHQ	104	156	80	76	94
